# Advances in Spiral fMRI: A High-resolution Study with Single-shot Acquisition

Lars Kasper<sup>1,2,†</sup>, Maria Engel<sup>1</sup>, Jakob Heinzle<sup>2</sup>, Matthias Mueller-Schrader<sup>2</sup>, Nadine N. Graedel<sup>1,3</sup>, Jonas Reber<sup>1</sup>, Thomas Schmid<sup>1</sup>, Christoph Barmet<sup>1</sup>, Bertram J. Wilm<sup>1</sup>, Klaas Enno Stephan<sup>2,4,5</sup>, Klaas P. Pruessmann<sup>1</sup>

1. Institute for Biomedical Engineering, ETH Zurich and University of Zurich, Gloriastrasse 35, 8092 Zurich, Switzerland

2. Translational Neuromodeling Unit, Institute for Biomedical Engineering, University of Zurich and ETH Zurich, Wilfriedstrasse 6, 8032 Zurich, Switzerland

3. Wellcome Centre for Integrative Neuroimaging, FMRIB, Nuffield Department of Clinical Neurosciences, University of Oxford, Oxford, United Kingdom

4. Wellcome Centre for Human Neuroimaging, University College London, London WC1N 3BG, UK

5. Max Planck Institute for Metabolism Research, 50931 Cologne, Germany

<sup>†</sup>Current Address: Techna Institute, University Health Network Toronto, Canada

## Highlights

- This work reports the first fMRI study at 7T with high-resolution spiral readout gradient waveforms.

- We achieve spiral fMRI with sub-millimeter resolution (0.8 mm, FOV 230 mm), acquired in a single shot (36 slices in 3.3 s).

- Spiral images exhibit intrinsic geometric congruency to anatomical scans, and spatially specific activation patterns.

- Image reconstruction rests on a signal model expanded by measured trajectories and static field maps, inverted by cg-SENSE.

## Advances in Spiral fMRI

- 25 • We assess generalizability of the approach for spiral in/out readouts, providing two  
26 images per shot (1.5 mm resolution).

27

### Abstract

28 Spiral fMRI has been put forward as a viable alternative to rectilinear echo-planar  
29 imaging, in particular due to its enhanced average k-space speed and thus high  
30 acquisition efficiency. This renders spirals attractive for contemporary fMRI applications  
31 that require high spatiotemporal resolution, such as laminar or columnar fMRI. However,  
32 in practice, spiral fMRI is typically hampered by its reduced robustness and ensuing  
33 blurring artifacts, which arise from imperfections in both static and dynamic magnetic  
34 fields.

35 Recently, these limitations have been overcome by the concerted application of an  
36 expanded signal model that accounts for such field imperfections, and its inversion by  
37 iterative image reconstruction. In the challenging ultra-high field environment of 7 Tesla,  
38 where field inhomogeneity effects are aggravated, both multi-shot and single-shot 2D  
39 spiral imaging at sub-millimeter resolution was demonstrated with high depiction quality  
40 and anatomical congruency.

41 In this work, we further these advances towards a time series application of spiral  
42 readouts, namely, single-shot spiral BOLD fMRI at 0.8 mm in-plane resolution. We  
43 demonstrate that high-resolution spiral fMRI at 7 T is not only feasible, but delivers both  
44 excellent image quality, BOLD sensitivity, and spatial specificity of the activation maps,  
45 with little artifactual blurring. Furthermore, we show the versatility of the approach with  
46 a combined in/out spiral readout at a more typical resolution (1.5 mm), where the high  
47 acquisition efficiency allows to acquire two images per shot for improved sensitivity by  
48 echo combination.

49

## 50 **1 Introduction**

51 Functional MRI (fMRI) is presently the most prominent technique to study human brain  
52 function non-invasively, owing to its favorable spatiotemporal resolution regime with  
53 appealing functional sensitivity. Within this regime, specific research questions require  
54 different trade-offs between spatial and temporal resolution. On the one hand, ultra-high  
55 spatial resolution fMRI (with sub-millimeter voxel size) successfully targets smaller  
56 organizational structures of the brain, such as cortical laminae (Fracasso et al., 2016;  
57 Huber et al., 2017a; Kashyap et al., 2018; Kok et al., 2016; Lawrence et al., 2018; Martino et  
58 al., 2015; Muckli et al., 2015; Siero et al., 2011) and columns (Cheng et al., 2001; Feinberg  
59 et al., 2018; Yacoub et al., 2008). For subcortical sites, due to the limited signal-to-noise  
60 ratio (SNR), high-resolution (1-1.5 mm) fMRI is more prevalent (but see (Wang et al.,  
61 2020)) to characterize, for example, the superior (Savjani et al., 2018; Singh et al., 2018)  
62 and inferior colliculi (De Martino et al., 2013; Sitek et al., 2019), as well as the subthalamic  
63 nucleus (de Hollander et al., 2017) and midbrain (D'Ardenne et al., 2008). However, both  
64 high and ultra-high spatial resolution fMRI require compromises on field of view (FOV)  
65 coverage or temporal bandwidth, i.e., volume repetition time (TR). On the other hand,  
66 fast sequences with TRs on the order of 0.5 seconds and below are important for  
67 advanced analysis approaches, for example, to adequately sample physiological  
68 fluctuations (Lewis et al., 2016; Smith et al., 2013; Uğurbil et al., 2013), at the expense of  
69 lowering spatial resolution (2-4 mm).

70 One means to simultaneously advance the spatial and temporal resolution boundaries of  
71 fMRI is to maximize acquisition efficiency, i.e., sampled k-space area (or volume) per unit  
72 time. Therefore, fMRI nowadays almost exclusively relies on rectilinear echo-planar  
73 imaging (EPI, (Cohen and Schmitt, 2012; Mansfield, 1977; Schmitt et al., 2012)), where  
74 acquisition efficiency is favorable due to optimal acceleration and high terminal velocity  
75 along the straight k-space lines traversed.

## Advances in Spiral fMRI

76 To expand spatiotemporal resolution beyond the capabilities of EPI alone, the main  
77 strategy has been parallel imaging acceleration (Griswold et al., 2002; Pruessmann et al.,  
78 1999; Sodickson and Manning, 1997), in combination with simultaneous multi-slice or 3D  
79 excitation (Breuer et al., 2006; Larkman et al., 2001; Poser et al., 2010; Setsompop et al.,  
80 2012). In terms of k-space coverage per unit time, the benefit of parallel imaging lies in  
81 expanding the cross section of the k-space neighborhood covered along the readout  
82 trajectory (Pruessmann, 2006), i.e., a band in 2D or tube in 3D.

83 However, another key determinant of acquisition efficiency or speed of coverage is  
84 average velocity along the trajectory, i.e., instantaneous gradient strength. On this count,  
85 EPI is wasteful because it includes many sharp turns traversed at low speed due to the  
86 limited gradient slew rate.

87 Substantially higher average k-space speed and thus acquisition efficiency for fMRI is  
88 achieved with spiral trajectories (Barth et al., 1999; Glover, 2012; Noll et al., 1995), which  
89 avoid sharp turns by distributing curvature more evenly (Ahn et al., 1986; Likes, 1981;  
90 Meyer et al., 1992). Typically, single-shot variants winding out of k-space center, e.g., on  
91 an Archimedean spiral, are prevalent (Glover, 1999; Meyer et al., 1992; Weiger et al.,  
92 2002), but different acquisition schemes, such as spiral-in (Börnert et al., 2000) or  
93 combined in/out readouts (Glover and Law, 2001; Glover and Thomason, 2004) have been  
94 proposed. High-resolution fMRI studies have occasionally employed spirals as well (Jung  
95 et al., 2013; Singh et al., 2018), including first applications of laminar fMRI (Ress et al.,  
96 2007) and regionally optimized acquisitions, e.g., for the hippocampus (Preston et al.,  
97 2010) or superior colliculus (Katyal et al., 2010; Savjani et al., 2018). Common to these  
98 approaches is a reduction of acquisition efficiency in favor of robustness by acquiring k-  
99 space in multiple shots with shorter spiral readouts.

100 Despite these efforts, routine use of spiral fMRI has not been established, due to the  
101 following three challenges (Block and Frahm, 2005; Börnert et al., 1999): First, spirals are  
102 sensitive to imperfect magnetic field dynamics (drifts, eddy currents and other gradient

## Advances in Spiral fMRI

103 imperfections) which lead to blurring and image distortions. Secondly, non-uniformity of  
104 the static  $B_0$  field, caused by varying susceptibility of the imaged tissues, likewise causes  
105 blurring (Bernstein et al., 2004, Chap. 17). Finally, in combination with parallel imaging,  
106 spirals pose a somewhat greater reconstruction challenge than Cartesian trajectories  
107 (Pruessmann et al., 2001).

108 Recently, these obstacles have been overcome (Engel et al., 2018; Kasper et al., 2018; Wilm  
109 et al., 2017) by (1) employing an expanded signal model that incorporates coil sensitivity  
110 encoding as well as independently measured static and dynamic field imperfections  
111 (Wilm et al., 2011), and (2) the inversion of this model by an accompanying iterative  
112 image reconstruction (Barmet et al., 2005; Man et al., 1997; Pruessmann et al., 2001;  
113 Sutton et al., 2003). This approach enabled the use of long spiral readouts (on the order of  
114 50 ms at 7 Tesla), while maintaining high image quality and anatomical fidelity. In  
115 particular, such enhanced spiral acquisition efficiency was demonstrated by  
116 accomplishing  $T_2^*$ -weighted images with a nominal in-plane resolution of 0.8 mm in a  
117 single shot. Ultimately, these findings hold promise that spiral fMRI can now indeed  
118 profit from the theoretical benefits of enhanced acquisition efficiency to expand the  
119 spatiotemporal boundaries of fMRI.

120 Based on these advances in expanded signal modeling and inversion, in this work, we  
121 explore the feasibility and utility of sub-millimeter single-shot spiral fMRI. Specifically,  
122 we first assess image quality and temporal stability of fMRI time series obtained with the  
123 expanded signal model and algebraic reconstruction. We further evaluate the resulting  
124 functional sensitivity and spatial specificity of reference activation patterns, elicited by an  
125 established visual quarter-field stimulation paradigm.

126 Finally, we explore the versatility of the approach with a combined in/out spiral readout  
127 at a more typical resolution (1.5 mm). Here, two images per shot can be acquired,  
128 translating the high acquisition efficiency of the spiral into enhanced functional

## Advances in Spiral fMRI

129 sensitivity by echo combination (Glover and Law, 2001; Glover and Thomason, 2004; Law  
130 and Glover, 2009).

131

## 132 **2 Methods**

### 133 **2.1 Setup**

134 All data was acquired on a Philips Achieva 7 Tesla MR System (Philips Healthcare, Best,  
135 The Netherlands), with a quadrature transmit coil and 32-channel head receive array  
136 (Nova Medical, Wilmington, MA, USA).

137 Concurrent magnetic field monitoring was performed using 16 fluorine-based NMR field  
138 probes, which were integrated into the head setup via a laser-sintered nylon frame  
139 positioned between transmit and receive coil (Fig. 1 in Engel et al., 2018). Probe data were  
140 recorded and preprocessed (filtering, demodulation) on a dedicated acquisition system  
141 (Dietrich et al., 2016a). The final extraction of probe phase evolution and projection onto  
142 a spherical harmonic basis set (Barmet et al., 2008) was performed on a PC, yielding  
143 readout time courses of global phase  $k_0$  and k-space coefficients  $k_x, k_y, k_z$  with 1 MHz  
144 bandwidth.

145 For the fMRI experiments, visual stimulus presentation utilized VisuaStim LCD goggles  
146 (Resonance Technology Inc., Northridge, CA, USA). A vendor-specific respiratory bellows  
147 and finger pulse plethysmograph recorded subject physiology, i.e., respiratory and cardiac  
148 cycle.

### 149 **2.2 fMRI Paradigm and Subjects**

150 Seven healthy subjects (4 female, mean age 25.7 +/- 4.1 y) took part in this study, after  
151 written informed consent and with approval of the local ethics committee. One subject  
152 was excluded from further analysis due to reduced signal in multiple channels of the head  
153 receive array. Thus, six subjects were analyzed for this study.

154 The paradigm, a modified version of the one used in (Kasper et al., 2014), comprised two  
155 blocks of 15 s duration that presented flickering checkerboard wedges in complementary

## Advances in Spiral fMRI

156 pairs of the visual quarter-fields. In one block, *upper left* and *lower right* visual field were  
157 stimulated simultaneously (condition ULLR), while the other block presented the wedges  
158 in the *upper right* and *lower left* quarter-fields (condition URLL). These stimulation  
159 blocks were interleaved with equally long fixation periods. To keep subjects engaged, they  
160 had to respond to slight contrast changes in the central fixation cross via button presses  
161 of the right hand. A single run of the paradigm took 5 min (5 repetitions of the ULLR-  
162 Fixation-URLL-Fixation sequence). For both of the spiral sequence designs (high-  
163 resolution spiral-out and combined spiral in/out, see next section), a single run of the  
164 paradigm was performed per subject.

### 165 **2.3 Spiral Trajectories and Sequence Timing**

166 Spiral fMRI was based on a slice-selective multi-slice 2D gradient echo sequence (Fig. 1)  
167 with custom-designed spiral readout gradient waveforms. For every third slice, i.e., a TR  
168 of 270 ms, concurrent field recordings were performed on the dedicated acquisition  
169 system (Dietrich et al., 2016a), with NMR field probes being excited a few milliseconds  
170 prior to readout gradient onset (Fig. 1, bottom row, (Engel et al., 2018)).

171 For the spiral trajectories, we selected two variants that had previously provided high-  
172 quality images in individual frames (Fig. 2 in (Engel et al., 2018)): a high-resolution case  
173 winding out of k-space center on an Archimedean spiral (spiral-out, Fig. 1, black gradient  
174 waveform), and a combined dual-image readout first spiraling into k-space center,  
175 immediately followed by a point-symmetric outward spiral (spiral in/out (Glover and Law,  
176 2001)), Fig. 1, blue gradient waveform).

177 The spiral-out gradient waveform was designed to deliver the highest spatial resolution  
178 possible under several constraints. First, targeting maximum acquisition efficiency in 2D  
179 commands a single-shot 2D readout, because the sequence overhead, i.e., time spent  
180 without sampling k-space, accrues for each new excitation. Second, the parallel imaging  
181 capability of our receiver array at 7 T allowed for an in-plane acceleration factor of  $R = 4$



## Advances in Spiral fMRI

182 (determining the spacing of the spiral revolutions, i.e., FOV). We based this choice on  
183 previous experience with spirals of such undersampling using this setup (Engel et al.,  
184 2018; Kasper et al., 2018), which were free of aliasing artifacts or prohibitive g-factor  
185 noise amplification. Third, the requirement of concurrent field recordings for the whole  
186 spiral readout limited its maximum duration to below 60 ms. This is the approximate  
187 lifetime of the NMR field probe signal, after which complete dephasing occurs in a subset  
188 of probes for this specific setup, governed by their  $T_2^*$  decay time of 24 ms (Engel et al.,  
189 2018) and distance from iso-center when applying higher-order shims. Finally, the  
190 gradient system specifications constrain the maximum possible resolution (or k-space  
191 excursion) of an Archimedean spiral with prescribed FOV and duration. Here, we used  
192 the optimal control algorithm by (Lustig et al., 2008) to design time-optimal spiral  
193 gradient waveforms of 31 mT/m maximum available gradient amplitude, and a 160  
194 mT/m/ms slew rate limit, chosen for reduced peripheral nerve stimulation.

195 Overall, these requirements led to a spiral-out trajectory with a nominal in-plane  
196 resolution of 0.8 mm (for a FOV of 230 mm), at a total readout acquisition time (TAQ) of  
197 57 ms. BOLD-weighting was accomplished by shifting the readout start, i.e., TE, to 20 ms.

198 For the spiral in/out, we followed the same design principles, targeting a minimum dead  
199 time after excitation, and a symmetric readout centered on a TE of 25 ms, slightly shorter  
200 than reported  $T_2^*$  values in cortex at 7 T (Peters et al., 2007). This resulted in a gradient  
201 waveform lasting 39 ms, with a nominal resolution of 1.5 mm for each half-shot of the  
202 trajectory.

203 All other parameters of both spiral sequences were shared, in order to facilitate  
204 comparison of their functional sensitivity. In particular, slice thickness (0.9 mm) and gap  
205 (0.1 mm) were selected for near-isotropic sub-mm resolution for the spiral-out case, while  
206 still covering most of visual cortex. For each slice, the imaging part of the sequence (Fig.  
207 1) was preceded by a fat suppression module utilizing Spectral Presaturation with  
208 Inversion Recovery (SPIR, (Kaldoudi et al., 1993)).

## Advances in Spiral fMRI

209 The sequence duration totaled 90 ms per slice for the spiral-out sequence (TE 20 ms +  
210 TAQ 60 ms + SPIR 10 ms), which was maintained for the spiral in/out, even though a  
211 shorter imaging module would have been possible. To arrive at a typical volume  
212 repetition time for fMRI, we chose to acquire 36 slices (TR 3.3 s). Each functional run  
213 comprised 100 volume repetitions, amounting to a scan duration of 5.5 min.

### 214 2.4 Image Reconstruction

215 Image reconstruction rested on an expanded model of the coil signal  $s_\gamma$  (Wilm et al.,  
216 2011), that – besides transverse magnetization  $m$  – incorporates coil sensitivity  $c_\gamma$ , as  
217 well as phase accrual by both magnetostatic  $B_0$  field inhomogeneity (off-resonance  
218 frequency  $\Delta\omega_0$ ) (Barmet et al., 2005) and magnetic field dynamics  $k_l$  expanded in  
219 different spatial basis functions  $b_l$  (Barmet et al., 2008):

$$s_\gamma(t) = \int_V c_\gamma(\mathbf{r}) \cdot m(\mathbf{r}) \cdot e^{i \sum_l k_l(t) b_l(\mathbf{r})} \cdot e^{i \Delta\omega_0(\mathbf{r}) t} \cdot dV \quad (1)$$

220 with coil index  $\gamma$ , sampling time  $t$ , imaging volume  $V$ , and location vector  $\mathbf{r} = [x \ y \ z]^T$ .

221 For 2D spiral imaging without strong higher order eddy currents (e.g., as induced by  
222 diffusion encoding gradients), this model can be computationally reduced (Engel et al.,  
223 2018) to facilitate iterative inversion. To this end, we (1) considered only field dynamics  
224 contributing to global phase  $k_0$  (such as  $B_0$  drifts and breathing modulation) and spatially  
225 linear phase, i.e., k-space  $\mathbf{k} = [k_x \ k_y \ k_z]$ , as provided by the concurrent field recordings,  
226 and (2) restricted the integration to the excited 2D imaging plane by shifting the  
227 coordinate origin to the slice center  $\mathbf{r}_0$ , effectively factoring slice-orthogonal field  
228 dynamics out of the integral:

## Advances in Spiral fMRI

$$\begin{aligned}
 & s_\gamma(t) \\
 &= \int_V c_\gamma(\mathbf{r}) \cdot m(\mathbf{r}) \cdot e^{i(k_0(t) + \mathbf{k}(t) \cdot \mathbf{r})} \cdot e^{i\Delta\omega_0(\mathbf{r})t} \cdot dV \\
 &= e^{i(k_0(t) + \mathbf{k}(t) \cdot \mathbf{r}_0)} \int_V c_\gamma(\mathbf{r}) \cdot m(\mathbf{r}) \cdot e^{i\mathbf{k}(t) \cdot (\mathbf{r} - \mathbf{r}_0)} \cdot e^{i\Delta\omega_0(\mathbf{r})t} \cdot dV
 \end{aligned} \tag{2}$$

229 For the demodulated coil signal  $\tilde{s}_\gamma(t) = s_\gamma(t) \cdot \exp(-i(k_0(t) + \mathbf{k}(t) \cdot \mathbf{r}_0))$ , the discretized  
 230 version of eq. (2) – respecting finite spatial resolution and dwell time of the acquisition  
 231 system – reads as a system of linear equations

$$\tilde{s}_{(\gamma, \tau)} = \sum_\rho E_{(\gamma, \tau), \rho} m_\rho \tag{3}$$

232 with sampling time index  $\tau$ , voxel index  $\rho$ ,  $\tilde{s}_{(\gamma, \tau)} = \tilde{s}_\gamma(t_\tau)$ , encoding matrix element  
 233  $E_{(\gamma, \tau), \rho} = c_\gamma(\mathbf{r}_\rho) \cdot e^{i\mathbf{k}(t_\tau) \cdot (\mathbf{r}_\rho - \mathbf{r}_0)} \cdot e^{i\Delta\omega_0(\mathbf{r}_\rho)t_\tau}$ , and  $m_\rho = m(\mathbf{r}_\rho)$ .

234 The matrix-vector form of eq. (3) is a general linear model,

$$\tilde{\mathbf{s}} = E \mathbf{m} \tag{4}$$

235 and can be efficiently solved iteratively by a conjugate gradient (CG) algorithm  
 236 (Pruessmann et al., 2001; Shewchuk, 1994). As mentioned above, the restriction to first  
 237 order field dynamics enables acceleration of the ensuing matrix-vector multiplications by  
 238 (reverse) gridding and fast Fourier transform (FFT) (Beatty et al., 2005; Jackson et al.,  
 239 1991). Off-resonance effects are also efficiently approximated by FFT using multi-  
 240 frequency interpolation (Man et al., 1997).

241 This image reconstruction algorithm was applied equivalently to the spiral-out and spiral  
 242 in/out data with a fixed number of 10 iterations and no further regularization (e.g.,  
 243 Tikhonov). Note, however, that for the latter both field recordings and coil data were split  
 244 into their in- and out-part and reconstructed separately, yielding two images per shot.

## Advances in Spiral fMRI

245 Taken together, the in-house Matlab R2018a (The MathWorks, Natick, MA, USA)  
246 implementation of this algorithm led to total reconstruction times on a single CPU core  
247 of about 10 min per slice for the high-resolution spiral-out image and 1.5 minutes for the  
248 spiral-in or -out image. In order to reconstruct the 3600 2D images per fMRI run,  
249 reconstruction was parallelized over slices on the university's CPU cluster. Depending on  
250 cluster load, reconstructions typically finished over night for the high-resolution spiral  
251 out, and within 2 h for the spiral in/out data.

252 The auxiliary input data for the expanded signal model, i.e., spatial maps for static  $B_0$  field  
253 inhomogeneity  $\Delta\omega$  and coil sensitivity  $c_\gamma$ , were derived from a separate fully sampled  
254 multi-echo (ME) Cartesian gradient echo reference scan of 1 mm in-plane resolution with  
255 6 echoes,  $TE_1 = 4$  ms,  $\Delta TE = 1$  ms (Kasper et al., 2018), and slice geometry equivalent to  
256 the spiral sequences. Image reconstruction proceeded as described above for this scan,  
257 albeit omitting the sensitivity and static  $B_0$  map terms. The latter was justified by the high  
258 bandwidth of the Cartesian spin-warp scans (1 kHz).

259 Sensitivity maps were then computed from the first-echo image, normalizing single coil  
260 images by the root sum of squares over all channels, while the  $B_0$  map was calculated by  
261 regressing the pixel-wise phase evolution over echo images. Both maps were spatially  
262 smoothed and slightly extrapolated via a variational approach (Keeling and Bammer,  
263 2004).

## 264 2.5 Data Analysis

### 265 2.5.1 Image Quality Assessment

266 The suitability of the raw imaging data for high-resolution fMRI was assessed in terms of  
267 both sensitivity and spatial specificity. No smoothing was performed for any analysis in  
268 this section.

## Advances in Spiral fMRI

269 For sensitivity, we evaluated the temporal statistics of the images, i.e., signal-to-  
270 fluctuation noise ratio (SFNR), standard deviation (SD) and coefficient of variation (CoV)  
271 maps (Welvaert and Rosseel, 2013), defined as

$$\begin{aligned} SFNR(\mathbf{r}_\rho) &= \frac{\overline{m(\mathbf{r}_\rho)}}{SD(m(\mathbf{r}_\rho))}, \\ CoV &= \frac{1}{SFNR}, \end{aligned} \tag{5}$$

272

273 where the bar denotes averaging over volumes of a run.

274 Our assessment of spatial specificity was based on the ME reference scan, which exhibits  
275 a high geometric veracity due to its spin-warp nature, i.e., high bandwidth. We overlaid  
276 the contour edges (intensity isolines) of the mean (over echoes) of the ME images onto  
277 the mean spiral images  $\overline{m(\mathbf{r}_\rho)}$  to inspect the congruency of anatomical boundaries  
278 between the scans.

279 To reduce the impact of subject motion on both assessments, the volumes of the fMRI  
280 time series were first realigned to each other using a 6-parameter rigid-body within-  
281 contrast registration, as implemented in SPM (Friston et al., 1996). Then, the mean ME  
282 scan was co-registered to the resulting mean realigned fMRI scan. Importantly, both  
283 operations were limited to six-parameter rigid-body registration, such that nonlinear  
284 geometric distortions between sequences were not corrected through this preprocessing  
285 step. Furthermore, to facilitate visual comparison and contour edge creation, mean ME  
286 and spiral images were bias-field corrected using unified segmentation (Ashburner and  
287 Friston, 2005).

288 Furthermore, for quantitative assessment, we extracted contour lines from the  
289 thresholded gray matter tissue probability maps ( $p \geq 90\%$ ) retrieved by unified  
290 segmentation for both structural and functional images. To have highest contrast and

## Advances in Spiral fMRI

291 resolution congruence, we compared the last echo of the 1 mm ME scan (TE 10 ms) to the  
292 0.8 mm spiral-out scan (TE 20 ms). We computed histograms and *contour distance maps*,  
293 i.e., contours from the structural data whose color coding per voxel reflects their distance  
294 to the corresponding contour in the functional image. For the histograms, we evaluated  
295 the contour distance both over the whole imaging FOV and within an ROI of early visual  
296 cortex, the primary site of expected activation for our functional paradigm. Specifically,  
297 the ROI mask was created using the SPM Anatomy Toolbox Version 2.2b (Eickhoff et al.,  
298 2007, 2006, 2005) and combined probabilistic maps of human occipital cortex V<sub>1</sub>, V<sub>2</sub>  
299 (Amunts et al., 2000), V<sub>3</sub>, V<sub>4</sub> (ventral (Rottschy et al., 2007) and dorsal (Kujovic et al.,  
300 2013)), lateral occipital cortex (Malikovic et al., 2016) and V<sub>5</sub>/MT (Malikovic et al., 2007).  
301 The combined mask was warped into the individual subject geometry by the inverse  
302 deformation field retrieved through the unified segmentation mentioned above, and  
303 slightly dilated by 3 voxels to account for any inter-subject variability in visual cortex.

304 All computations were performed in Matlab R2019b, using the Unified NeuroImaging  
305 Quality Control Toolbox (UniQC, (Bollmann et al., 2018; Frässle et al., 2021)), and SPM12  
306 (Wellcome Centre for Human Neuroimaging, London, UK,  
307 <http://www.fil.ion.ucl.ac.uk/spm/>).

### 308 **2.5.2 BOLD fMRI Analysis**

309 The main goal of this analysis was to assess the functional sensitivity and spatial  
310 specificity of the spiral fMRI sequences at the single-subject level under standard  
311 paradigm and preprocessing choices. Note that, unless explicitly stated otherwise, all  
312 activation maps and their quantification (e.g., cluster extent, peak t-values) are therefore  
313 reported after smoothing.

314 Equivalent preprocessing steps were applied to all spiral fMRI runs using SPM12. After  
315 slice-timing correction, we employed the pipeline described in the previous section  
316 (realignment, co-registration, bias-field correction via unified segmentation). Finally, the

## Advances in Spiral fMRI

317 functional images were slightly smoothed with a Gaussian kernel of 0.8mm FWHM, i.e.,  
318 the voxel size of the high-resolution scan.

319 The general linear model (GLM) contained regressors of the two stimulation blocks  
320 (ULLR and URLL) convolved with the hemodynamic response function (HRF), as well as  
321 nuisance regressors for motion (6 rigid-body parameters) and physiological noise (18  
322 RETROICOR (Glover et al., 2000) regressors, as specified in (Harvey et al., 2008)),  
323 extracted by the PhysIO Toolbox (Kasper et al., 2017).

324 To characterize functional sensitivity, we evaluated the differential t-contrasts +/- (ULLR-  
325 URLL) and report results at an individual voxel-level threshold of  $p < 0.001$  ( $t > 3.22$ ). For  
326 quantification in the results tables, we report activations under whole-brain family-wise  
327 error (FWE) correction at the cluster level ( $p < 0.05$ ), given this voxel-level threshold  
328 ( $p < 0.001$ ) for cluster definition. If not noted otherwise in the figure, we omitted  
329 multiple-comparison correction in the visualization of the activation maps, to study their  
330 spatial extent and specificity.

331 Spatial specificity of the activation was qualitatively assessed by overlaying the  
332 thresholded t-contrast maps for both contrasts onto the anatomically veridical mean ME  
333 image. We checked whether activation patterns were restricted to gray matter regions of  
334 visual cortex, as well as whether the spatial separation and symmetry of activations were  
335 linked to distinct quarter-field stimulation patterns, as expected by the retinotopic  
336 organization of visual cortex (Engel et al., 1997; Wandell et al., 2007; Warnking et al.,  
337 2002). Furthermore, we evaluated the individual contrasts for the ULLR and URLL  
338 stimulation blocks to assess the spatial overlap of their activation patterns as an  
339 alternative measure of functional specificity (since the differential contrasts cannot  
340 overlap by design).

341 The quantification of functional spatial specificity relied on the tissue probability maps  
342 extracted via unified segmentation from the structural scan (mean ME). To reduce the  
343 number of uncategorized voxels, we chose a liberal exceedance threshold of 60% to

## Advances in Spiral fMRI

344 define the individual tissue classes (gray matter (GM), white matter (WM), cerebrospinal  
345 fluid (CSF)). Of the remaining voxels, those that exceeded 30 % probability for two tissue  
346 classes were categorized as gray/white matter boundary (GM/WM interface) or pial  
347 surface (GM/CSF interface). All other voxels were labeled as ambiguous. We then  
348 evaluated the share of significantly activated voxels for the differential t-contrasts +/-  
349 (ULLR-URLL) after multiple comparison correction ( $p < 0.05$  cluster-level FWE corrected  
350 with a cluster-forming voxel threshold of  $p < 0.001$ ). This analysis was performed for both  
351 the whole imaging FOV and within the ROI of early visual cortex, as defined at the end of  
352 the previous section (2.5.1). We repeated this analysis for activation maps derived from  
353 unsmoothed data to study the impact of smoothing on spatial specificity.

354 This overall analysis procedure was performed for the spiral-out as well as the individual  
355 spiral-in and spiral-out image time series reconstructed from the spiral in/out data. As  
356 spiral in/out sequences are predominantly selected for their potential gain in functional  
357 sensitivity when combining spiral-in and spiral-out images (Glover and Law, 2001), we  
358 additionally repeated the BOLD fMRI analysis for such a surrogate dataset (“in/out  
359 combined”), but omitted the quantitative analysis of spatial specificity. We chose a signal-  
360 weighted combination per voxel (Glover and Thomason, 2004), which is considered the  
361 most practical approach for echo combination (Glover, 2012):

$$m_{combined} = w \cdot m_1 + (1 - w) \cdot m_2,$$
$$w = \frac{\overline{m_1}}{\overline{m_1} + \overline{m_2}}, \quad (6)$$

362 with  $m_1$  and  $m_2$  being the in-part and out-part voxel time series, respectively.

## 363 2.6 Code and Data Availability

364 Image reconstruction was performed by an in-house custom Matlab implementation of  
365 the cg-SENSE algorithm (Pruessmann et al., 2001). A demonstration of that algorithm is  
366 publicly available on GitHub (<https://github.com/mrtm-zurich/rmsg-arbitrary-sense>),



## Advances in Spiral fMRI

367 with a static compute capsule for reproducible online re-execution on CodeOcean (Patzig  
368 et al., 2019), which were created in the context of the ISMRM reproducible research study  
369 group challenge (Maier et al., 2021; Stikov et al., 2019), albeit without the multi-frequency  
370 interpolation employed here. An example reconstruction pipeline including static Bo  
371 correction for the spiral data presented here is available on GitHub as well  
372 (<https://github.com/mrikasper/julia-recon-advances-in-spiral-fmri>), utilizing MRIReco.jl  
373 (Knopp and Grosser, 2021), an MRI reconstruction framework written in Julia (Bezanson  
374 et al., 2017).

375 Image and fMRI analyses were performed using SPM12  
376 (<https://www.fil.ion.ucl.ac.uk/spm>, distributed under GPLv2) and the in-house developed  
377 UniQC Toolbox (Bollmann et al., 2018), publicly available under a GPLv3 license as a beta  
378 release within the TAPAS software collection  
379 (<https://www.translationalneuromodeling.org/tapas>, (Frässle et al., 2021)).

380 All custom analysis and data visualization scripts for this publication are available on  
381 <https://github.com/mrikasper/paper-advances-in-spiral-fmri>. This includes both a one-  
382 click analysis (`main.m`) to rerun all image statistics and fMRI analyses, as well as the  
383 automatic re-creation of all figure components found in this manuscript  
384 (`main_create_figures.m`), utilizing the UniQC Toolbox. More details on installation and  
385 execution of the code can be found in the `README.md` file in the main folder of the  
386 repository.

387 Data from this study is publicly available as part of the ETH Research Collection  
388 (doi:10.3929/ethz-b-000487412, (Kasper et al., 2021)) and described in more detail in the  
389 accompanying Data in Brief Article, according to the FAIR (Findable, Accessible,  
390 Interoperable, and Re-usable) data principles (Wilkinson et al., 2016). For one subject  
391 (SPIFI\_0007), this includes both the reconstructed images in NIfTI format with  
392 behavioral and physiological logfiles, to validate the analysis scripts, as well as raw coil

## Advances in Spiral fMRI

393 and trajectory data in ISMRMRD format (in the patient coordinate system), together with  
394 the corresponding  $B_0$  and sensitivity maps (NIFTI).

395 For the other datasets, we did not obtain explicit subject consent to share all raw data in  
396 the public domain. However, we do provide the magnetic field evolution time series as  
397 ISMRMRD files (in the scanner coordinate system) within the ETH Research Collection.  
398 Mean spiral fMRI images with corresponding activation t-maps for all subjects are also  
399 made available on NeuroVault for interactive viewing ((Gorgolewski et al., 2015),  
400 <https://neurovault.org/collections/6086/>).

401 Finally, for further data dissemination, montage views of the presented image quality  
402 metrics and statistical map overlays containing all slices and subjects are included in the  
403 supplementary materials (high-resolution spiral-out: SM 1, spiral in/out: SM 2).

404

## 405 **3 Results**

### 406 **3.1 Spiral Image Quality, Congruency and Stability**

407 In the following, we mainly present images from individual subjects (S7: Figs. 2,3, S2: Figs.  
408 4,6,9, S3: Fig. 5). However, as illustrated by Fig. 7, as well as supplementary materials SM 1  
409 and SM 2, results were comparable for all six analyzed datasets.

410 The mean images (one run of subject S7, after realignment) of the high-resolution spiral-  
411 out sequence exhibit good image quality, rich in  $T_2^*$  contrast and anatomical detail  
412 (Fig. 2A). In the center of the brain, no blurring is apparent, and anatomical boundaries  
413 can be clearly delineated, e.g. the optic radiation, down to the single-voxel extent.  
414 Moderate residual imaging artifacts (local ringing, blurring) are visible in the  
415 orbitofrontal areas, at some brain/skull boundaries, and in the vicinity of larger muscles  
416 and fat deposits, e.g., the temporal muscles. For more inferior slices, signal dropouts can  
417 be identified at typical sites of through-plane dephasing, e.g., in the temporal lobe above  
418 the ear canals (SM 1, subject 6) or in the orbitofrontal cortex (SM 1, subject 5). Individual  
419 frames of the time series exhibit similar features (Fig. 2B), though somewhat noisier, as  
420 expected because of the reduced SNR.

421 Interestingly, the mean of the corresponding raw phase images also contains high  
422 anatomical detail and few phase wraps (Fig. 2C), which are again located at the interface  
423 between brain and skull or close to air cavities. Note that the unwrapped appearance of  
424 the phase image is a feature of the  $B_0$ -map based correction (Kasper et al., 2018) and does  
425 not require any postprocessing.

426 Mapping the temporal statistics of the spiral image time series (Fig. 3, Table 1) proves its  
427 sufficient stability for functional imaging in all slices. The SFNR images (Fig. 3A) are  
428 rather homogeneous, with mean values of 15.3 +/- 1.1 in cortical gray matter, averaged over  
429 subjects (Table 1). A slight reduction for central brain regions is visible due to the

## Advances in Spiral fMRI

430 diminished net sensitivity of the receiver array. Notably, no structured noise  
431 amplification through bad conditioning of the undersampled reconstruction problem (g-  
432 factor penalty) is discernible in this area.

433 The SD images (Fig. 3B) corroborate this impression, showing peak values in CSF-filled  
434 (lateral ventricles) and highly vascularized areas (insula, ACC). These noise clusters  
435 presumably stem from fluctuations through cardiac pulsation and are not specific to  
436 spiral acquisitions. However, for the raised SD values in voxels close to the cortex borders,  
437 it is unclear whether also CSF fluctuations, the BOLD effect itself, or rather time-varying  
438 blurring due to unaccounted magnetic field fluctuations contribute. This is scrutinized in  
439 the GLM analysis below. Additionally, for the CoV images (Fig. 3C), the internal capsule  
440 appears prominently, presumably due to its reduced average signal level.

441 In terms of spatial specificity, overlaying contour edges of the anatomical reference (mean  
442 ME spin-warp image, subject S2) (Fig. 4A) onto the mean spiral-out image suggests a  
443 geometrically very faithful depiction of the anatomical interfaces (Fig. 4B,F). Boundaries  
444 of the ventricles and gray to white matter are congruent in general, also for the visual  
445 cortex relevant to the later fMRI analyses. Some regions of the spiral-out images suffer  
446 from ringing (yellow arrow) or signal dropout (white arrow), most likely due to through-  
447 plane dephasing and incomplete correction of in-plane  $B_0$  inhomogeneity( Fig. 4E).

448 Incorporating the mean images of the spiral in/out sequence into the comparison  
449 confirms the nature of these artifacts (Fig. 4C,D,G,H). The in-part images (Fig. 4C) are  
450 devoid of these artifacts and match the anatomical reference almost completely in terms  
451 of edge contours (Fig. 4G). Only CSF/skull interfaces, for example, in frontal regions, are  
452 slightly compromised by a more global ringing, presumably from residual fat or high-  
453 intensity signal right after slice excitation, and the reversed  $T_2^*$  weighting in k-space for  
454 spiral-ins, amplifying high spatial frequencies of the image. The out-part of the spiral-  
455 in/out (Fig. 4D,H) constitutes a compromise between spiral-in and high-resolution spiral-

## Advances in Spiral fMRI

456 out in terms of artifact-level. Its shorter readout of only 20 instead of 60 ms alleviates  
457 through-plane dephasing or incomplete  $B_0$  correction through inaccurate mapping.

458 We further quantified the spatial specificity of the high-resolution spiral-out images using  
459 contour distance mapping (Fig. 5). This measure is visualized as colored anatomical  
460 image contour on top of the mean spiral image (Fig. 5A, depicting subject S<sub>3</sub>) and shows  
461 in general good congruence of functional and structural data (0 to 1.5 voxel contour  
462 distance in most voxels). Larger deviations occurred at tissue boundaries with large  
463 susceptibility gradients, e.g., close to the frontal sinus (Fig. 5A, left inset, white arrows), as  
464 well as areas with pronounced  $T_2^*$  contrast differences between the functional and  
465 structural scan, such as subcortical gray matter (Fig. 5A, right inset, yellow arrows).

466 Overall, in most slices and subjects, the mean distance between corresponding contours  
467 of the structural and functional image varied between 0.5 and 1.5 voxels, with generally  
468 better congruence for more superior slices (Fig. 5B). Prominent outliers (subject 5,6,  
469 inferior slices) arose in areas with signal dropout for the spiral-out image, which was  
470 more susceptible to through-plane dephasing than the structural ME scan due to the  
471 difference in echo time (TE 20 ms vs 5-10 ms). For visual cortex in particular (Fig. 6B), the  
472 region of interest for our functional analysis, contour congruencies between 0.5 and 1 mm  
473 were most common, with fewer outliers than in the rest of the brain, driven by both  
474 contrast differences (S<sub>2</sub>, slice 10) and signal dropouts close to the sagittal sinus (S<sub>2</sub>, slice  
475 34). Averaged over the whole volume and all subjects, the mean gray matter contour  
476 distance amounted to  $1.04 \pm 0.26$  voxels ( $0.83 \pm 0.21$  mm), varying between 0.7 (S<sub>3</sub>) and  
477 1.4 voxels (S<sub>5</sub>), i.e., 0.6-1.1 mm between subjects. Within visual cortex, congruence was  
478 slightly higher, with mean gray matter contour distances of  $0.96 \pm 0.14$  voxels ( $0.77 \pm$   
479  $0.11$  mm), varying between 0.7 (S<sub>3</sub>) and 1.2 (S<sub>2</sub>) voxels, i.e., 0.6-1.0 mm.

480 Summarizing the distribution of contour distances over all voxels in the acquisition  
481 volume (Fig. 5D),  $41 \pm 7$  % of gray matter contours in all subjects were strictly  
482 overlapping (min (S<sub>6</sub>): 35 %, max (S<sub>3</sub>): 52 %), and  $76 \pm 7$  % were at most 1 voxel apart

## Advances in Spiral fMRI

483 (min (S6): 67 %, max (S3): 85 %), with only  $11 \pm 5$  % of contour voxels exceeding a  
484 distance of 2 voxels (1.6 mm). This distribution was near-identical within visual cortex  
485 (Fig. 5E), with the exception of large outliers (3 voxels, i.e., 2.4 mm or more), which were  
486 reduced for individual subjects (S5, S6) from about 10 to 5 %.

### 487 **3.2 Functional Sensitivity and Specificity**

488 Functional sensitivity of the high-resolution spiral-out images is evident at the single-  
489 subject level (subject S2) in a differential contrast of both stimulus conditions (+/- ULLR-  
490 URLL). The corresponding t-map, overlaid on the mean functional images, reveals  
491 expected activation patterns in visual cortex (Fig. 6A). Hemispheric separation of the  
492 complementary quarter-field stimulation blocks is visible (left slice), as well as the  
493 contrast inversion from inferior to superior slices (leftmost slice vs second from left).  
494 Notably, significant activation flips between neighboring voxels occur at the cerebral  
495 fissure, suggesting spatial specificity at the voxel level.

496 This functional specificity is confirmed when overlaying the identical activation maps on  
497 the mean ME image as anatomical reference (Fig. 6B), again demonstrating the good  
498 alignment of functional and structural data seen in the previous subsection (Figs. 4,5).  
499 Clustered activation is almost exclusively constrained to gray matter with no extension  
500 into adjacent tissue or skull. Note that no multiple comparison correction was performed  
501 for visualization, in order to be more sensitive to such effects, at the expense of occasional  
502 false-positive voxels throughout other brain areas.

503 Gray-matter containment and retinotopic organization of the activation can be further  
504 corroborated in the zoomed-in sections of visual cortex for transverse, coronal and  
505 sagittal orientation (Fig. 6C). Additionally, we evaluated the ULLR and URLL blocks  
506 individually (Fig. 6D), because differential contrasts, by design, do not allow for spatial  
507 overlap between significant activation of both conditions. In the individual contrasts, the  
508 identified portion of activated visual cortex appears larger, but is still very well restricted

## Advances in Spiral fMRI

509 to cortical gray matter. Few overlaps exist, and, again, contrast switches between adjacent  
510 voxels, pointing to spatial specificity at the prescribed sub-mm resolution.

511 These findings are reproducible over subjects (Fig. 7). Importantly, similar image quality  
512 and geometric congruency are accomplished in all subjects. To verify, we show both the  
513 mean spiral and the anatomical ME reference image of the corresponding transverse slice  
514 as underlays for the differential activation patterns. Some subjects exhibit more frontal  
515 blurring artifacts and dropouts (S5, S6, S7) due to different geometry of the air cavities.  
516 Still, the retinotopic organization of visual cortex is recovered in all subjects, as visualized  
517 in the zoomed coronal and sagittal views. Existing differences of the specific activation  
518 patterns are within the expected range of variability in subject anatomy and task  
519 engagement. Quantitatively, peak t-values reach 15.1 on average for the differential  
520 contrasts, with a standard deviation of 2.6, i.e. 17 %, over subjects (Table 1). Activation  
521 clusters comprise  $10371 \pm 2480$  voxels (after FWE-multiple comparison correction at the  
522 cluster level,  $p < 0.05$ ), i.e.,  $6467 \pm 1547$  mm<sup>3</sup>.

523 Because traditional Gaussian smoothing is frequently omitted in ultra-high resolution  
524 fMRI studies (e.g., for laminar fMRI), we assessed its impact on our results. We repeated  
525 the statistical analysis for all subjects to create a version of Figure 7 based on unsmoothed  
526 data (supplementary material SM 3). For one particular subject (S2), we also juxtaposed  
527 spatial characteristics of the statistical t-maps in an animated slide show by varying  
528 significance thresholds for smoothed and unsmoothed data, as well as cropping the spiral  
529 k-space data to 1 mm resolution before reconstruction (supplementary material SM 4).  
530 Overall, spatial smoothing increased overall CNR (higher t-values) and extent of  
531 activation clusters that were already discernible in the unsmoothed data. The activation  
532 clusters of the smoothed data resemble those of unsmoothed data at lower thresholds,  
533 but with fewer single-voxel activation sites. When overlaying activation masks of both  
534 differential t-contrasts (+/- ULLR-URLL) after cluster-level multiple comparison  
535 correction ( $p < 0.05$  cluster-FWE, cluster-forming threshold:  $p < 0.001$ ) for this subject  
536 directly, we observed two distinct effects of the employed moderate smoothing

## Advances in Spiral fMRI

537 (FWHM 0.8 mm) (Fig. 8A): on the one hand, cluster extent may increase isotropically by  
538 about one voxel (left inset), consistent with a loss in spatial specificity. On the other  
539 hand, clusters can expand by several voxels along the cortical ribbon after smoothing  
540 (right inset), suggesting that increased sensitivity by averaging of thermal noise can lead  
541 to functionally more plausible activation patterns.

542 To quantify functional specificity, we evaluated the tissue type of all significantly  
543 activated voxels, and assessed the impact of smoothing on this measure (Fig. 8B), with  
544 tissue type based on the unified segmentation results of the structural data (mean ME).  
545 For smoothed data and considering the whole imaging volume (top left),  $71 \pm 8\%$  of all  
546 significantly activated voxels resided in GM (mean and standard deviation over subjects  
547 and whole volume),  $2.2 \pm 0.5\%$  and  $1.9 \pm 0.9\%$  at pial surface and GM/WM interface,  
548 respectively,  $5.7 \pm 2.7\%$  in WM and  $13 \pm 3\%$  in CSF, while for the remaining  $5.5 \pm 2.5\%$   
549 of significant voxels, tissue type could not be determined unambiguously. Gray matter  
550 containment dropped by about  $2\%$  in the unsmoothed data (bottom left), presumably  
551 due to randomly distributed false positives. This small difference is preserved when  
552 restricting the analysis to the ROI of early visual cortex (right column), in which gray  
553 matter containment is about  $3\%$  higher for both smoothed and unsmoothed data. This  
554 indicates that the impact of smoothing on this quantification of functional specificity was  
555 small on average, and that the activation containment was comparable in early visual  
556 cortex and the whole imaging volume.

### 557 **3.3 Spiral In/Out Analysis and Echo Combination**

558 We continue to present data from the same subject (S2) as in the high-resolution case, to  
559 facilitate comparison. All findings are generalizable over subjects, and we provide mean,  
560 SD, SFNR and t-maps of all slices for further dissemination in the supplementary material  
561 (SM 2).



## Advances in Spiral fMRI

562 Overall, the differential t-contrast maps for the spiral in/out data resemble the activation  
563 patterns of the high-resolution spiral-out case (Fig. 9). This holds for all three derived  
564 in/out time series, i.e., the separate reconstructions of the in-part and the out-part, as  
565 well as their combination in the image domain via signal-weighted averaging (“in/out  
566 combined”).

567 In terms of functional sensitivity, the in/out sequence provides higher peak t-values and  
568 cluster extents in the differential t-contrasts compared to the high-resolution spiral-out,  
569 as expected due to the larger voxel size and consequential higher SFNR (Table 1). For  
570 example, the in-part itself provides a 61 % SFNR increase in gray matter (averaged over  
571 subjects), 17 % increased maximum peak t-value, and 56 % increase in significantly  
572 activated gray matter volume (Table 1, rightmost column).

573 Comparing the out- to the in-part of the spirals, SFNR is slightly decreased in the out-part  
574 (8 %), while the situation is reversed for the t-maps, with 2 % increase in peak t-value and  
575 14 % increase in cluster extent, compared to the spiral-in. This suggests that higher  $T_2^*$ -  
576 sensitivity of the spiral-out causes both effects, by both amplifying signal dropouts and  
577 BOLD signal.

578 The signal-weighted echo combination (eq. (6), (Glover and Thomason, 2004)) provides  
579 the highest functional sensitivity of the three in/out time-series, having a 25 % increased  
580 SFNR compared to the in-part, and 37 % increase compared to the out-part. This  
581 translates into an average increase in peak t-value of 2 % and significant cluster extent of  
582 21 %, compared to the out-part alone. This is in line with previous findings for high-  
583 resolution multi-shot spiral data (Singh et al., 2018) at 3 T, which also reported contrast-  
584 to-noise ratio (CNR) increases for signal-weighted spiral in/out combinations on the  
585 order of 25 %. However, it falls somewhat short of the 54 % increase in CNR reported  
586 originally for low-resolution single-shot spiral in/out combination (Glover and Thomason,  
587 2004, p. 866).

## Advances in Spiral fMRI

588 In terms of spatial specificity, all activation patterns exhibit a good congruency to the  
589 anatomical reference, as evident from a close-up overlaid onto the mean ME image  
590 (Fig. 9D). In general, this visualization confirms the overall impression that the echo  
591 combination increases CNR throughout visual cortex, rather than just in regions of higher  
592 dephasing. Remarkably, there seem to be more false positive clusters for the spiral-in  
593 than in all other spiral variants (Fig. 9A), in particular close to the temporal muscle,  
594 presumably due to the ringing mentioned above.

595

## 596 **4 Discussion**

### 597 **4.1 Summary**

598 In this work, we demonstrated that recent advances in high-resolution, single-shot spiral  
599 imaging (Engel et al., 2018) can be deployed to fMRI. The typical drawbacks of spiral  
600 fMRI, which have so far limited its routine use, were overcome by an expanded signal  
601 model, accurate measurement of its components, and corresponding iterative image  
602 reconstruction (Barmet et al., 2005; Pruessmann et al., 2001; Wilm et al., 2011).

603 Specifically, time series of high image quality and stability were obtained that exhibited  
604 geometric congruency to anatomical scans without the need for post-hoc distortion  
605 correction. Notably, also the corresponding phase images exhibit high raw data quality  
606 (without any postprocessing, e.g., phase unwrapping), and suggest the suitability of spiral  
607 acquisition for novel phase- or complex-value based fMRI analysis workflows (Balla et al.,  
608 2014; Bianciardi et al., 2014; Calhoun et al., 2002; Menon, 2002).

609 The functional sensitivity of spiral readouts was confirmed by observing typical activation  
610 patterns in response to an established visual quarter-field stimulation. While a consensus  
611 on how to assess spatial specificity for fMRI is lacking, several indicators point to a  
612 localization capability in the sub-mm range for our data. First, the distance of gray matter  
613 contours in spiral and structural MRI data were at most one voxel (0.8 mm) apart in the  
614 vast majority of voxels per subject (76 %). Second, the activation patterns of different  
615 stimulus conditions could be discriminated in neighboring voxels of 0.8 mm nominal  
616 resolution (Fig. 6). Third, the vast majority (75 %) of significant activation sites were  
617 contained within gray matter or at its boundaries, suggesting a limited impact of  
618 artifactual blurring.

619 Finally, we demonstrated the versatility of this approach to spiral fMRI with a combined  
620 in/out readout at a more typical resolution (1.5 mm). Here, the high acquisition efficiency

## Advances in Spiral fMRI

621 of the spiral allowed to measure two images per shot, increasing CNR by about 20 %. The  
622 observed discrepancy to previously reported gains of more than 50 % for signal-weighted  
623 echo combination (Glover and Thomason, 2004) is in line with recent spiral fMRI studies  
624 (Singh et al., 2018). It might result from higher target resolution and static off-resonance  
625 correction employed in our study and (Singh et al., 2018), compared to the original work.  
626 The increased image congruency and smaller dephasing effects between the in- and out-  
627 part compared to low-resolution spirals may reduce the impact of echo combination. Still,  
628 more sophisticated combination of echo images (Glover and Thomason, 2004), or of k-  
629 space data during reconstruction (Jung et al., 2013) could result in further SNR increases.

630 In summary, the presented advances render spiral fMRI an attractive sampling scheme  
631 that delivers on the long-time postulate of high acquisition efficiency without  
632 compromising image quality. Here, the spatiotemporal application domain of fMRI on a  
633 standard gradient system was enhanced by acquiring a 230x230x36 mm FOV brain image  
634 at 0.8 mm nominal in-plane resolution (i.e., a matrix size of 288x288x36) while  
635 maintaining a TR typical for high-resolution fMRI (3.3 s). This corresponds to an  
636 acquisition efficiency of about 900,000 resolved voxels per second.

637 To our knowledge, this is the highest acquisition efficiency reported for 2D spiral fMRI to  
638 date (see Table SM 5 for a comparison of sequence parameters in several spiral fMRI  
639 studies), as well as the first high-resolution spiral fMRI study at ultra-high field. In  
640 combination with the presented evidence for geometric accuracy, this makes the  
641 presented spiral-out sequence an attractive candidate for high-resolution applications of  
642 fMRI, studying the functional sub-organization of cortex, e.g., in laminae or columns  
643 (Cheng et al., 2001; Feinberg et al., 2018; Fracasso et al., 2016; Huber et al., 2017a; Kok et  
644 al., 2016; Koopmans et al., 2010; Lawrence et al., 2018; Martino et al., 2015; Muckli et al.,  
645 2015; Siero et al., 2011; Uğurbil et al., 2013; Yacoub et al., 2008).

## Advances in Spiral fMRI

### 646 4.2 Effective Resolution, Spatial Specificity and Congruency

647 The claim of high acquisition efficiency for fMRI hinges on whether the acquired voxels  
648 effectively resolve distinct activation. This question of *effective* functional resolution  
649 arises for any fMRI protocol and comprises global aspects, such as PSF broadening, as  
650 well as more localized effects concerning geometric congruency and spatial specificity of  
651 the activation mapping.

652 The circular k-space coverage of spirals leads to a broadening of the PSF main lobe by  
653 17 % compared to Cartesian k-space coverage in EPI (1.4 vs 1.2 times the voxel size (Qin,  
654 2012)). Furthermore, any sequence with long readout duration encounters considerable  
655  $T_2^*$  signal decay along the trajectory, which manifests as a filter in image domain. For  
656 spiral-in images, this emphasizes higher spatial frequencies, while the effect on spiral-out  
657 images is reversed, leading to blurring. Based on typical brain tissue relaxation times at  
658 7T, we adapted previous simulations of this effect for a similar high-resolution spiral-out  
659 protocol (Fig. 7 in Engel et al., 2018). There are diminishing returns for investing more  
660 acquisition time to achieve higher in-plane resolution, but a net gain remains at our  
661 chosen readout duration of 60 ms. Effectively, the FWHM of the PSF due to  $T_2^*$  blurring  
662 corresponds to a voxel size smaller than 1 mm for the targeted 0.8 mm nominal  
663 resolution, while at 40 ms readout duration actual voxels are larger than 1.1 mm for a  
664 targeted 1 mm nominal resolution. Still, choosing shorter readouts with slightly coarser  
665 resolution in favor of sampling more slices within the given TR might deliver overall  
666 higher acquisition efficiency in this case. Finally, static  $B_0$  inhomogeneity also manifests  
667 as spatially varying blurring or ringing in spiral imaging, because off-resonance induces  
668 broadening of the PSF main lobe, as well as amplification of its side lobes (Bernstein et  
669 al., 2004, Chap. 17; Fig. 6 in Engel et al., 2018; Man et al., 1997). As long as  $B_0$   
670 inhomogeneity is properly mapped and included in the signal model, this effect is  
671 mitigated by the iterative image reconstruction utilized in this work.

## Advances in Spiral fMRI

672 In our experimental data, we found that the spatial specificity of spiral fMRI is very high  
673 in about 75-80 % of the voxels, as indicated by both contour distance mapping (Fig. 5)  
674 and gray matter containment of activation (Fig. 8). While these quantifications provide  
675 rough estimates of functional spatial specificity in fMRI, there is no consensus on such  
676 quantification in the community, and the absolute values reported here are hard to  
677 compare to previous work. We hope that through our sharing of the code, this  
678 methodology may provide future reference points. Furthermore, the utilized measures are  
679 in themselves imperfect assessments of spatial specificity, and might underestimate the  
680 achieved spatial specificity in our data. First of all, both analyses relied on unified  
681 segmentation (Ashburner and Friston, 2005) to extract tissue probability maps, which in  
682 principle should work contrast-independently. However, the employed default parameter  
683 settings may not be optimal to model bias fields at 7 T or voxel intensity distributions of  
684 multi-echo GRE scans with only partial brain coverage. Additionally, because the contrast  
685 in our functional and structural scans were not equivalent (e.g., TE 20 vs 10 ms), contour  
686 distance mapping reflects, to a certain extent, differences in contrast rather than  
687 geometry.

688 Finally, relying on a perfect retinotopic organization of visual cortex for assessing  
689 functional spatial specificity has also limitations. For example, receptive fields can cross  
690 the vertical meridian (especially in higher visual areas), such that differential contrasts of  
691 quarterfield stimulation may not flip between adjacent voxels (Fig. 6C). Similarly,  
692 overlapping voxel activation or single-voxel “false positives” (Fig. 6D) may indicate  
693 imperfections in the visual field leading to non-compact retinotopic representations,  
694 rather than losses in spatial specificity.

695 Another contentious point concerning spatial specificity is our choice of moderately  
696 smoothing the data (FWHM 0.8 mm) before statistical parametric mapping. While  
697 smoothing is a standard preprocessing step in the majority of fMRI studies, high-  
698 resolution applications, such as retinotopic mapping or layered fMRI analyses, frequently

## Advances in Spiral fMRI

699 abstain from it or use more spatially informed averaging *methods* (Blazejewska et al.,  
700 2019). From a conceptual point of view, smoothing alters the target PSF of the imaging  
701 process in multiple ways that affect the effective resolution: On the one hand, a Gaussian  
702 filter, as employed here, broadens the PSF main lobe (PSF) reducing spatial specificity.  
703 On the other hand, it suppresses PSF side lobes and thus contamination by remote  
704 locations, which enhances spatial specificity. The opposite is true for an edge or high-pass  
705 filter, as implemented, for example, by multiplying the inverse of the  $T_2^*$  decay curve onto  
706 the k-space data. Overall, resolution can be re-negotiated by appropriate filtering, which  
707 has to be adapted to the specific application, in order to provide optimal specificity.

708 For our spiral data in particular, the decision to smooth was governed by another goal of  
709 filtering, namely, recovering sensitivity. Theoretically, sensitivity is maximized by a  
710 matched filter resembling the spatial activation extent, which is traditionally assumed to  
711 be a Gaussian for fMRI (Friston, 2007, Chap. 2; Kasper et al., 2014), but has, to our  
712 knowledge, not been determined for the ultra-high-resolution regime in question here.  
713 Our choice of smoothing with an FWHM equivalent to the voxel size (instead of 2-3 times  
714 the voxel size as in standard fMRI) therefore constitutes a compromise between  
715 sensitivity and specificity, motivated by the noise levels in our raw data, the short run  
716 duration (5.5 min) and by having only one run acquired per subject and spiral sequence.  
717 This hampered our ability to quantify whether the investment into longer readouts of  
718 nominal 0.8 mm resolution, compared to 1 mm, translated into more spatially specific  
719 activation (supplementary material SM 4). More temporal averaging via longer and more  
720 numerous functional runs would allow to address this important research question in  
721 future studies.

## Advances in Spiral fMRI

### 722 **4.3 General Applicability and Limitations of Spiral Imaging Advances**

#### 723 **4.3.1 Rationale**

724 Increasing acquisition efficiency for high-resolution single-shot spirals while maintaining  
725 depiction quality, as presented here, resulted from the favorable interplay of the  
726 expanded signal model components: the encoding field dynamics with long-readout  
727 spirals, static  $B_0$  inhomogeneity characterization, and parallel imaging with iterative  
728 reconstruction enabling undersampling.

729 For deploying this advanced spiral functional imaging to other sites and systems, it is  
730 important to evaluate how individual aspects of the approach contribute to its overall  
731 performance, and to assess the generalizability of our findings. This includes both the  
732 impact of model and system components, as well as the utilized methodology for their  
733 characterization, in relation to possible alternatives and extensions.

#### 734 **4.3.2 Magnetic Field Monitoring**

735 In terms of availability, the concurrent field monitoring hardware employed in our  
736 approach (Barnett et al., 2008; Engel et al., 2018; Kasper et al., 2018; Wilm et al., 2017,  
737 2011), is probably the scarcest resource across sites. It serves to characterize both the  
738 reproducible and irreproducible imperfections of the encoding magnetic fields.

739 For reproducible field effects, such as the actual spiral trajectory performed by the system  
740 and its induced eddy currents, previous work has shown that their characterization is  
741 often required to avoid severe image artifacts (Engel et al., 2018, Fig. 6; Vannesjo et al.,  
742 2016). This, however, might vary between systems, as successful spiral image  
743 reconstructions based on nominal trajectories have been reported (Kurban et al., 2019;  
744 Singh et al., 2018). If image artifacts arise from reproducible trajectory imperfections, they  
745 could be measured without concurrent field monitoring hardware by calibration  
746 approaches in a separate scan session (Bhavsar et al., 2014; Duyn et al., 1998; Robison et



## Advances in Spiral fMRI

747 al., 2019, 2010). For more flexibility, the gradient impulse response function (GIRF) to  
748 arbitrary input trajectories can be modelled from such data under linear-time invariant  
749 system assumptions (Addy et al., 2012; Campbell-Washburn et al., 2016; Rahmer et al.,  
750 2019; Vannesjo et al., 2014, 2013). The required field measurements for these calibrations  
751 may either rely on dedicated NMR-probe based field cameras (Barmet et al., 2008;  
752 Vannesjo et al., 2014, 2013; Zanche et al., 2008) or on off-the-shelf NMR phantoms (Addy  
753 et al., 2012; Duyn et al., 1998; Rahmer et al., 2019), with certain trade-offs to measurement  
754 precision and acquisition duration (Graedel et al., 2017).

755 For the dynamic field effects, induced by the system (e.g., drifts through gradient  
756 heating), as well as the subject (e.g., fluctuations with the breathing cycle or limb  
757 motion), few studies have analyzed their impact on spiral fMRI time series (Pfeuffer et al.,  
758 2002). In principle, the concurrent field monitoring and reconstruction employed here  
759 incorporated changes of global off-resonance and k-space with the bandwidth of the  
760 trajectory measurement of about 4 Hz (monitoring every third slice). As we did not  
761 observe any conspicuous problems in the time series statistics, for example, SFNR drops,  
762 nor any indication of time-dependent blurring, which would be the spiral equivalent to  
763 apparent motion in phase encoding direction observed in EPI (Bollmann et al., 2017;  
764 Power et al., 2019), this approach presumably addressed the majority of field fluctuations  
765 present in our data. This is in line with previous results of breathing-induced field  
766 fluctuations reported at 7T in spiral fMRI of only a few Hz for healthy subjects and  
767 normal breathing (Pfeuffer et al., 2002). An in-depth analysis of these effects is beyond  
768 the scope of this paper, as it would, for example, entail quantitative comparisons with  
769 nominal or GIRF reconstructions (Vannesjo et al., 2016), as well as simulating the impact  
770 of different measured field components on image time series, similar to work previously  
771 conducted for EPI (Bollmann et al., 2017; Kasper et al., 2015). As we do believe that this  
772 investigation is relevant to the neuroimaging community, we provide the field dynamics  
773 of all spiral-out fMRI runs in ISMRMRD format for further scrutiny.

## Advances in Spiral fMRI

774 Note, however, that the dataset in itself might not be representative for assessing the  
775 utility of concurrent field monitoring for spiral fMRI. In terms of system fluctuations, we  
776 did have a challenging gradient duty-cycle (with gradients switched on during 70 % of the  
777 sequence, 50 % of the time at amplitude maximum), leading to substantial heating of 15  
778 degrees throughout the 5.5 min high-resolution spiral-out sequence, as measured using 5  
779 optical sensors cast into the gradient coil (Dietrich et al., 2016b). This actually limited the  
780 duration of our functional runs. While system fluctuations might thus be particularly  
781 pronounced in our data, the subject-induced fluctuations will be moderate, because all  
782 volunteers were young, healthy individuals instructed to lie still throughout the session.  
783 This is reflected in the small mean framewise displacement (FD) encountered in all  
784 subjects (mean FD and standard deviation over subjects  $0.09 \pm 0.04$  mm, see SM 6 for  
785 motion and FD traces). For a comprehensive assessment, instructed limb motion and  
786 deep breathing, a range of BMIs and body shapes would have to be included in the design  
787 of the study, similar to evaluations of field effects on structural  $T_2^*$  imaging (Duerst et al.,  
788 2016). Finally, in terms of the chosen imaging FOV covering the visual cortex, dynamic  
789 field effects will be at an intermediate level, with maximum fluctuations expected in  
790 inferior regions closer to the chest (brainstem, cerebellum) and minimum effects near  
791 the top of the head (e.g., motor cortex).

792 If dynamic field effects constitute a significant artifact and noise source for spiral fMRI  
793 time series, in lieu of field monitoring, alternative correction methods comprise dynamic  
794 off-resonance updates or higher-order field navigators (Pfeuffer et al., 2002; Splitthoff and  
795 Zaitsev, 2009), as well as gradient response models that incorporate time-courses of  
796 gradient coil temperature (Dietrich et al., 2016b; Stich et al., 2020) or current  
797 measurements (Nussbaum et al., 2019; Rahmer et al., 2021).

### 798 4.3.3 Static $B_0$ Inhomogeneity

799 To characterize static  $B_0$  inhomogeneity, we acquired a Cartesian multi-echo gradient  
800 echo scan with rather high resolution (1 mm). Including this information in the signal

## Advances in Spiral fMRI

801 model has previously been crucial to maintain spatial specificity in spiral imaging at 7T  
802 (Engel et al., 2018, Fig. 6; Kasper et al., 2018, Fig. 7).

803 The  $B_0$  maps obtained in this work exhibited considerable inhomogeneity, even after 3<sup>rd</sup>  
804 order shimming of the targeted 4 cm oblique-transverse slab of the brain including the  
805 visual cortex. For the  $B_0$  map of a single subject (SPIFI\_0007) provided in the  
806 accompanying Data In Brief article (see "Code and data availability" section), 20 % of  
807 brain voxels were more than 50 Hz off-resonant, which – if uncorrected for – would incur  
808 blurring with FWHMs of several voxels.

809 Thus, some form of static  $B_0$  inhomogeneity correction seems indispensable for providing  
810 high spiral image quality, and to correct this at the reconstruction stage via inclusion into  
811 the expanded signal model proved sufficient for most of the imaged brain slices.  
812 However, localized blurring, distortion and ringing artifacts remained at cortex  
813 boundaries close to the skull or air cavities, most prominently in orbitofrontal regions,  
814 and in the temporal lobe, above the ear canals, as well as in more inferior slices,  
815 particularly in the brainstem. Consequently, such regions might exhibit less sensitive and  
816 spatially less defined activation patterns than the ones in visual cortex evaluated here.

817 We did not evaluate whether our particular choice of  $B_0$  map resolution or processing  
818 contributed to the accomplished image quality or its limitations. Alternative methods to  
819 determine  $B_0$  may provide similar results at reduced scan time, for example, slightly  
820 varying TEs during a spiral image time series to estimate the  $B_0$  map from their phase  
821 differences directly (Glover and Law, 2001; Singh et al., 2018) or joint estimation of  $B_0$  and  
822 image from the spiral data itself (Fessler, 2010; Hernando et al., 2008; Patzig et al., 2020).  
823 These methods also allow to regularly update  $B_0$  maps during long fMRI runs, increasing  
824 the alignment to the spiral acquisition geometry in case of subject motion.

## Advances in Spiral fMRI

### 825 **4.3.4 Iterative Parallel Imaging Reconstruction**

826 To enable single-shot imaging for maximum acquisition efficiency, we also relied on the  
827 coil sensitivity profiles for spatial encoding, i.e., parallel imaging. Spiral trajectories are  
828 particularly suited for this form of acceleration, because they possess favorable behavior  
829 in terms of spatial noise amplification by the coil geometry factor, allowing for higher k-  
830 space undersampling (Larkman, 2007; Lee et al., 2021).

831 For our data with in-plane acceleration factors of 4 using a 32-channel receive array at 7 T  
832 this was confirmed through the SD maps of the time series data, which did not exhibit  
833 spatially structured residual aliasing or noise patterns. This also points to the robustness  
834 of the reconstruction to motion-induced mismatch of measured and actual coil  
835 sensitivities.

836 Compared to Nyquist-sampled spiral data, which could be reconstructed via gridding and  
837 conjugate phase correction for static off-resonance effects (Singh et al., 2018 and  
838 references therein), parallel imaging of non-Cartesian trajectories typically necessitates  
839 iterative reconstruction schemes (Heidemann et al., 2006; Lustig and Pauly, 2010;  
840 Pruessmann et al., 2001; Weiger et al., 2002; Wright et al., 2014). Depending on the  
841 number of iterations and precision of the off-resonance correction, these algorithms are  
842 one or two orders of magnitude slower than direct reconstruction methods. Note,  
843 however, that the reconstruction times reported here will not present a general hurdle for  
844 deployment, because our Matlab code was not optimized for speed. The numerous  
845 matrix-vector multiplications (eq. 5) burden the CG algorithm most, and an  
846 implementation on graphical processing units (GPUs) will significantly accelerate  
847 reconstruction. High-performance implementations of the conjugate gradient iterative  
848 reconstruction algorithm, including off-resonance correction, are publicly available in  
849 different MR reconstruction packages, and we have successfully tested reconstruction of  
850 the example data presented here in MRIReco.jl (Knopp and Grosser, 2021), written in the  
851 modern scientific programming language Julia (Bezanson et al., 2017).

## Advances in Spiral fMRI

### 852 **4.3.5 Ultra-high field Magnet (7T) and Gradients**

853 Finally, the availability of an ultra-high field system may be seen as a limitation for the  
854 advances presented here. We implemented the spiral sequences at 7T, which has shown  
855 particular utility for high-resolution functional MRI due to its superlinear increase in  
856 BOLD CNR (Uludağ and Blinder, 2018). From an image reconstruction perspective, this is  
857 a challenging scenario, because both static and dynamic field perturbations are  
858 exacerbated at ultra-high field and deteriorate conditioning of the expanded signal  
859 model. Thus, the adoption of the presented advances in spiral fMRI to lower field  
860 strengths (e.g., 3T) not only seems straightforward and worthwhile, but also offers  
861 benefits. For example, spiral readouts could be prolonged in light of the more benign field  
862 perturbations, mitigating the lower CNR while maintaining high image quality.

863 Our gradient system, on the other hand, had standard specifications, available on most  
864 sites (utilized gradient amplitude 31 mT/m, slew rate 160 T/m/s). Already here, spiral  
865 trajectories offered reduced readout times of 19 % compared to EPI due to their higher  
866 average speed covering k-space. Because the last 80 % (45 ms) of our high-resolution  
867 spiral gradient waveform were amplitude-limited (Fig. 1, black waveform), this  
868 acceleration could be considerably increased by dedicated gradient hardware with higher  
869 maximum gradient strength, e.g., high-performance whole-body “connectome” gradient  
870 coils (Kimmlingen et al., 2012) or insert gradients for head imaging (Foo et al., 2018;  
871 Weiger et al., 2018).

### 872 **4.4 Translation to other fMRI applications**

873 This work focused on two-dimensional, slice-selective spiral BOLD imaging.  
874 Simultaneous multi-slice (SMS) or 3D excitation schemes offer a complementary means  
875 of acceleration, by extending sensitivity encoding to the third encoding (slice) dimension,  
876 as, e.g., in stack-of-spiral trajectories (Deng et al., 2016; Engel et al., 2021; Zahneisen et al.,  
877 2014), which also provides SNR benefits (Poser et al., 2010). The expanded signal model

## Advances in Spiral fMRI

878 and image reconstruction framework employed here, apart from the 2D-specific  
879 simplifications, are equally applicable to this scenario (Engel et al., 2021; Pruessmann et  
880 al., 2001; Zahneisen et al., 2015).

881 Furthermore, the successful deployment of the in/out spirals here suggests the feasibility  
882 of other dual-echo variants, such as out-out or in-in acquisition schemes. In particular,  
883 recent correction methods for physiologically or motion-induced noise that rest on multi-  
884 echo acquisition (Kundu et al., 2012; Power et al., 2018) could profit considerably from  
885 spiral-out readouts: compared to EPI, the shorter minimum TE provides first-echo  
886 images with reduced  $T_2^*$ - weighting and should enhance disentanglement of BOLD- and  
887 non-BOLD related signal fluctuations.

888 Beyond BOLD, the adaptation of single-shot spiral acquisition for other time series  
889 readouts seems promising. In particular fMRI modalities with different contrast  
890 preparation (Huber et al., 2017b), such as blood-flow sensitive ASL (Detre et al., 2012,  
891 1992), and blood-volume sensitive VASO (Huber et al., 2018; Lu et al., 2013, 2003) benefit  
892 from the shorter TEs offered by spiral-out readouts. These sequences do not rely on  $T_2^*$   
893 decay for functional sensitivity, and thus minimizing TE leads to considerable CNR gains  
894 (Cavusoglu et al., 2017; Chang et al., 2017).

## 895 Acknowledgments

896 This work was supported by the NCCR “Neural Plasticity and Repair” at ETH Zurich and  
897 the University of Zurich (KPP, KES), the Clinical Research Priority Program of the  
898 University of Zurich, CRPP “Pain” (MMS, KES), the René and Susanne Braginsky  
899 Foundation (KES), the University of Zurich (KES) and the Oxford-Brain@McGill-ZNZ  
900 Partnership in the Neurosciences (NNG, OMZPN/2015/1/3). Technical support from  
901 Philips Healthcare, Best, The Netherlands, is gratefully acknowledged. The Wellcome

## Advances in Spiral fMRI

902 Centre for Integrative Neuroimaging is supported by core funding from the Wellcome  
903 Trust (203139/Z/16/Z).

904 We thank the reviewers for very constructive feedback that helped to considerably  
905 improve our manuscript, in particular the concrete suggestions regarding quantification  
906 of spatial accuracy of our spiral data via contour distance mapping. We are grateful to  
907 Roger Luechinger for technical support with scanning and data curation.

## 908 **Conflicts of Interest**

909 At the time of submission, Christoph Barmet and Bertram J. Wilm are employees of  
910 Skope Magnetic Resonance Technologies. Klaas P. Pruessmann holds a research  
911 agreement with and receives research support from Philips. He is a shareholder of  
912 Gyrotools LLC.

## Advances in Spiral fMRI

### 913 Figures

### 914 Figure 1

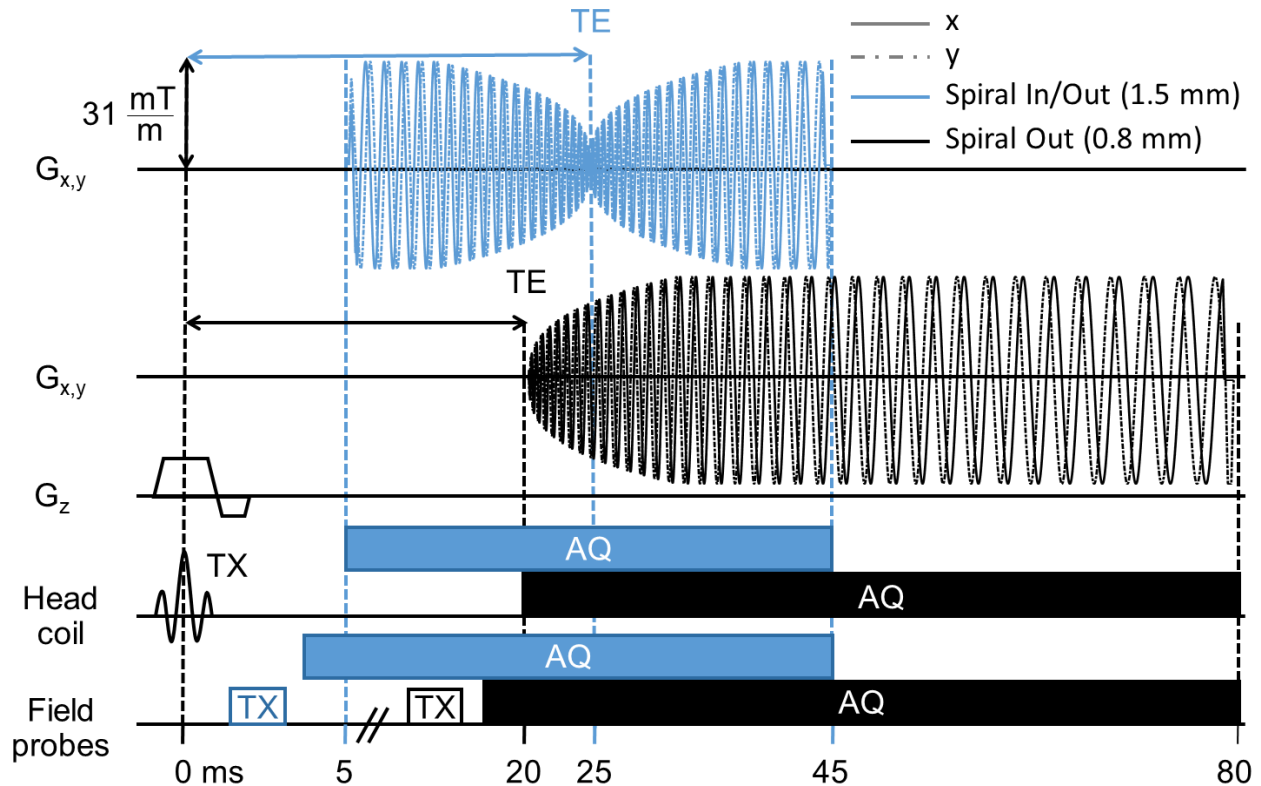

915 Utilized 2D single-shot spiral acquisitions ( $R = 4$  undersampling): High-resolution single-  
 916 shot spiral-out (nominal resolution 0.8 mm, black) and spiral in/out trajectory (1.5 mm  
 917 resolution, blue). Depicted are the gradient waveforms ( $G_x, G_y, G_z$ ) as well as RF excitation  
 918 (TX) and ADC sampling intervals (AQ) for both the  $^1\text{H}$  head coil and the  $^{19}\text{F}$  field probes  
 919 used to monitor the trajectories and other concurrent encoding fields. Field probe  
 920 excitation and acquisition start a few milliseconds before the spiral readout gradient  
 921 waveforms.  
 922

923



## Advances in Spiral fMRI

924 **Figure 2**

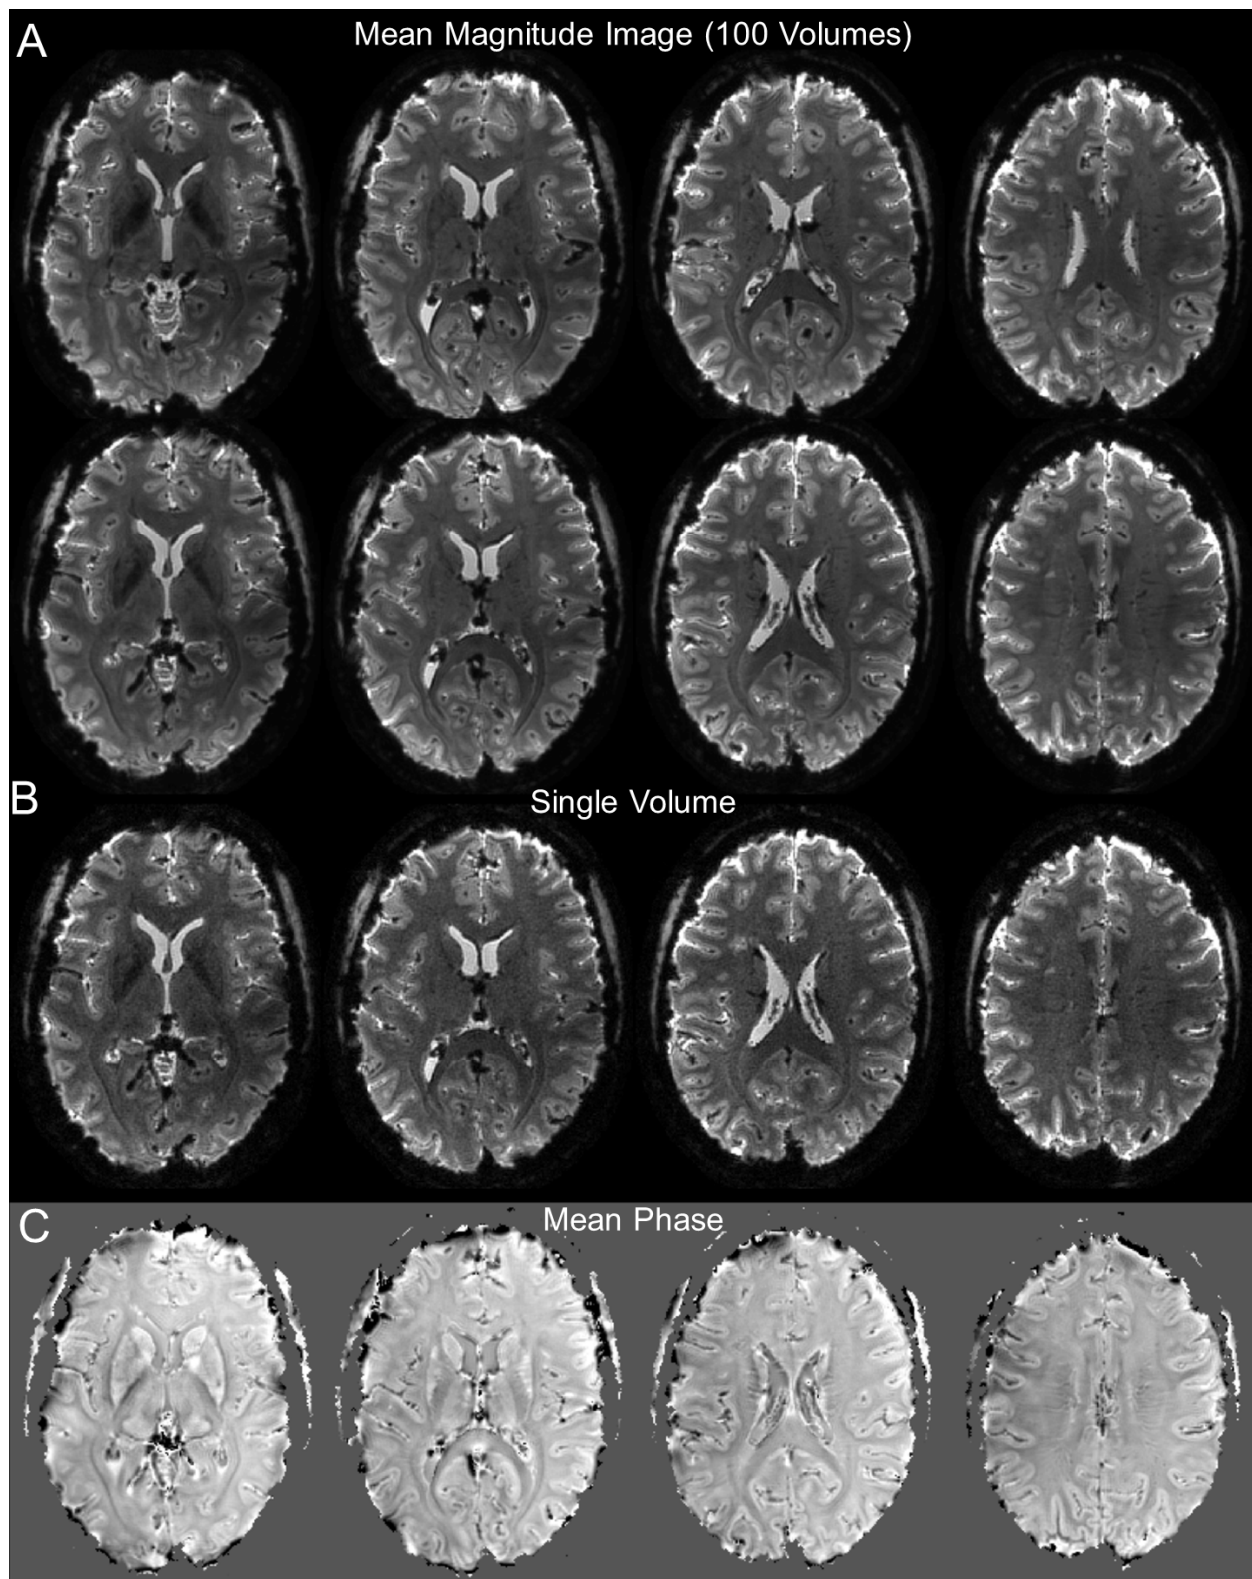

925

## Advances in Spiral fMRI

926 Overview of image quality for high-resolution (0.8 mm) single-shot spiral-out acquisition.  
927 (A) 8 oblique-transverse slices (of 36) depicting the time-series magnitude mean of one  
928 functional run (subject S7, 100 volumes). (B) Single-volume magnitude images for slices  
929 corresponding to lower row of (A). (C) Mean phase image over one run, without any post-  
930 processing, for slices corresponding to lower row of (A).

931

## Advances in Spiral fMRI

932 **Figure 3**

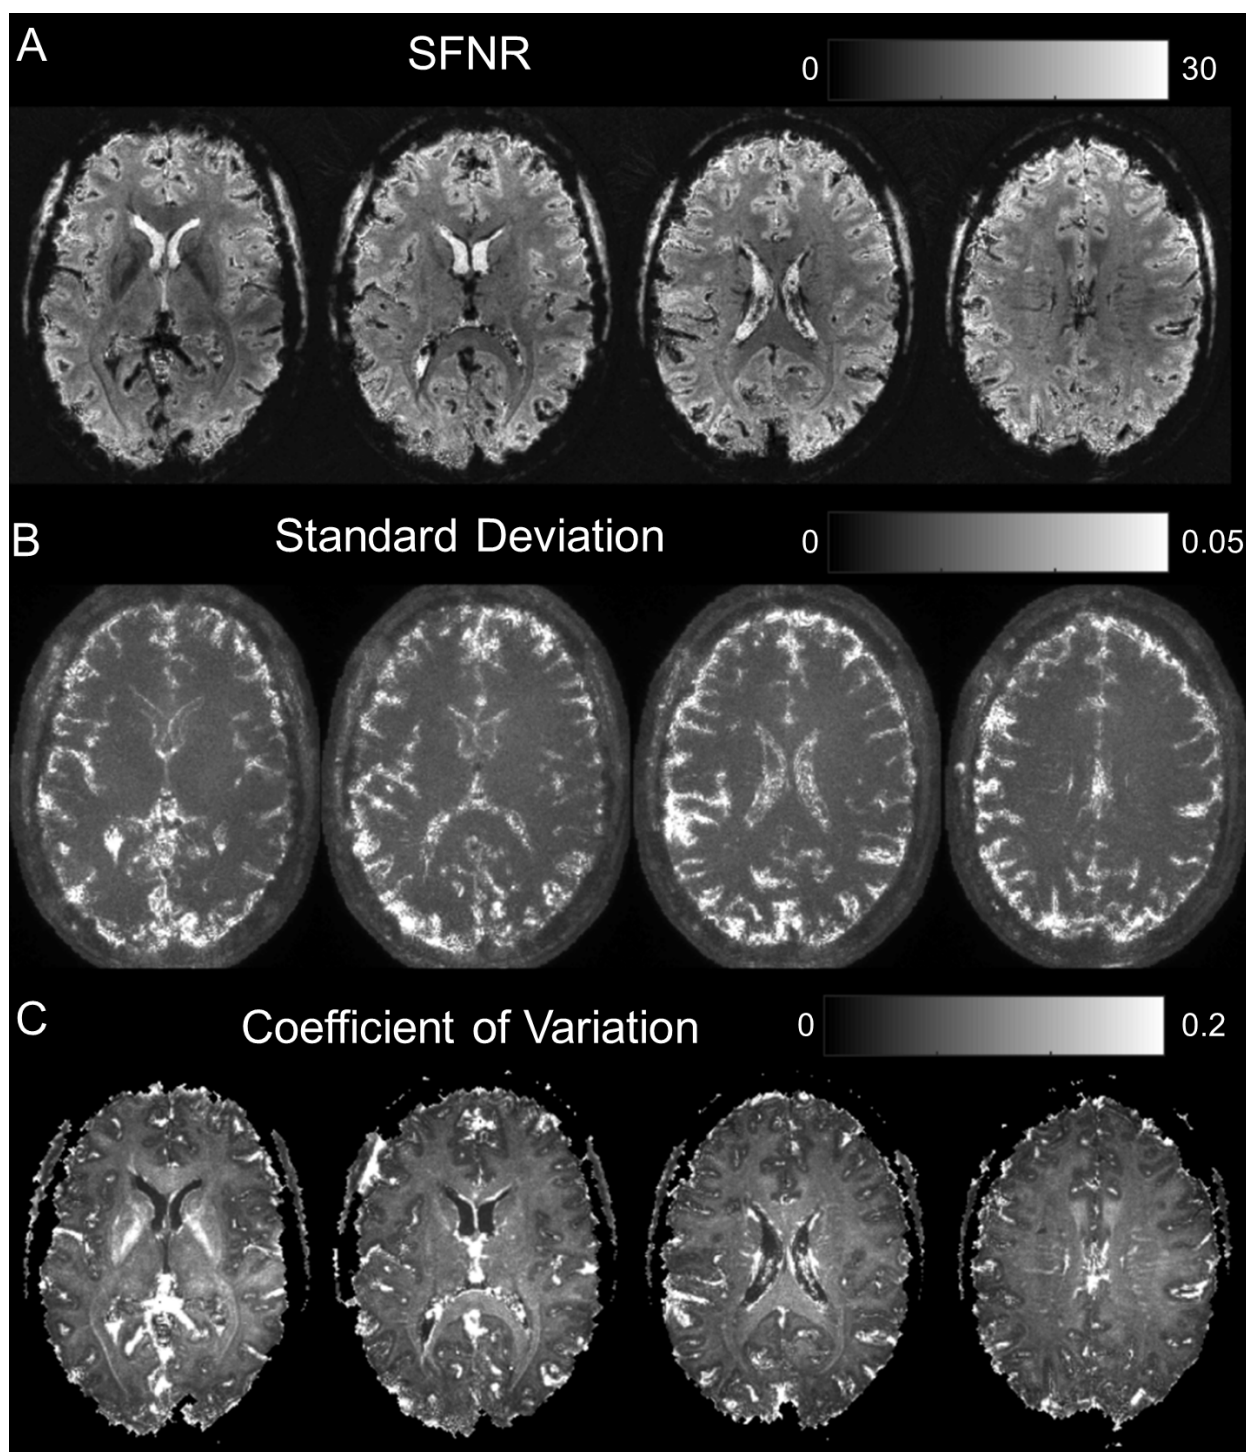

933

934 Characterization of image time series fluctuations over 1 spiral-out run (95 volumes,  
935 discarding first five). (A) Signal-to-Noise Fluctuation Ratio (SFNR) image for same slices

## Advances in Spiral fMRI

936 as in Fig 2. Rather homogeneous, exhibiting sufficient SFNR levels. (B) Standard deviation  
937 (SD) image over time. Regions of high fluctuation mainly include pulsatile areas close to  
938 ventricles or major blood vessels, and cortex/CSF interfaces. (C) Coefficient of Variation  
939 (CoV) image. Inverse of (A), highlighting regions of high fluctuations relative to their  
940 respective mean. Vascularized/CSF regions appear prominently, as well as the internal  
941 capsule, due to its reduced average signal level.

942

## Advances in Spiral fMRI

943 **Figure 4**

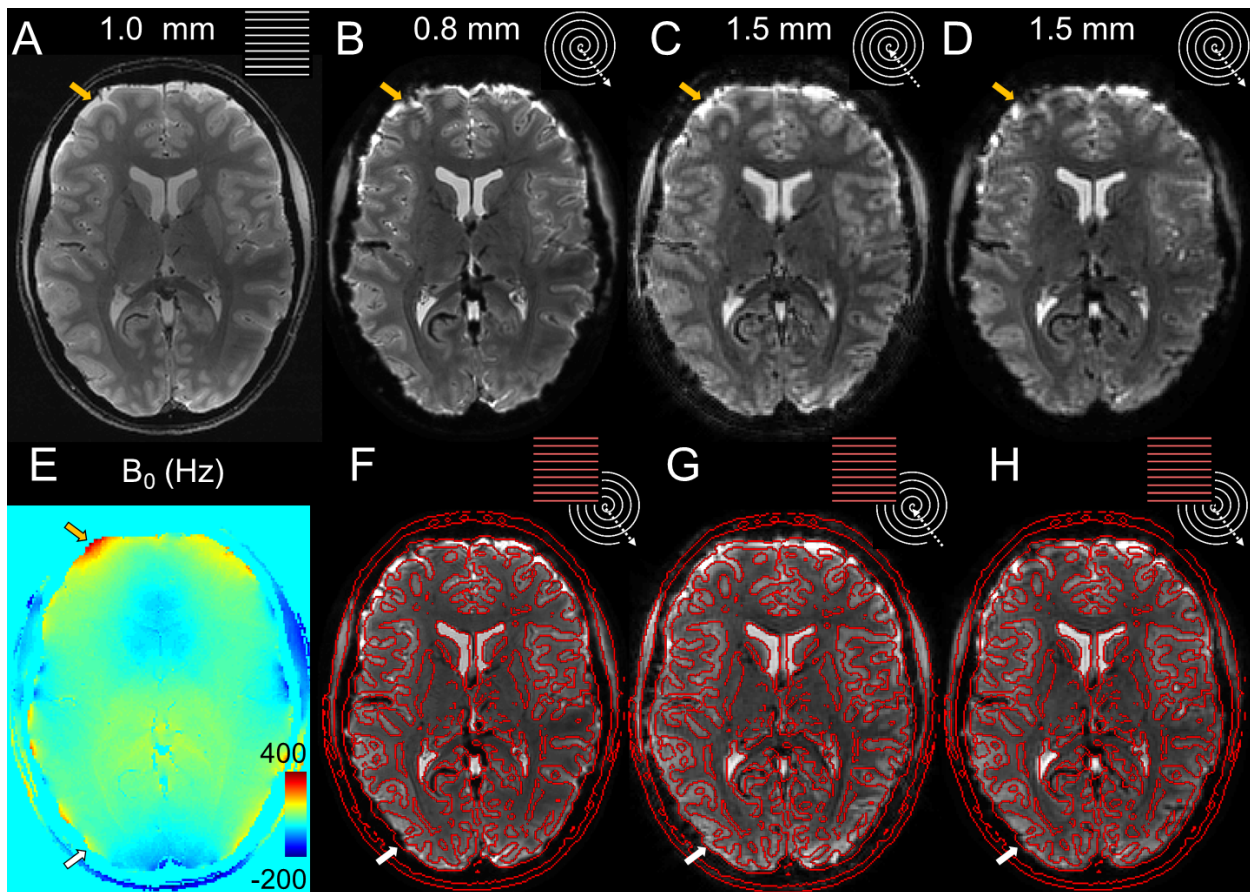

944

945 Image quality and geometric accuracy of spiral images, reconstructed with the expanded  
946 signal model. (A) Anatomical Reference: Mean multi-echo (ME) spin-warp image (1 mm  
947 resolution) (B) High-resolution (0.8 mm) spiral-out; (C) In-part of spiral in/out (1.5 mm);  
948 (D) Out-part of spiral in/out (1.5 mm). (E)  $B_0$ -map computed from (A). (F-H) Overlay of  
949 isoline contour edges from (A) onto (B)-(D).

950 Depicted are the mean images of a single run (subject S2, top row, B-D). The mean ME  
951 image (A), used to compute SENSE- and  $B_0$ -map (E) for the expanded signal model,  
952 provides the anatomical reference via its contours (red lines), overlaid onto the different  
953 spiral variants (bottom row, F-H). Arrows indicate residual geometric incongruence by  
954 through-plane dephasing (white) or incomplete  $B_0$  mapping and correction (yellow) in

## Advances in Spiral fMRI

955 the spiral-out, which are reduced in the out-part and absent in the in-part of the spiral-  
956 in/out sequence.

957

## Advances in Spiral fMRI

958 **Figure 5**

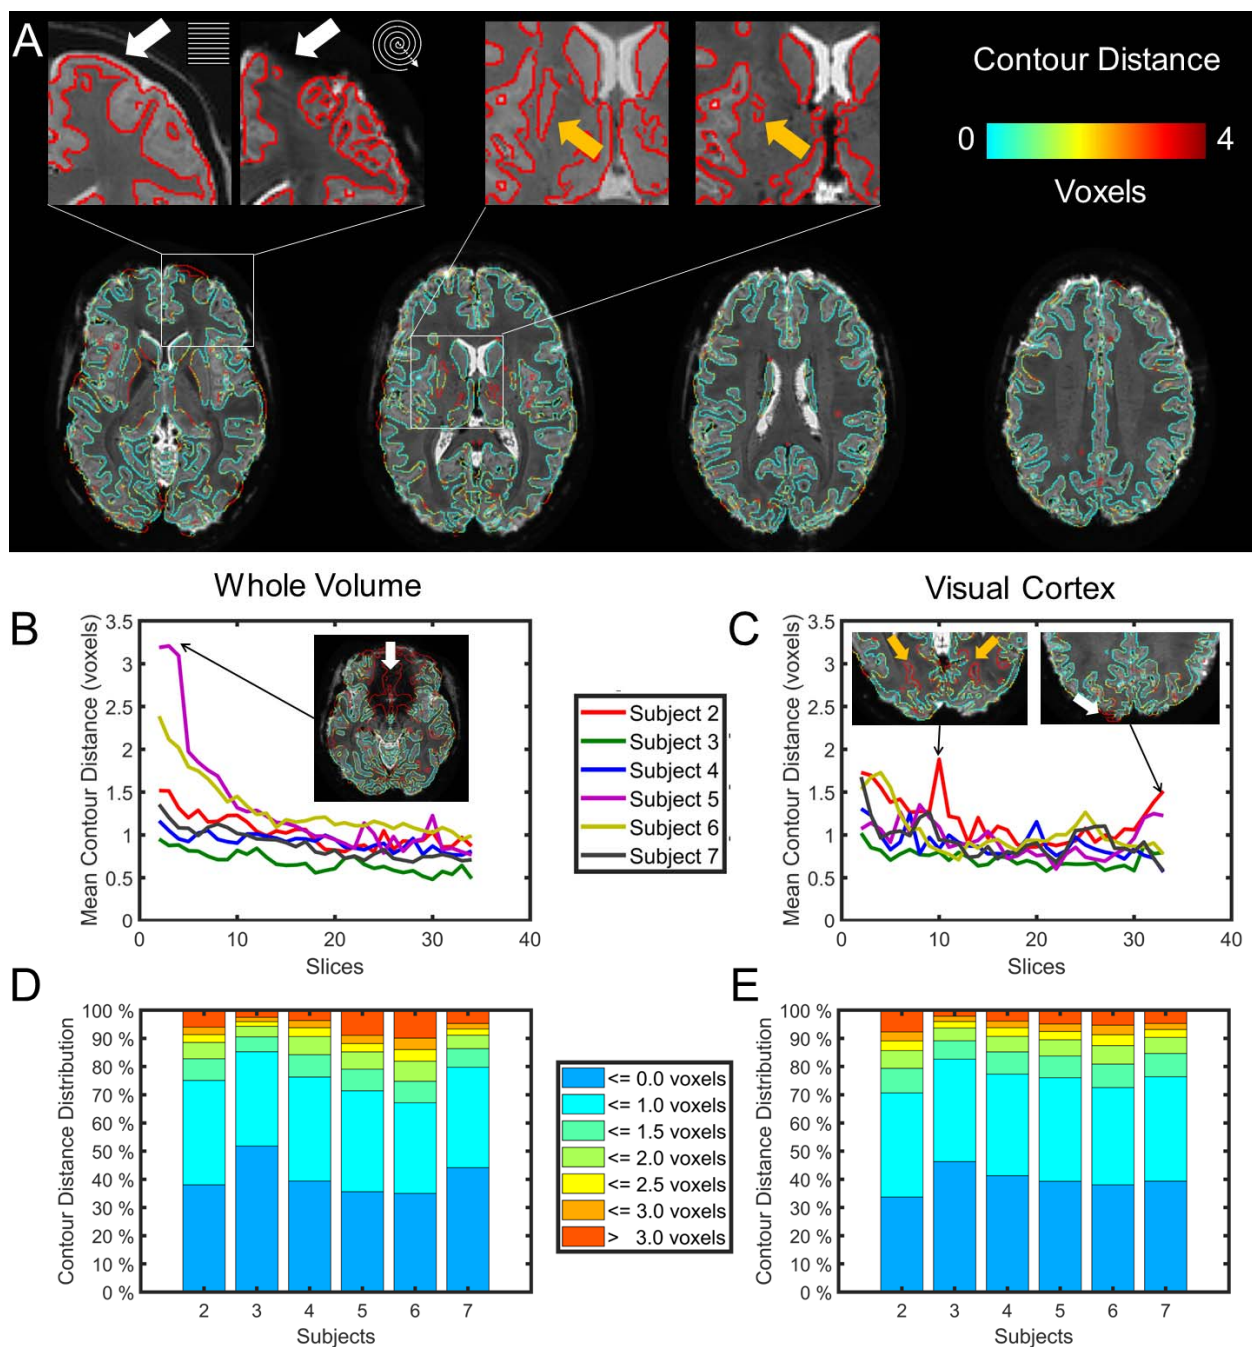

959

960 Quantification of spatial specificity in spiral images via contour distance mapping.  
 961 (A) Gray matter contours extracted from tissue probability maps (threshold 90 %) of the  
 962  $T_2^*$ -weighted structural image (TE 10 ms, echo 6 of ME scan), overlaid onto mean high-

## Advances in Spiral fMRI

963 resolution spiral-out image (subject S3). Color coding reflects distance to corresponding  
964 contour in segmented spiral image. Contour discrepancies are prevalent at tissue  
965 interfaces with high susceptibility gradients (left inset, white arrows), as well as areas  
966 with pronounced  $T_2^*$  contrast differences (right inset, yellow arrows). (B) Mean contour  
967 distance per slice for different subjects (averaged over all contours within each slice for  
968 the whole imaging volume). Average over subjects and slices:  $1.04 \pm 0.26$  voxels  
969 ( $0.83 \pm 0.21$  mm). Prominent outliers (subjects S5, S6) arose in inferior slices with  
970 considerable signal loss due to through-plane dephasing (sphenoid sinus, ear canals). (C)  
971 Mean contour distance per slice for different subjects, as in (C), but restricted to contours  
972 within a mask of early visual cortex. Average over subjects and slices:  $0.96 \pm 0.14$  voxels  
973 ( $0.77 \pm 0.11$  mm). Fewer outliers exist, mostly due to contrast differences and close to the  
974 sagittal sinus. (D) Distribution of contour distances per subject within the whole imaging  
975 volume.  $41 \pm 7$  % of gray matter contour voxels in all subjects were strictly overlapping,  
976 with  $76 \pm 7$  % at most 1 voxel apart and only  $11 \pm 5$  % exceeding a distance of 2 voxels  
977 (1.6 mm). (E) Distribution of contour distances per subject, as in (D), but restricted to a  
978 mask of early visual cortex. Near-identical distribution to (D), but fewer larger outliers  
979 ( $\geq 3$  voxels) in some subjects (S5, S6).

980



## Advances in Spiral fMRI

981 **Figure 6**

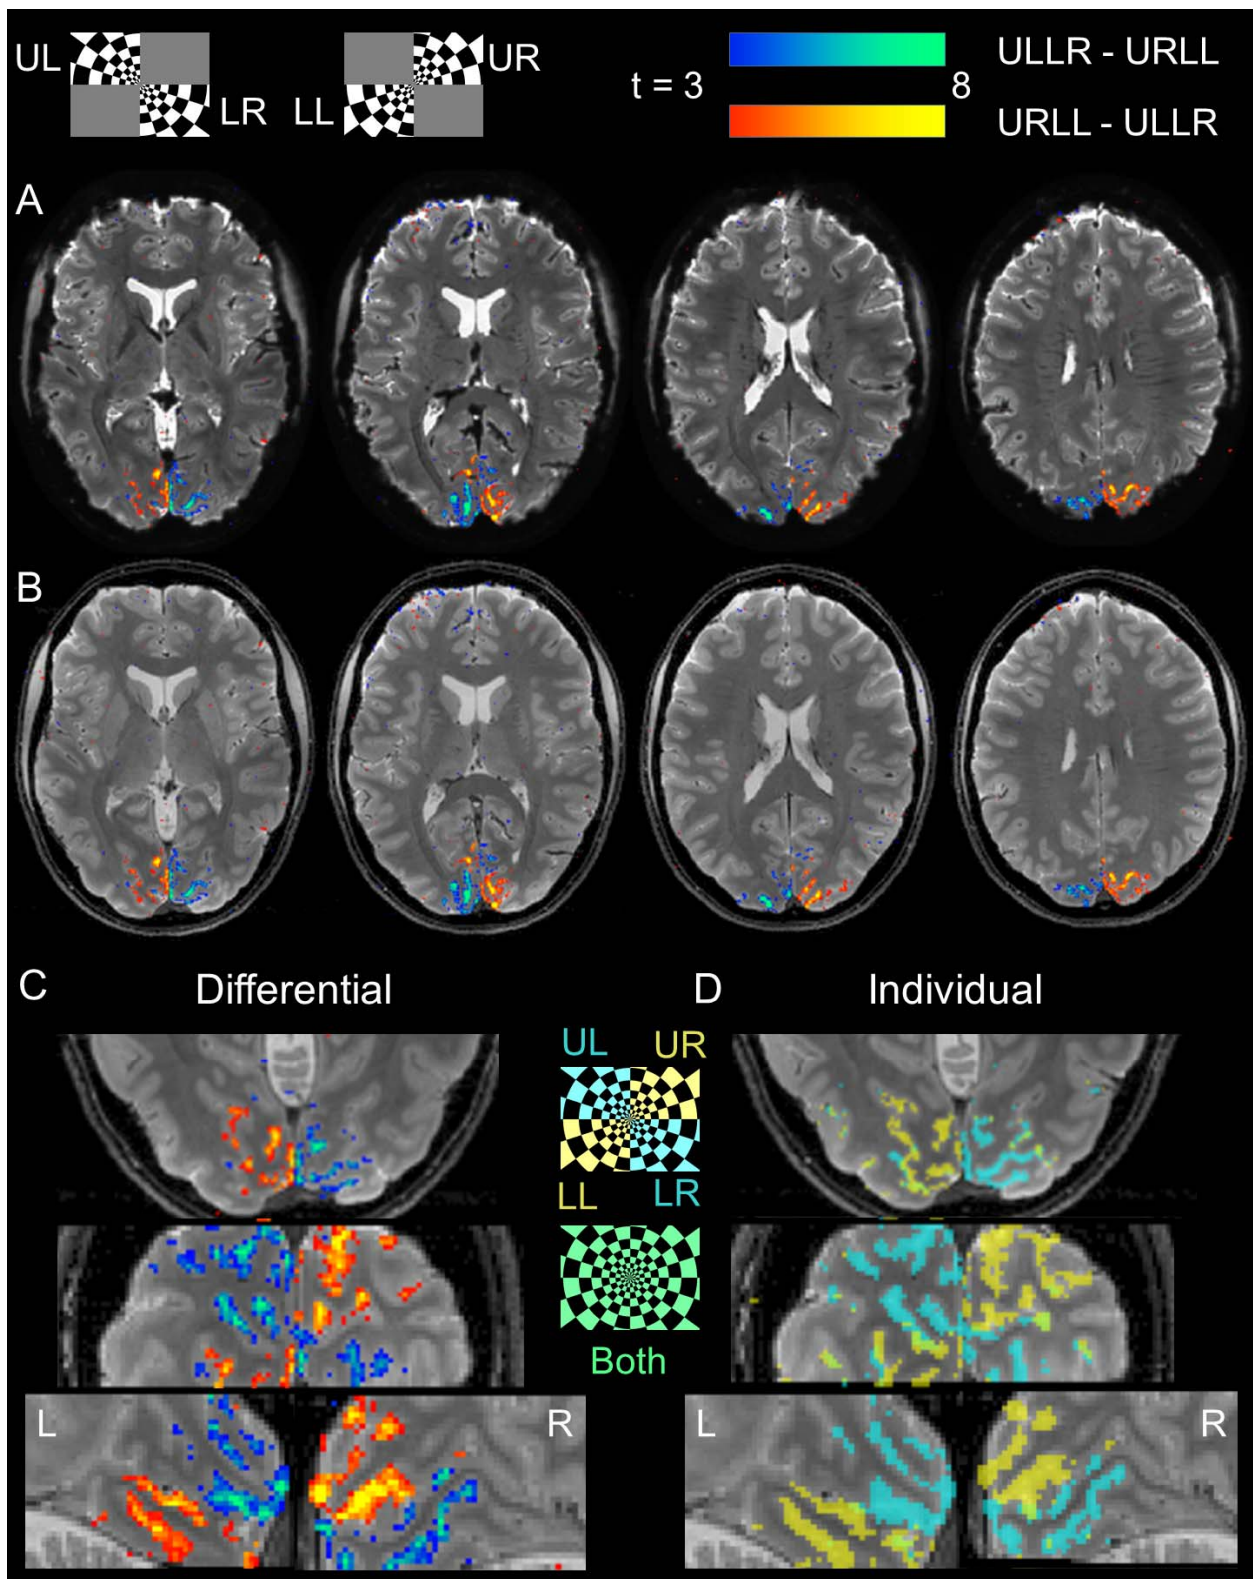

982

## Advances in Spiral fMRI

983 Visual Activation Maps of high-resolution (0.8 mm) spiral-out fMRI for a single subject  
984 (S<sub>2</sub>). Representative stimuli of both conditions (ULLR and URLL) are displayed at the top.  
985 (A) Overlay of differential t-contrast maps ( $p < 0.001$  uncorrected) on transverse slices of  
986 mean spiral image (hot colormap: URLL-ULLR, cool colormap: ULLR-URLL). (B) Same  
987 contrast maps as in (A), overlaid on mean ME image as anatomical reference. (C)  
988 Zoomed-in sections of differential t-contrast maps in different orientations: transverse  
989 (top), coronal (middle) and sagittal (bottom, left (L) and right (R) hemisphere). (D) t-  
990 contrast maps for individual conditions (blue: ULLR, yellow: URLL), showing more  
991 widespread activation and high spatial specificity, i.e., little spatial overlap (green).

992

## Advances in Spiral fMRI

993 **Figure 7**

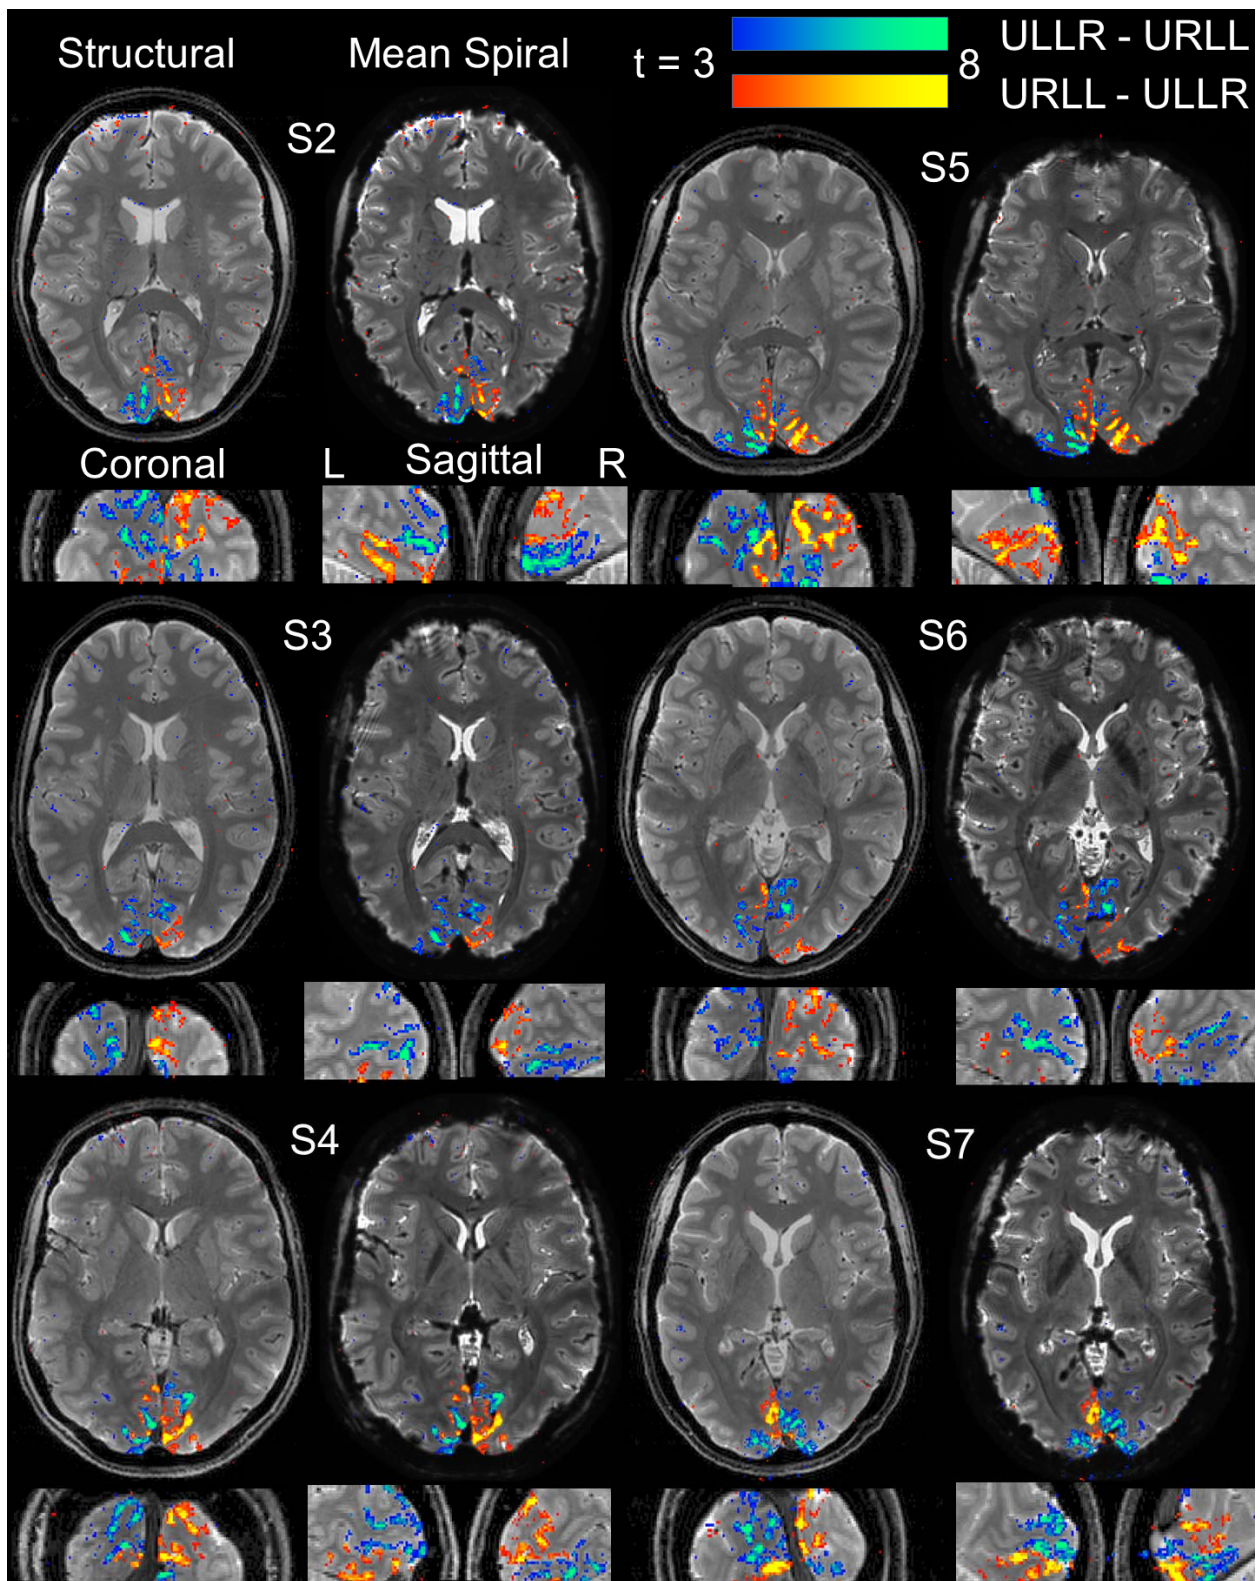

994

## Advances in Spiral fMRI

995 Mean spiral images and activation maps over subjects (S2-S7) for high-resolution spiral-  
996 out fMRI. For each subject, the following 4 sections are displayed, with the mean ME  
997 image as anatomical underlay: transverse, coronal and sagittal slice (for left (L) and right  
998 (R) hemisphere), each chosen for the maximum number of activated voxels (over both  
999 differential statistical t-contrasts,  $p < 0.001$  uncorrected). To assess raw spiral data quality,  
1000 the corresponding mean functional image is displayed side-by-side to the anatomical  
1001 transverse slice as an alternative underlay.

1002

## Advances in Spiral fMRI

1003 **Figure 8**

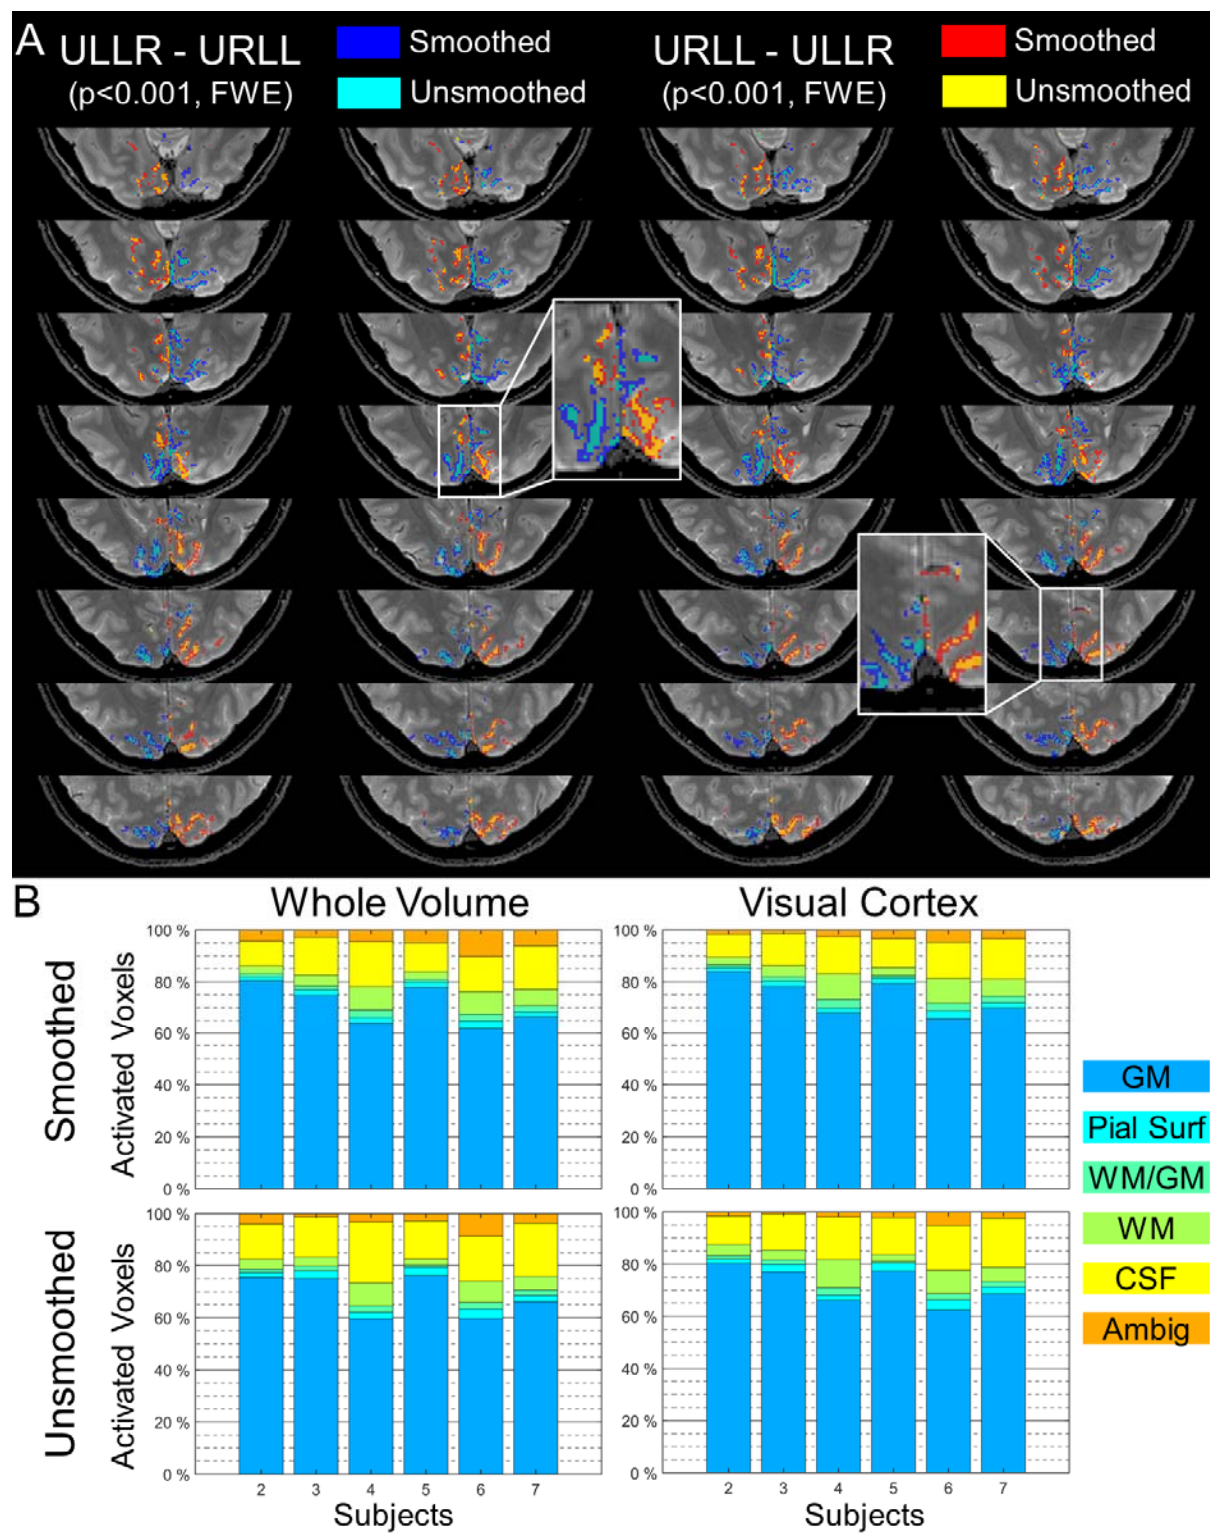

1004

## Advances in Spiral fMRI

1005 Spatial specificity of functional activation for high-resolution spiral-out fMRI. Analyses  
1006 are based on significant voxels over both differential t-contrasts (+/- ULLR-URLL,  $p < 0.05$   
1007 cluster-FWE corrected, cluster-forming threshold:  $p < 0.001$ ). (A) Comparison of  
1008 activation extent in smoothed (FWHM 0.8 mm) and unsmoothed data in a single subject  
1009 (S<sub>2</sub>). Masks of all significant voxels are overlaid for both t-contrasts based on smoothed  
1010 data (blue/red mask) as well as unsmoothed data (cyan/yellow masks). (B) Percentage of  
1011 significant voxels located in relevant tissue types, analyzed for smoothed (top row) and  
1012 unsmoothed (bottom row) data, as well as within whole imaging volume (left) and  
1013 restricted to a mask of early visual cortex (right) . Tissue types were identified by unified  
1014 segmentation of the structural (mean multi-echo) image, with 60 % exceedance threshold  
1015 for individual tissue classes (GM: gray matter, WM: white matter, CSF: cerebrospinal  
1016 fluid) and 30 % each for interfaces (Pial surface (GM/CSF), WM/GM surface), with the  
1017 remaining voxels categorized as ambiguous. On average, irrespective of smoothing and  
1018 ROI, the majority (74-78 %) of activation was contained in gray matter or adjacent  
1019 surfaces, with 6 % and 13-17 % residing in majority white matter and CSF voxels,  
1020 respectively. Gray matter containment was highest when smoothing the data and  
1021 restricting the analysis to the visual cortex, and lowest in the unsmoothed data  
1022 considered within the whole imaging volume.

1023

## Advances in Spiral fMRI

1024 **Figure 9**

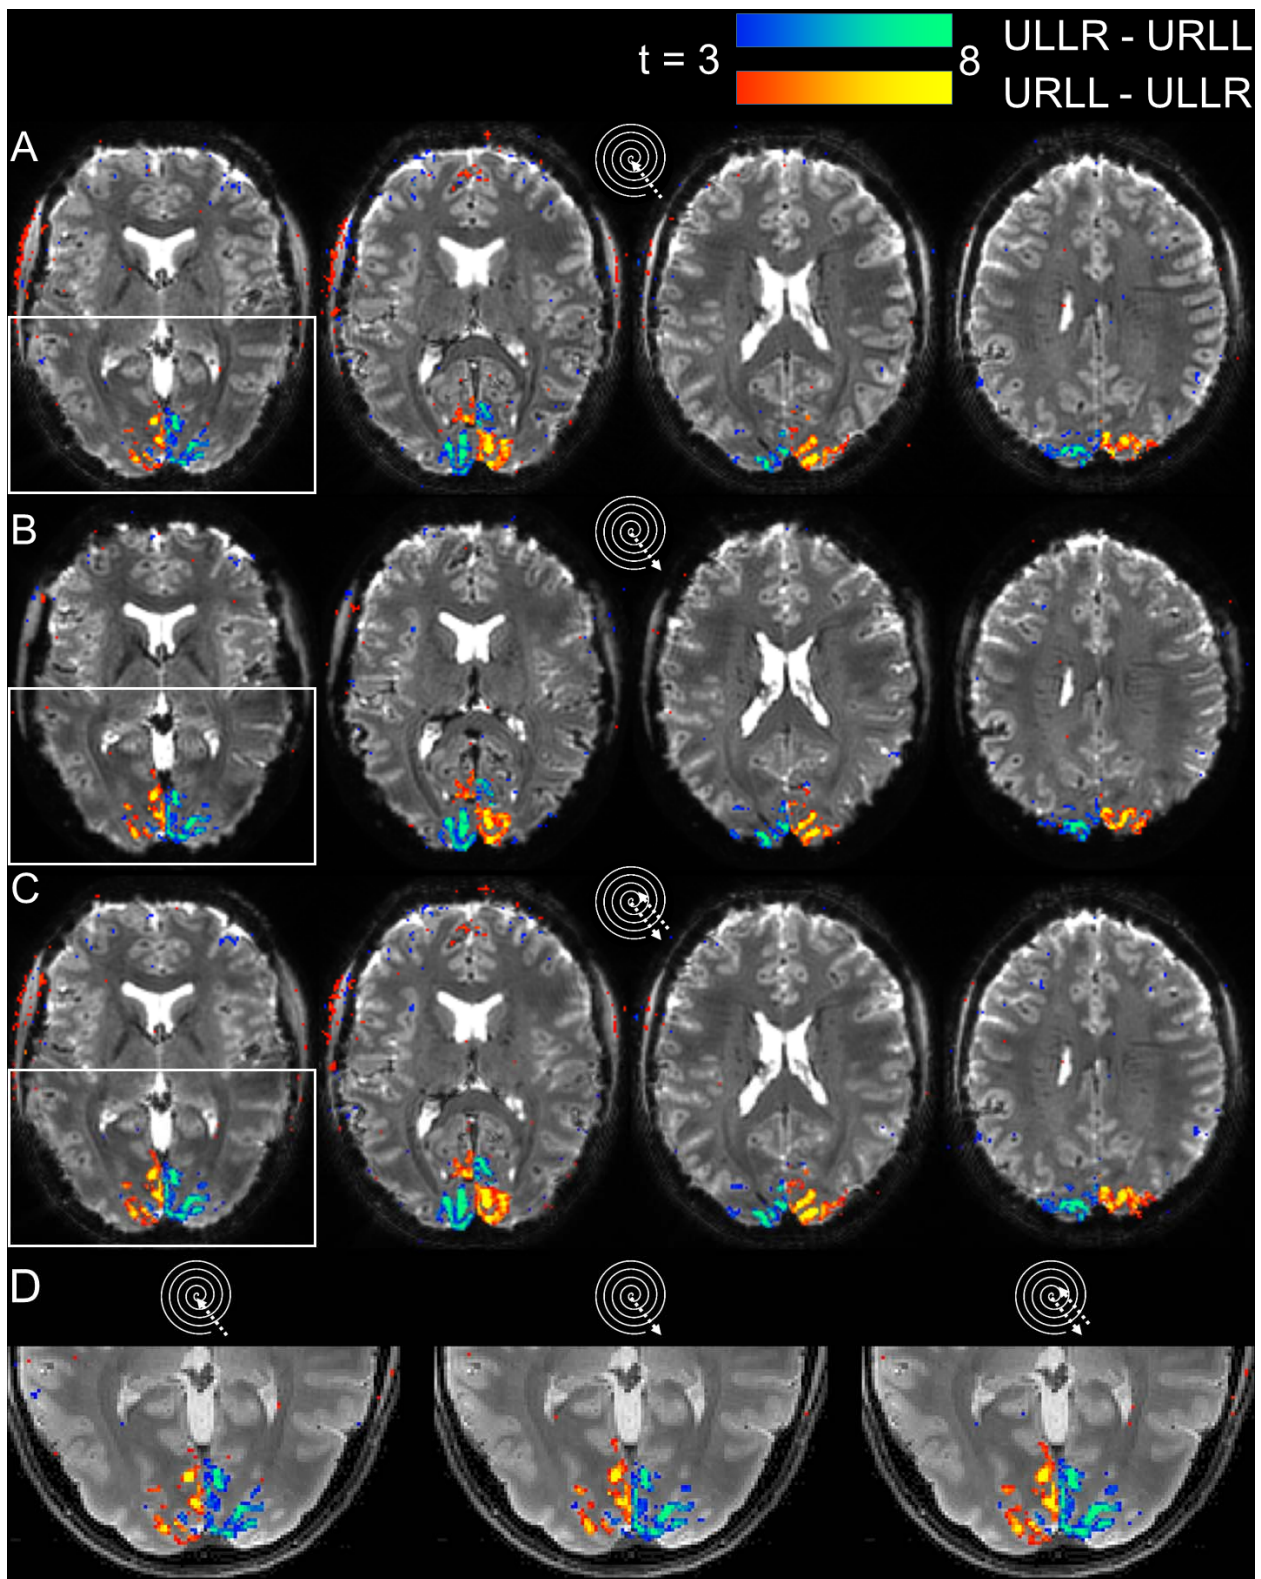

1025

## Advances in Spiral fMRI

1026 Visual Activation Maps of spiral in/out (1.5mm) fMRI run for a single subject (S2, as in  
1027 Fig. 6). (A-C) Displayed are the differential t-contrast maps ( $p < 0.001$  uncorrected) on  
1028 transverse slices of the respective mean spiral images (hot colormap: ULL-ULLR, cool  
1029 colormap: ULLR-ULL), based on: (A) Spiral Images reconstructed from in-part of the  
1030 trajectory. (B) Spiral images reconstructed from the out-part of the trajectory. (C) Signal-  
1031 weighted combination (eq. (6), (Glover and Thomason, 2004)) of images in (A) and (B).  
1032 (D) Zoomed view of activation maps in leftmost slice of (A)-(C), overlaid on anatomical  
1033 reference image (mean ME).

1034



## Advances in Spiral fMRI

### 1035 **Tables**

#### 1036 **Table 1**

1037 Quantification of temporal stability and functional sensitivity of all spiral fMRI sequences.  
1038 For the signal-to-fluctuation-noise ratio (SFNR, eq. (5)), the table contains mean +/- SD  
1039 in a gray matter ROI over the whole imaging volume. For the t-contrast SPMs, peak t-  
1040 value and number of significant voxels over both differential contrasts (+/- ULLR-URLL)  
1041 are reported ( $p < 0.05$  FWE-corrected for multiple comparisons at the cluster level with a  
1042 cluster-forming threshold of  $p < 0.001$ ). The last column shows relative increases to the  
1043 previous sequence, i.e., the one reported in the sub-table directly above. Since resolutions  
1044 differ between spiral-out (0.8 mm) and spiral in/out (1.5 mm), we compare activated  
1045 volume instead of voxel count.

1046

## Advances in Spiral fMRI

| <i>Measure</i>                    | <b>Subjects</b> |           |           |           |           |           |             |           | <b>Gain vs</b>         |                            |
|-----------------------------------|-----------------|-----------|-----------|-----------|-----------|-----------|-------------|-----------|------------------------|----------------------------|
|                                   | <i>S2</i>       | <i>S3</i> | <i>S4</i> | <i>S5</i> | <i>S6</i> | <i>S7</i> | <i>Mean</i> | <i>SD</i> | <i>previous spiral</i> | <i>high-res spiral out</i> |
| <b>high-resolution spiral out</b> |                 |           |           |           |           |           |             |           |                        |                            |
| SFNR_mean                         | 14.1            | 17.2      | 14.9      | 15.7      | 14.7      | 15.2      | 15.3        | 1.1       | -                      | -                          |
| SFNR_SD                           | 5.0             | 5.4       | 4.6       | 5.0       | 4.7       | 4.9       | 4.9         | 0.3       |                        |                            |
| SPM_T_max                         | 12.9            | 15.2      | 16.2      | 17.5      | 11.1      | 17.6      | 15.1        | 2.6       | -                      | -                          |
| SPM_T_nVoxels                     | 10957           | 6157      | 11673     | 12202     | 8682      | 12553     | 10371       | 2480      |                        |                            |
| SPM_T_volume (mm <sup>3</sup> )   | 6832            | 3839      | 7279      | 7609      | 5414      | 7828      | 6467        | 1547      | -                      | -                          |
| <b>in-part spiral in/out</b>      |                 |           |           |           |           |           |             |           |                        |                            |
| SFNR_mean                         | 22.7            | 28.6      | 23.5      | 26.6      | 22.9      | 23.9      | 24.7        | 2.4       | 61%                    | 61%                        |
| SFNR_SD                           | 7.3             | 8.2       | 7.6       | 7.8       | 7.3       | 8.2       | 7.7         | 0.4       |                        |                            |
| SPM_T_max                         | 16.6            | 19.5      | 23.5      | 15.1      | 15.3      | 15.9      | 17.7        | 3.3       | 17%                    | 17%                        |
| SPM_T_nVoxels                     | 10097           | 4863      | 10221     | 6470      | 8157      | 2816      | 7104        | 2953      |                        |                            |
| SPM_T_volume (mm <sup>3</sup> )   | 14363           | 6918      | 14540     | 9204      | 11604     | 4006      | 10106       | 4200      | 56%                    | 56%                        |
| <b>out-part spiral in/out</b>     |                 |           |           |           |           |           |             |           |                        |                            |
| SFNR_mean                         | 20.4            | 26.4      | 21.4      | 24.3      | 21.0      | 22.9      | 22.7        | 2.3       | -8%                    | 48%                        |
| SFNR_SD                           | 7.3             | 8.4       | 7.4       | 8.0       | 7.7       | 7.9       | 7.8         | 0.4       |                        |                            |
| SPM_T_max                         | 17.8            | 20.2      | 18.2      | 20.1      | 17.2      | 14.4      | 18.0        | 2.1       | 2%                     | 19%                        |
| SPM_T_nVoxels                     | 8976            | 6087      | 10661     | 7923      | 11606     | 3312      | 8094        | 3054      |                        |                            |
| SPM_T_volume (mm <sup>3</sup> )   | 12769           | 8659      | 15166     | 11271     | 16510     | 4711      | 11514       | 4344      | 14%                    | 78%                        |
| <b>combined spiral in/out</b>     |                 |           |           |           |           |           |             |           |                        |                            |
| SFNR_mean                         | 28.3            | 35.9      | 29.5      | 33.6      | 28.7      | 30.3      | 31.1        | 3.0       | 37%                    | 103%                       |
| SFNR_SD                           | 9.4             | 10.9      | 10.0      | 10.4      | 9.9       | 10.7      | 10.2        | 0.5       |                        |                            |
| SPM_T_max                         | 18.4            | 19.7      | 20.3      | 17.8      | 15.8      | 18.3      | 18.4        | 1.6       | 2%                     | 22%                        |
| SPM_T_nVoxels                     | 11971           | 6575      | 13254     | 9331      | 11665     | 6082      | 9813        | 2985      |                        |                            |
| SPM_T_volume (mm <sup>3</sup> )   | 17029           | 9353      | 18854     | 13274     | 16594     | 8652      | 13959       | 4247      | 21%                    | 116%                       |

1047

## Advances in Spiral fMRI

### 1048 **Supplementary Material**

#### 1049 **Figure SM 1**

1050 Figure collection of high-resolution (0.8 mm) spiral fMRI data. For every subject, 8 figures  
1051 are shown, each depicting all 36 slices of the acquisition (top left = most inferior slice,  
1052 bottom right = most superior slice). All underlay images are based on the functional time  
1053 series after realignment, and the overlaid t-map was computed from the preprocessed  
1054 data which included smoothing as well (FWHM 0.8 mm). Order of the figures (1) First  
1055 volume of spiral fMRI time series; (2) Time-series magnitude mean of spiral fMRI run; (3)  
1056 Bias-field corrected version of (2); (4) Signal-to-Noise Fluctuation Ratio (SFNR) image of  
1057 spiral fMRI run (display range 0-30); (5) Standard deviation (SD) image over time of the  
1058 same run (display range 0-0.05); (6) Coefficient of Variation (CoV) image of the same run,  
1059 inverse of (4) (display range 0-0.2); (7) Magnitude-mean spiral fMRI image, overlaid with  
1060 edges of anatomical reference (mean multi-echo spin warp); (8) Overlay of differential t-  
1061 contrast maps ( $p < 0.001$  uncorrected) on transverse slices of mean spiral image (hot  
1062 colormap: URLL-ULLR, cool colormap: ULLR-URLL, display range  $t=3.2-8$ ).

1063

## Advances in Spiral fMRI

### 1064 **Figure SM 2**

1065 Figure collection of spiral in/out fMRI data (1.5 mm resolution). For every subject, 24=3x8  
1066 figures are shown, i.e., 8 per set of spiral-in, spiral-out, and combined in/out images. Each  
1067 figure depicts all 36 slices of the acquisition (top left = most inferior slice, bottom right =  
1068 most superior slice). All underlay images are based on the functional time series after  
1069 realignment, and the overlaid t-map was computed from the preprocessed data which  
1070 included smoothing as well (FWHM 0.8 mm). Order of the figures: (1) First volume of  
1071 spiral fMRI time series; (2) Time-series magnitude mean of spiral fMRI run; (3) Bias-field  
1072 corrected version of (2); (4) Signal-to-Noise Fluctuation Ratio (SFNR) image of spiral  
1073 fMRI run (display range 0-30); (5) Standard deviation (SD) image over time of the same  
1074 run (display range 0-0.05); (6) Coefficient of Variation (CoV) image of the same run,  
1075 inverse of (4) (display range 0-0.2); (7) Magnitude-mean spiral fMRI image, overlaid with  
1076 edges of anatomical reference (mean multi-echo spin warp); (8) Overlay of differential t-  
1077 contrast maps ( $p < 0.001$  uncorrected) on transverse slices of mean spiral image (hot  
1078 colormap: URLL-ULLR, cool colormap: ULLR-URLL, display range  $t=3.2-8$ ).

1079

## Advances in Spiral fMRI

1080 **Figure SM 3**

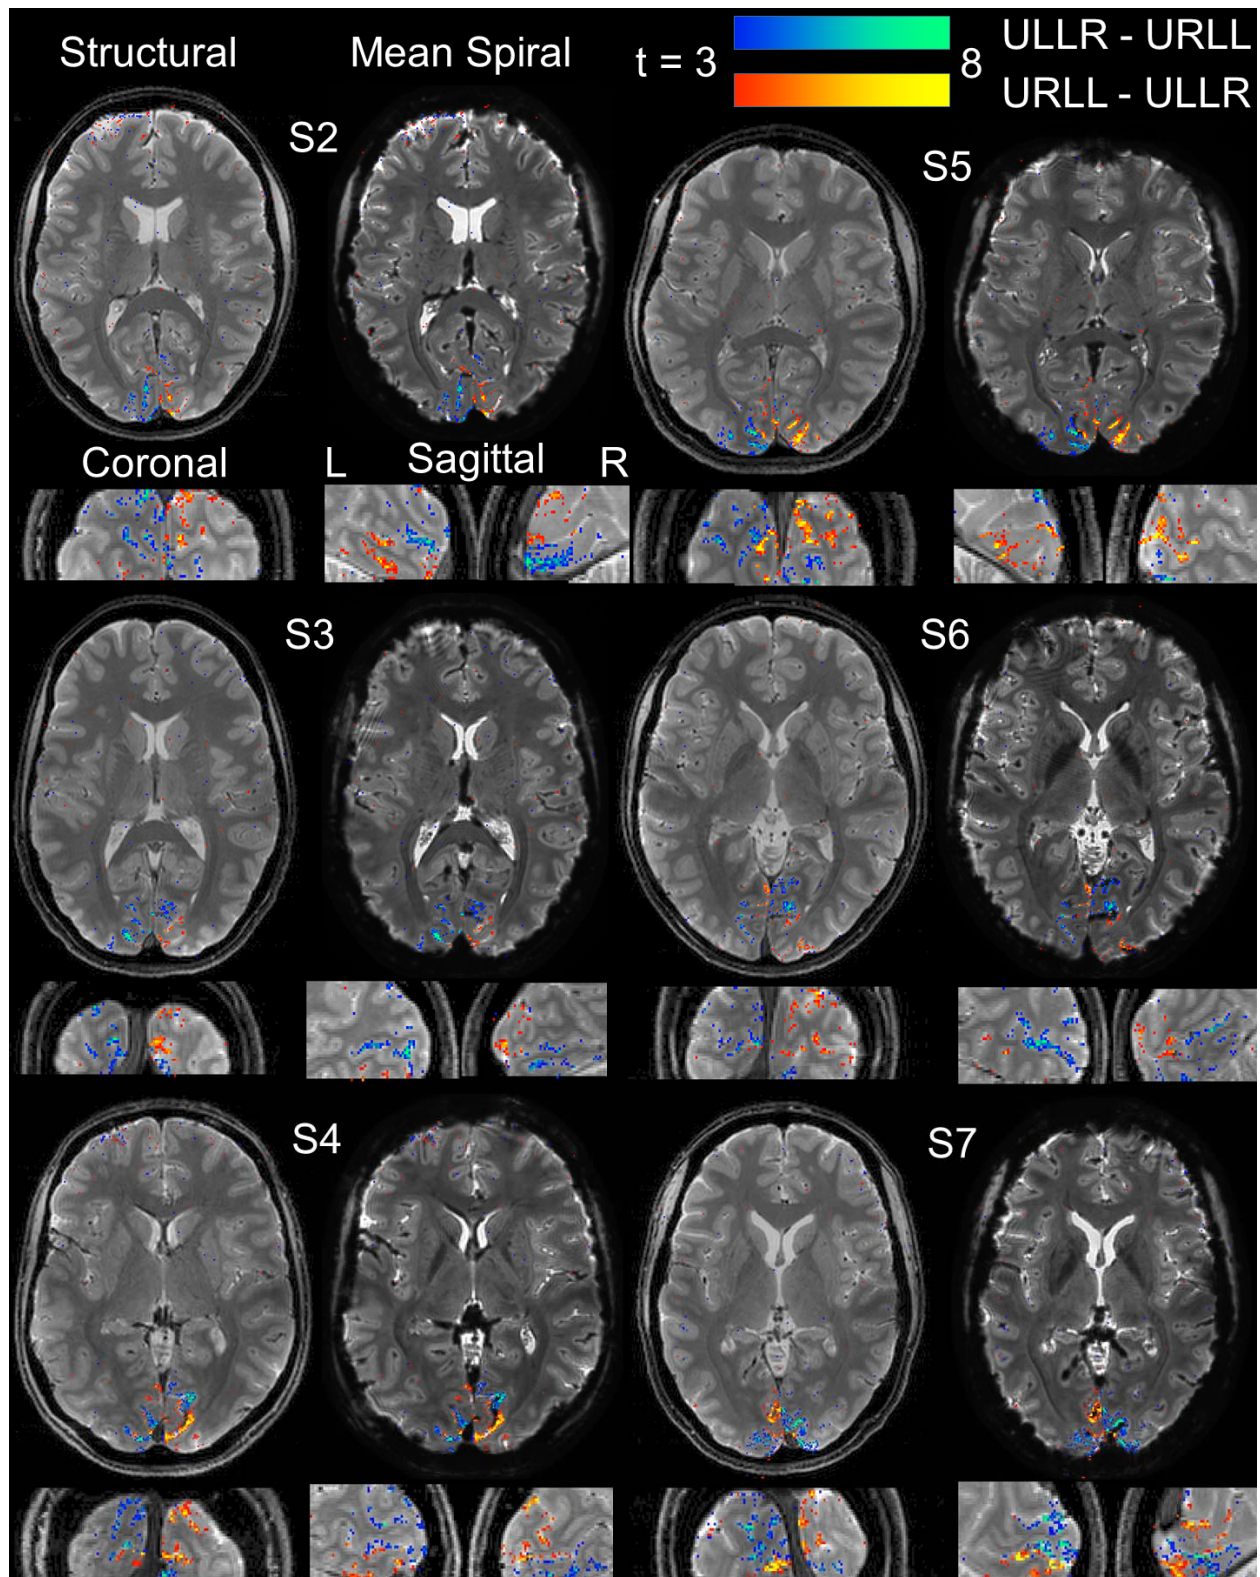

1081

## Advances in Spiral fMRI

1082 Mean spiral images and activation maps over subjects (S2-S7) for high-resolution spiral-  
1083 out fMRI, based on unsmoothed data (See Fig. 7 for same visualization using smoothed  
1084 data). For each subject, the following 4 sections are displayed, with the mean ME image  
1085 as anatomical underlay: transverse, coronal and sagittal slice (for left (L) and right (R)  
1086 hemisphere), each chosen for the maximum number of activated voxels (over both  
1087 differential statistical t-contrasts,  $p < 0.001$  uncorrected). To assess raw spiral data quality,  
1088 the corresponding mean functional image is displayed side-by-side to the anatomical  
1089 transverse slice as an alternative underlay.

1090

1091

1092

## Advances in Spiral fMRI

### 1093 **Figure SM 4**

1094 Impact of readout duration and spatial smoothing on activation maps in high-resolution  
1095 spiral-out fMRI data. The animated slideshow toggles between t-maps of the differential  
1096 contrast (+/- ULLR-URLL), overlaid on the structural image (mean ME) in a single subject  
1097 (S<sub>2</sub>): (1) T-map based on smoothed data (FWHM 0.8 mm), thresholded at  $t > 3.2$ ,  
1098 ( $p < 0.001$  uncorrected), as presented throughout the other figures, (2) T-map based on  
1099 unsmoothed data, same thresholding ( $t > 3.2$ ), and (3) T-map based on unsmoothed data,  
1100 with more liberal thresholding ( $t > 2.4$ ,  $p < 0.01$  uncorrected). (4-6) as (1-3), but with  
1101 spiral-out fMRI k-space data retrospectively cropped to 1 mm resolution before image  
1102 reconstruction.

1103 (1-3) illustrate that moderate spatial smoothing elevates overall CNR (higher t-values) and  
1104 increases the spatial extent of existing activation clusters in the unsmoothed data. The  
1105 activation clusters of the smoothed data resemble those in the unsmoothed data at lower  
1106 thresholds, but without the single-voxel false-positives. This suggests that the averaging  
1107 of thermal noise via smoothing delivers an implicit cluster size correction.

1108 (4-6) illustrate that cropping the spiral readout to 1 mm resolution yields similar  
1109 activation maps to using the full 0.8 mm readout, both before and after smoothing. This  
1110 indicates that the assessment of spatial specificity is SNR-limited for the short functional  
1111 runs (5.5 min) investigated here.

1112

## Advances in Spiral fMRI

### 1113 Table SM 5

1114 Comparison of acquisition efficiency in published 2D spiral fMRI studies. Nominal  
 1115 acquisition efficiency, computed as resolved voxels per unit time (i.e., matrix size per  
 1116 volume TR) is compared for several publications referenced in this manuscript. The  
 1117 combination of single-shot sequences with long readouts and parallel imaging, as utilized  
 1118 in this study, achieves the highest acquisition efficiency.

| Publication                                                           | resolution [mm] |     | FOV [mm] |    | matrix size |   | inter-leave<br>s | TR/<br>interlea<br>f [s] | volum<br>e TR [s] | acquisition<br>efficiency [1000 voxels/s] |
|-----------------------------------------------------------------------|-----------------|-----|----------|----|-------------|---|------------------|--------------------------|-------------------|-------------------------------------------|
|                                                                       | xy              | z   | xy       | z  | xy          | z |                  |                          |                   |                                           |
| (Glover and Lai, 1998)                                                | 2.4             | 5.0 | 0        | 22 | 90          | 6 | 1                | 1                        | 1.0               | 49                                        |
| (Weiger et al., 2002)                                                 | 3               | 5.0 | 0        | 24 | 80          | 4 | 1                | 2.5                      | 2.5               | 61                                        |
| (Ress et al., 2007)                                                   | 0.7             | 0.9 | 0        | 10 | 1           | 1 | 2                | 1                        | 2                 | 109                                       |
| (Preston et al., 2009; Wolosin et al., 2012; Zeithamova et al., 2016) | 0.6             | 9   | 0        | 7  | 0           | 8 | 3                | 0.7                      | 2                 | 102                                       |
| (Katyal et al., 2010)                                                 | 1.7             | 3.0 | 0        | 22 | 12          | 2 | 4                | 1.0                      | 4                 | 92                                        |
| (Chang and Glover, 2011)                                              | 1.2             | 1.0 | 0        | 17 | 2           | 8 | 3                | 1.0                      | 3                 | 54                                        |
| (Jung et al., 2013)                                                   | 1.7             | 4.0 | 0        | 22 | 8           | 4 | 1                | 2.5                      | 2.5               | 157                                       |
| (Kim and Ress, 2017)                                                  | 1               | 2.0 | 6        | 30 | 6           | 5 | 4                | 1.0                      | 4                 | 246                                       |
| (Savjani et al., 2018)                                                | 1.5             | 1.0 | 0        | 24 | 16          | 2 | 2                | 1.5                      | 3                 | 205                                       |
| (Singh et al., 2018)                                                  | 0.7             | 9.0 | 90       | 7  | 8           | 8 | 3                | 1.0                      | 3                 | 44                                        |
| <i>This study</i>                                                     | 0.8             | 1.0 | 0        | 17 | 2           | 8 | 3                | 0.8                      | 2.4               | 67                                        |
|                                                                       | 1.2             | 1.0 | 2        | 14 | 0           | 2 | 3                | 1.0                      | 3                 | 102                                       |
|                                                                       | 0.8             | 0.9 | 0        | 23 | 28          | 3 | 1                | 3.3                      | 3.3               | 902                                       |

1119



## Advances in Spiral fMRI

1120

## Advances in Spiral fMRI

### 1121 Figure SM 6

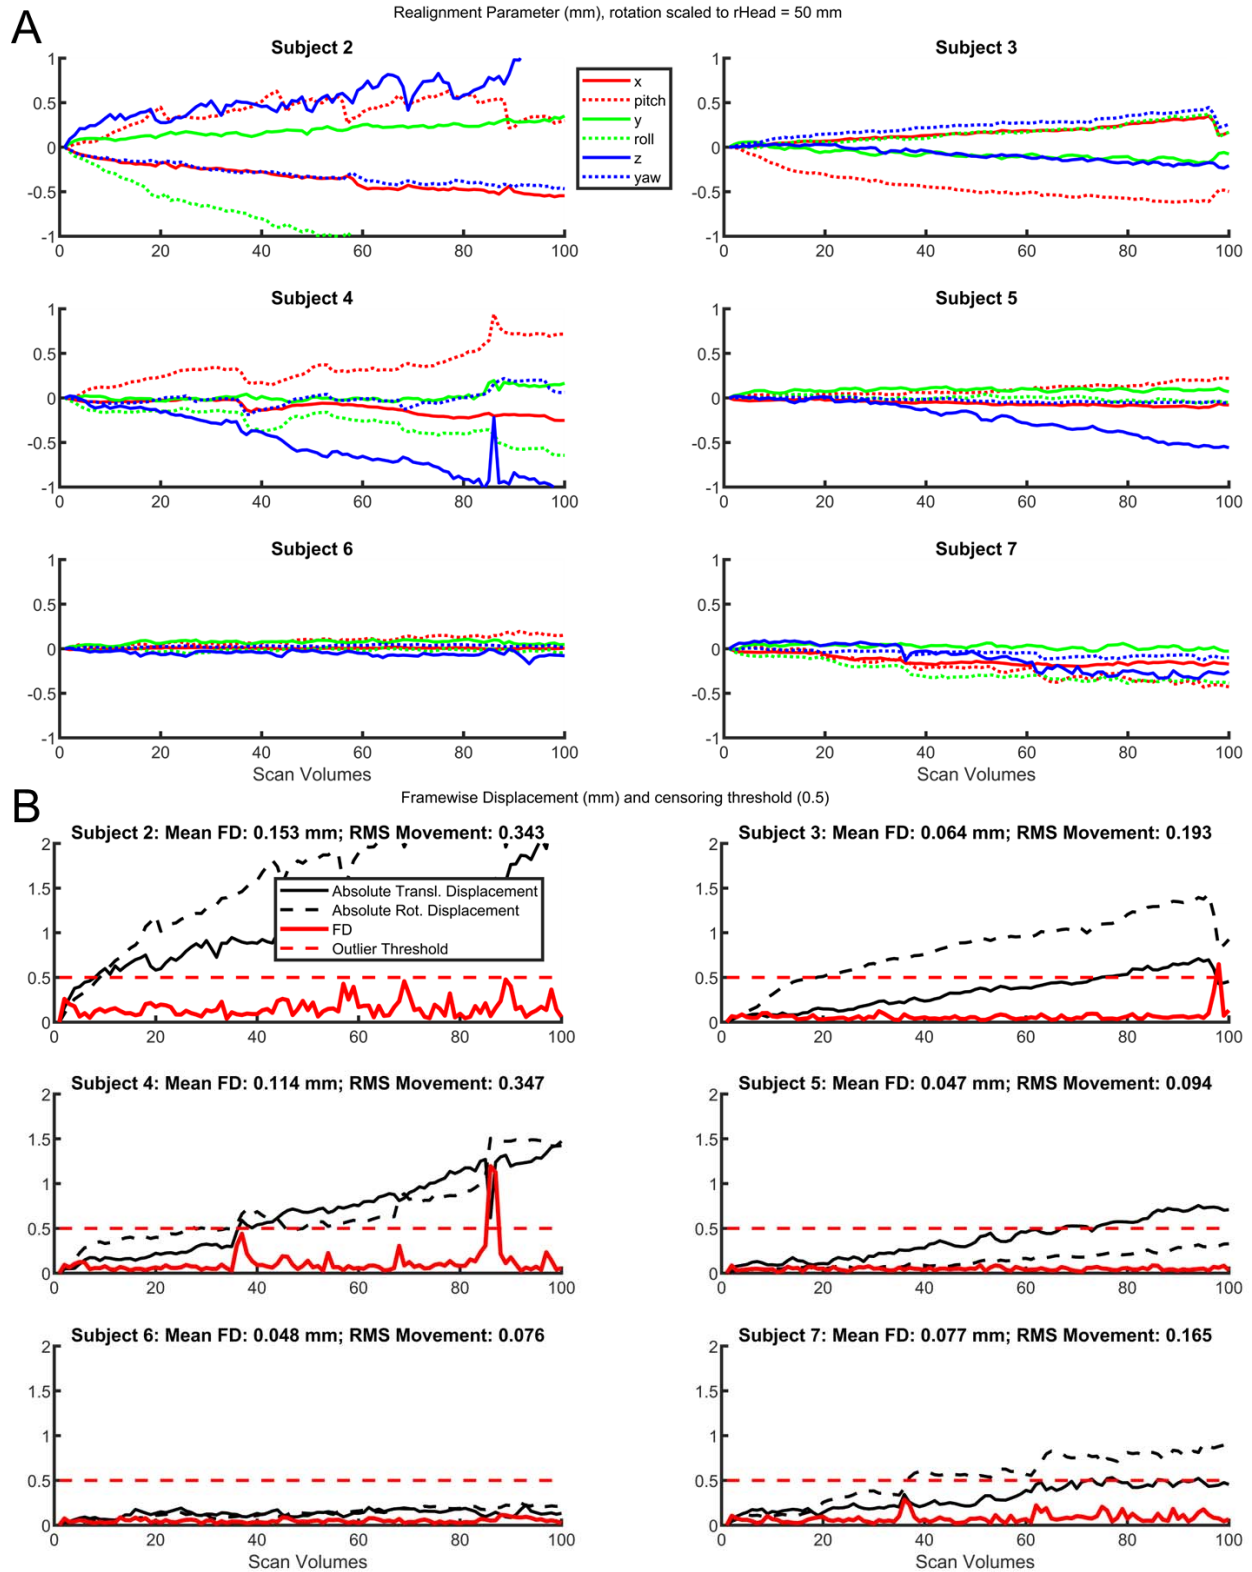

1122

## Advances in Spiral fMRI

1123 Motion parameters for all subjects during high-resolution (0.8 mm) spiral-out fMRI runs.  
1124 Displayed are (A) the 3 translational and 3 rotational realignment parameter traces over  
1125 volumes obtained by rigid-body registration, as well as (B) corresponding framewise  
1126 displacement (FD) curves (Power et al., 2012). Mean FD was well below 0.2 mm for every  
1127 subject (max. 0.15 mm, mean FD and standard deviation over subjects  $0.09 \pm 0.04$  mm),  
1128 which is often considered a very rigorous criterion for censoring of motion-contaminated  
1129 data (Power et al., 2015). Individual FDs of larger than 0.5 mm occurred in only 3 volumes  
1130 of 2 subjects (red dashed line threshold).

1131

## 1132 **References**

- 1133 Addy, N.O., Wu, H.H., Nishimura, D.G., 2012. Simple method for MR gradient system  
1134 characterization and k-space trajectory estimation. *Magn. Reson. Med.* 68, 120–129.  
1135 <https://doi.org/10.1002/mrm.23217>
- 1136 Ahn, C.B., Kim, J.H., Cho, Z.H., 1986. High-Speed Spiral-Scan Echo Planar NMR Imaging-  
1137 I. *IEEE Trans. Med. Imaging* 5, 2–7. <https://doi.org/10.1109/TMI.1986.4307732>
- 1138 Amunts, K., Malikovic, A., Mohlberg, H., Schormann, T., Zilles, K., 2000. Brodmann's  
1139 Areas 17 and 18 Brought into Stereotaxic Space—Where and How Variable?  
1140 *NeuroImage* 11, 66–84. <https://doi.org/10.1006/nimg.1999.0516>
- 1141 Ashburner, J., Friston, K.J., 2005. Unified segmentation. *NeuroImage* 26, 839–851.  
1142 <https://doi.org/10.1016/j.neuroimage.2005.02.018>
- 1143 Balla, D.Z., Sanchez-Panchuelo, R.M., Wharton, S.J., Hagberg, G.E., Scheffler, K., Francis,  
1144 S.T., Bowtell, R., 2014. Functional quantitative susceptibility mapping (fQSM).  
1145 *NeuroImage* 100, 112–124. <https://doi.org/10.1016/j.neuroimage.2014.06.011>
- 1146 Barmet, C., Tsao, J., Pruessmann, K.P., 2005. Sensitivity encoding and B<sub>0</sub> inhomogeneity-  
1147 A simultaneous reconstruction approach, in: *Proceedings of the 13th Annual*  
1148 *Meeting of ISMRM.* p. 682.
- 1149 Barmet, C., Zanche, N.D., Pruessmann, K.P., 2008. Spatiotemporal magnetic field  
1150 monitoring for MR. *Magn. Reson. Med.* 60, 187–197.  
1151 <https://doi.org/10.1002/mrm.21603>
- 1152 Barth, M., Metzler, A., Klarhöfer, M., Röhl, S., Moser, E., Leibfritz, D., 1999. Functional  
1153 MRI of the human motor cortex using single-shot, multiple gradient-echo spiral  
1154 imaging. *Magn. Reson. Imaging* 17, 1239–1243. [https://doi.org/10.1016/S0730-725X\(99\)00087-9](https://doi.org/10.1016/S0730-725X(99)00087-9)
- 1156 Beatty, P.J., Nishimura, D.G., Pauly, J.M., 2005. Rapid gridding reconstruction with a  
1157 minimal oversampling ratio. *IEEE Trans. Med. Imaging* 24, 799–808.  
1158 <https://doi.org/10.1109/TMI.2005.848376>

## Advances in Spiral fMRI

- 1159 Bernstein, M.A., King, K.F., Zhou, X.J. (Eds.), 2004. Chapter 17 - Advanced Pulse Sequence  
1160 Techniques, in: Handbook of MRI Pulse Sequences. Academic Press, Burlington,  
1161 pp. 802-954.
- 1162 Bezanson, J., Edelman, A., Karpinski, S., Shah, V.B., 2017. Julia: A Fresh Approach to  
1163 Numerical Computing. *SIAM Rev.* 59, 65-98. <https://doi.org/10.1137/141000671>
- 1164 Bhavsar, P.S., Zwart, N.R., Pipe, J.G., 2014. Fast, variable system delay correction for spiral  
1165 MRI. *Magn. Reson. Med.* 71, 773-782. <https://doi.org/10.1002/mrm.24730>
- 1166 Bianciardi, M., Gelderen, P. van, Duyn, J.H., 2014. Investigation of BOLD fMRI resonance  
1167 frequency shifts and quantitative susceptibility changes at 7 T. *Hum. Brain Mapp.*  
1168 35, 2191-2205. <https://doi.org/10.1002/hbm.22320>
- 1169 Blazejewski, A.I., Fischl, B., Wald, L.L., Polimeni, J.R., 2019. Intracortical smoothing of  
1170 small-voxel fMRI data can provide increased detection power without spatial  
1171 resolution losses compared to conventional large-voxel fMRI data. *NeuroImage*  
1172 189, 601-614. <https://doi.org/10.1016/j.neuroimage.2019.01.054>
- 1173 Block, K.T., Frahm, J., 2005. Spiral imaging: A critical appraisal. *J. Magn. Reson. Imaging*  
1174 21, 657-668. <https://doi.org/10.1002/jmri.20320>
- 1175 Bollmann, S., Kasper, L., Pruessmann, K., Barth, M., Stephan, K.E., 2018. Interactive and  
1176 flexible quality control in fMRI sequence evaluation: the uniQC toolbox, in:  
1177 Proceedings of the 26th Annual Meeting of ISMRM. Presented at the ISMRM,  
1178 Paris, France, p. 2842.
- 1179 Bollmann, S., Kasper, L., Vannesjo, S.J., Diaconescu, A.O., Dietrich, B.E., Gross, S.,  
1180 Stephan, K.E., Pruessmann, K.P., 2017. Analysis and correction of field fluctuations  
1181 in fMRI data using field monitoring. *NeuroImage, Cleaning up the fMRI time*  
1182 *series: Mitigating noise with advanced acquisition and correction strategies* 154,  
1183 92-105. <https://doi.org/10.1016/j.neuroimage.2017.01.014>
- 1184 Börnert, P., Aldefeld, B., Eggers, H., 2000. Reversed spiral MR imaging. *Magn. Reson.*  
1185 *Med.* 44, 479-484. [https://doi.org/10.1002/1522-2594\(200009\)44:3<479::AID-](https://doi.org/10.1002/1522-2594(200009)44:3<479::AID-MRM20>3.0.CO;2-2)  
1186 [MRM20>3.0.CO;2-2](https://doi.org/10.1002/1522-2594(200009)44:3<479::AID-MRM20>3.0.CO;2-2)

## Advances in Spiral fMRI

- 1187 Börnert, P., Schomberg, H., Aldefeld, B., Groen, J., 1999. Improvements in spiral MR  
1188 imaging. *Magn. Reson. Mater. Phys. Biol. Med.* 9, 29–41.  
1189 <https://doi.org/10.1007/BF02634590>
- 1190 Breuer, F.A., Blaimer, M., Mueller, M.F., Seiberlich, N., Heidemann, R.M., Griswold, M.A.,  
1191 Jakob, P.M., 2006. Controlled aliasing in volumetric parallel imaging (2D  
1192 CAIPIRINHA). *Magn. Reson. Med.* 55, 549–556. <https://doi.org/10.1002/mrm.20787>
- 1193 Calhoun, V.D., Adal&inodot;, T., Pearlson, G.D., Zijl, P.C.M. van, Pekar, J.J., 2002.  
1194 Independent component analysis of fMRI data in the complex domain. *Magn.*  
1195 *Reson. Med.* 48, 180–192. <https://doi.org/10.1002/mrm.10202>
- 1196 Campbell-Washburn, A.E., Xue, H., Lederman, R.J., Faranesh, A.Z., Hansen, M.S., 2016.  
1197 Real-time distortion correction of spiral and echo planar images using the gradient  
1198 system impulse response function. *Magn. Reson. Med.* 75, 2278–2285.  
1199 <https://doi.org/10.1002/mrm.25788>
- 1200 Cavusoglu, M., Kasper, L., Pruessmann, K.P., 2017. Single-Shot Spiral Arterial Spin  
1201 Labeling MRI Enabled by Concurrent Field Monitoring, in: Proceedings of the 25th  
1202 Annual Meeting of ISMRM. Presented at the ISMRM, Honolulu, Hawaii, USA, p.  
1203 1042.
- 1204 Chang, Y.V., Vidorreta, M., Wang, Z., Detre, J.A., 2017. 3D-accelerated, stack-of-spirals  
1205 acquisitions and reconstruction of arterial spin labeling MRI. *Magn. Reson. Med.*  
1206 78, 1405–1419. <https://doi.org/10.1002/mrm.26549>
- 1207 Cheng, K., Waggoner, R.A., Tanaka, K., 2001. Human Ocular Dominance Columns as  
1208 Revealed by High-Field Functional Magnetic Resonance Imaging. *Neuron* 32, 359–  
1209 374. [https://doi.org/10.1016/S0896-6273\(01\)00477-9](https://doi.org/10.1016/S0896-6273(01)00477-9)
- 1210 Cohen, M.S., Schmitt, F., 2012. Echo planar imaging before and after fMRI: A personal  
1211 history. *NeuroImage*, 20 YEARS OF fMRI 62, 652–659.  
1212 <https://doi.org/10.1016/j.neuroimage.2012.01.038>

## Advances in Spiral fMRI

- 1213 D'Ardenne, K., McClure, S.M., Nystrom, L.E., Cohen, J.D., 2008. BOLD Responses  
1214 Reflecting Dopaminergic Signals in the Human Ventral Tegmental Area. *Science*  
1215 319, 1264—1267. <http://dx.doi.org/10.1126/science.1150605>
- 1216 de Hollander, G., Keuken, M.C., van der Zwaag, W., Forstmann, B.U., Trampel, R., 2017.  
1217 Comparing functional MRI protocols for small, iron-rich basal ganglia nuclei such  
1218 as the subthalamic nucleus at 7 T and 3 T. *Hum. Brain Mapp.* 38, 3226–3248.  
1219 <https://doi.org/10.1002/hbm.23586>
- 1220 De Martino, F., Moerel, M., van de Moortele, P.-F., Ugurbil, K., Goebel, R., Yacoub, E.,  
1221 Formisano, E., 2013. Spatial organization of frequency preference and selectivity in  
1222 the human inferior colliculus. *Nat. Commun.* 4, 1386.  
1223 <https://doi.org/10.1038/ncomms2379>
- 1224 Deng, W., Zahneisen, B., Stenger, V.A., 2016. Rotated stack-of-spirals partial acquisition  
1225 for rapid volumetric parallel MRI. *Magn. Reson. Med.* 76, 127–135.  
1226 <https://doi.org/10.1002/mrm.25863>
- 1227 Detre, J.A., Leigh, J.S., Williams, D.S., Koretsky, A.P., 1992. Perfusion imaging. *Magn.*  
1228 *Reson. Med.* 23, 37–45. <https://doi.org/10.1002/mrm.1910230106>
- 1229 Detre, J.A., Rao, H., Wang, D.J.J., Chen, Y.F., Wang, Z., 2012. Applications of arterial spin  
1230 labeled MRI in the brain. *J. Magn. Reson. Imaging* 35, 1026–1037.  
1231 <https://doi.org/10.1002/jmri.23581>
- 1232 Dietrich, B.E., Brunner, D.O., Wilm, B.J., Barmet, C., Gross, S., Kasper, L., Haerberlin, M.,  
1233 Schmid, T., Vannesjo, S.J., Pruessmann, K.P., 2016a. A field camera for MR  
1234 sequence monitoring and system analysis: MR Sequence Monitoring and System  
1235 Analysis Camera. *Magn. Reson. Med.* 75, 1831–1840.  
1236 <https://doi.org/10.1002/mrm.25770>
- 1237 Dietrich, B.E., Reber, J., Brunner, D.O., Wilm, B.J., Pruessmann, K.P., 2016b. Analysis and  
1238 Prediction of Gradient Response Functions under Thermal Load, in: Proceedings  
1239 of the 24th Annual Meeting of ISMRM. Presented at the ISMRM, Singapore,  
1240 Singapore, p. 3551.

## Advances in Spiral fMRI

- 1241 Duerst, Y., Wilm, B.J., Wyss, M., Dietrich, B.E., Gross, S., Schmid, T., Brunner, D.O.,  
1242 Pruessmann, K.P., 2016. Utility of real-time field control in T<sub>2</sub>\*-Weighted head  
1243 MRI at 7T. *Magn. Reson. Med.* 76, 430–439. <https://doi.org/10.1002/mrm.25838>
- 1244 Duyn, J.H., Yang, Y., Frank, J.A., van der Veen, J.W., 1998. Simple Correction Method  
1245 fork-Space Trajectory Deviations in MRI. *J. Magn. Reson.* 132, 150–153.  
1246 <https://doi.org/10.1006/jmre.1998.1396>
- 1247 Eickhoff, S.B., Heim, S., Zilles, K., Amunts, K., 2006. Testing anatomically specified  
1248 hypotheses in functional imaging using cytoarchitectonic maps. *NeuroImage* 32,  
1249 570–582. <https://doi.org/10.1016/j.neuroimage.2006.04.204>
- 1250 Eickhoff, S.B., Paus, T., Caspers, S., Grosbras, M.-H., Evans, A.C., Zilles, K., Amunts, K.,  
1251 2007. Assignment of functional activations to probabilistic cytoarchitectonic areas  
1252 revisited. *NeuroImage* 36, 511–521. <https://doi.org/10.1016/j.neuroimage.2007.03.060>
- 1253 Eickhoff, S.B., Stephan, K.E., Mohlberg, H., Grefkes, C., Fink, G.R., Amunts, K., Zilles, K.,  
1254 2005. A new SPM toolbox for combining probabilistic cytoarchitectonic maps and  
1255 functional imaging data. *NeuroImage* 25, 1325–1335.  
1256 <https://doi.org/10.1016/j.neuroimage.2004.12.034>
- 1257 Engel, M., Kasper, L., Barmet, C., Schmid, T., Vionnet, L., Wilm, B., Pruessmann, K.P.,  
1258 2018. Single-shot spiral imaging at 7 T. *Magn. Reson. Med.* 80, 1836–1846.  
1259 <https://doi.org/10.1002/mrm.27176>
- 1260 Engel, M., Kasper, L., Wilm, B., Dietrich, B., Vionnet, L., Hennel, F., Reber, J.,  
1261 Pruessmann, K.P., 2021. T-Hex: Tilted hexagonal grids for rapid 3D imaging. *Magn.*  
1262 *Reson. Med.* 85, 2507–2523. <https://doi.org/10.1002/mrm.28600>
- 1263 Engel, S.A., Glover, G.H., Wandell, B.A., 1997. Retinotopic organization in human visual  
1264 cortex and the spatial precision of functional MRI. *Cereb. Cortex* 7, 181–192.  
1265 <https://doi.org/10.1093/cercor/7.2.181>
- 1266 Feinberg, D.A., Vu, A.T., Beckett, A., 2018. Pushing the limits of ultra-high resolution  
1267 human brain imaging with SMS-EPI demonstrated for columnar level fMRI.



## Advances in Spiral fMRI

- 1268 NeuroImage, Pushing the spatio-temporal limits of MRI and fMRI 164, 155–163.  
1269 <https://doi.org/10.1016/j.neuroimage.2017.02.020>
- 1270 Fessler, J.A., 2010. Model-Based Image Reconstruction for MRI. IEEE Signal Process. Mag.  
1271 27, 81–89. <https://doi.org/10.1109/MSP.2010.936726>
- 1272 Foo, T.K.F., Laskaris, E., Vermilyea, M., Xu, M., Thompson, P., Conte, G., Epps, C.V.,  
1273 Immer, C., Lee, S.-K., Tan, E.T., Graziani, D., Mathieu, J.-B., Hardy, C.J., Schenck,  
1274 J.F., Fiveland, E., Stautner, W., Ricci, J., Piel, J., Park, K., Hua, Y., Bai, Y., Kagan, A.,  
1275 Stanley, D., Weavers, P.T., Gray, E., Shu, Y., Frick, M.A., Campeau, N.G., Trzasko,  
1276 J., Huston, J., Bernstein, M.A., 2018. Lightweight, compact, and high-performance  
1277 3T MR system for imaging the brain and extremities. Magn. Reson. Med. 80, 2232–  
1278 2245. <https://doi.org/10.1002/mrm.27175>
- 1279 Fracasso, A., Petridou, N., Dumoulin, S.O., 2016. Systematic variation of population  
1280 receptive field properties across cortical depth in human visual cortex.  
1281 NeuroImage 139, 427–438. <https://doi.org/10.1016/j.neuroimage.2016.06.048>
- 1282 Frässle, S., Aponte, E.A., Bollmann, S., Brodersen, K.H., Do, C.T., Harrison, O.K.,  
1283 Harrison, S.J., Heinzle, J., Iglesias, S., Kasper, L., Lomakina, E.I., Mathys, C.,  
1284 Müller-Schrader, M., Pereira, I., Petzschner, F.H., Raman, S., Schöbi, D., Toussaint,  
1285 B., Weber, L.A., Yao, Y., Stephan, K.E., 2021. TAPAS: An Open-Source Software  
1286 Package for Translational Neuromodeling and Computational Psychiatry. Front.  
1287 Psychiatry 12. <https://doi.org/10.3389/fpsy.2021.680811>
- 1288 Friston, K.J., 2007. Chapter 2 - Statistical parametric mapping, in: Friston, K.J., Ashburner,  
1289 J., Kiebel, S., Nichols, T., Penny, W. (Eds.), Statistical Parametric Mapping.  
1290 Academic Press, London, pp. 10–31.
- 1291 Friston, K.J., Williams, S., Howard, R., Frackowiak, R.S.J., Turner, R., 1996. Movement-  
1292 Related effects in fMRI time-series. Magn. Reson. Med. 35, 346–355.  
1293 <https://doi.org/10.1002/mrm.1910350312>
- 1294 Glover, G.H., 2012. Spiral imaging in fMRI. NeuroImage, 20 Years of fMRI 62, 706–712.  
1295 <https://doi.org/10.1016/j.neuroimage.2011.10.039>

## Advances in Spiral fMRI

- 1296 Glover, G.H., 1999. Simple analytic spiral K-space algorithm. *Magn. Reson. Med.* 42, 412–  
1297 415. [https://doi.org/10.1002/\(SICI\)1522-2594\(199908\)42:2<412::AID-](https://doi.org/10.1002/(SICI)1522-2594(199908)42:2<412::AID-MRM25>3.0.CO;2-U)  
1298 [MRM25>3.0.CO;2-U](https://doi.org/10.1002/(SICI)1522-2594(199908)42:2<412::AID-MRM25>3.0.CO;2-U)
- 1299 Glover, G.H., Law, C.S., 2001. Spiral-in/out BOLD fMRI for increased SNR and reduced  
1300 susceptibility artifacts. *Magn. Reson. Med.* 46, 515–522.  
1301 <https://doi.org/10.1002/mrm.1222>
- 1302 Glover, G.H., Li, T.-Q., Ress, D., 2000. Image-based method for retrospective correction of  
1303 physiological motion effects in fMRI: RETROICOR. *Magn. Reson. Med.* 44, 162–167.  
1304 [https://doi.org/10.1002/1522-2594\(200007\)44:1<162::AID-MRM23>3.0.CO;2-E](https://doi.org/10.1002/1522-2594(200007)44:1<162::AID-MRM23>3.0.CO;2-E)
- 1305 Glover, G.H., Thomason, M.E., 2004. Improved combination of spiral-in/out images for  
1306 BOLD fMRI. *Magn. Reson. Med.* 51, 863–868. <https://doi.org/10.1002/mrm.20016>
- 1307 Gorgolewski, K.J., Varoquaux, G., Rivera, G., Schwarz, Y., Ghosh, S.S., Maumet, C., Sochat,  
1308 V.V., Nichols, T.E., Poldrack, R.A., Poline, J.-B., Yarkoni, T., Margulies, D.S., 2015.  
1309 NeuroVault.org: a web-based repository for collecting and sharing unthresholded  
1310 statistical maps of the human brain. *Front. Neuroinformatics* 9.  
1311 <https://doi.org/10.3389/fninf.2015.00008>
- 1312 Graedel, N.N., Hurley, S.A., Clare, S., Miller, K.L., Pruessmann, K.P., Vannesjo, S.J., 2017.  
1313 Comparison of gradient impulse response functions measured with a dynamic field  
1314 camera and a phantom-based technique. Presented at the 34th ESMRMB Congress,  
1315 Barcelona/ES, p. 378.
- 1316 Griswold, M.A., Jakob, P.M., Heidemann, R.M., Nittka, M., Jellus, V., Wang, J., Kiefer, B.,  
1317 Haase, A., 2002. Generalized autocalibrating partially parallel acquisitions  
1318 (GRAPPA). *Magn. Reson. Med.* 47, 1202–1210. <https://doi.org/10.1002/mrm.10171>
- 1319 Harvey, A.K., Pattinson, K.T.S., Brooks, J.C.W., Mayhew, S.D., Jenkinson, M., Wise, R.G.,  
1320 2008. Brainstem functional magnetic resonance imaging: Disentangling signal  
1321 from physiological noise. *J. Magn. Reson. Imaging* 28, 1337–1344.  
1322 <https://doi.org/10.1002/jmri.21623>

## Advances in Spiral fMRI

- 1323 Heidemann, R.M., Griswold, M.A., Seiberlich, N., Krüger, G., Kannengiesser, S.A.R.,  
1324 Kiefer, B., Wiggins, G., Wald, L.L., Jakob, P.M., 2006. Direct parallel image  
1325 reconstructions for spiral trajectories using GRAPPA. *Magn. Reson. Med.* 56, 317–  
1326 326. <https://doi.org/10.1002/mrm.20951>
- 1327 Hernando, D., Haldar, J.P., Sutton, B.P., Ma, J., Kellman, P., Liang, Z.-P., 2008. Joint  
1328 estimation of water/fat images and field inhomogeneity map. *Magn. Reson. Med.*  
1329 59, 571–580. <https://doi.org/10.1002/mrm.21522>
- 1330 Huber, L., Handwerker, D.A., Jangraw, D.C., Chen, G., Hall, A., Stüber, C., Gonzalez-  
1331 Castillo, J., Ivanov, D., Marrett, S., Guidi, M., Goense, J., Poser, B.A., Bandettini,  
1332 P.A., 2017a. High-Resolution CBV-fMRI Allows Mapping of Laminar Activity and  
1333 Connectivity of Cortical Input and Output in Human M1. *Neuron* 96, 1253-1263.e7.  
1334 <https://doi.org/10.1016/j.neuron.2017.11.005>
- 1335 Huber, L., Ivanov, D., Handwerker, D.A., Marrett, S., Guidi, M., Uludağ, K., Bandettini,  
1336 P.A., Poser, B.A., 2018. Techniques for blood volume fMRI with VASO: From low-  
1337 resolution mapping towards sub-millimeter layer-dependent applications.  
1338 *NeuroImage* 164, 131–143. <https://doi.org/10.1016/j.neuroimage.2016.11.039>
- 1339 Huber, L., Uludağ, K., Möller, H.E., 2017b. Non-BOLD contrast for laminar fMRI in  
1340 humans: CBF, CBV, and CMRO<sub>2</sub>. *NeuroImage*.  
1341 <https://doi.org/10.1016/j.neuroimage.2017.07.041>
- 1342 Jackson, J.I., Meyer, C.H., Nishimura, D.G., Macovski, A., 1991. Selection of a convolution  
1343 function for Fourier inversion using gridding. *IEEE Trans. Med. Imaging* 10,  
1344 473–478. <http://dx.doi.org/10.1109/42.97598>
- 1345 Jung, Y., Samsonov, A.A., Liu, T.T., Buracas, G.T., 2013. High efficiency multishot  
1346 interleaved spiral-in/out: Acquisition for high-resolution BOLD fMRI. *Magn.*  
1347 *Reson. Med.* 70, 420–428. <https://doi.org/10.1002/mrm.24476>
- 1348 Kaldoudi, E., Williams, S.C.R., Barker, G.J., Tofts, P.S., 1993. A chemical shift selective  
1349 inversion recovery sequence for fat-suppressed MRI: Theory and experimental

## Advances in Spiral fMRI

- 1350 validation. *Magn. Reson. Imaging* 11, 341–355. <https://doi.org/10.1016/0730->  
1351 [725X\(93\)90067-N](https://doi.org/10.1016/0730-725X(93)90067-N)
- 1352 Kashyap, S., Ivanov, D., Havlicek, M., Sengupta, S., Poser, B.A., Uludağ, K., 2018. Resolving  
1353 laminar activation in human V1 using ultra-high spatial resolution fMRI at 7T. *Sci.*  
1354 *Rep.* 8, 1–11. <https://doi.org/10.1038/s41598-018-35333-3>
- 1355 Kasper, L., Bollmann, S., Diaconescu, A.O., Hutton, C., Heinzle, J., Iglesias, S., Hauser,  
1356 T.U., Sebold, M., Manjaly, Z.-M., Pruessmann, K.P., Stephan, K.E., 2017. The  
1357 PhysIO Toolbox for Modeling Physiological Noise in fMRI Data. *J. Neurosci.*  
1358 *Methods* 276, 56–72. <https://doi.org/10.1016/j.jneumeth.2016.10.019>
- 1359 Kasper, L., Bollmann, S., Vannesjo, S.J., Gross, S., Haeberlin, M., Dietrich, B.E.,  
1360 Pruessmann, K.P., 2015. Monitoring, analysis, and correction of magnetic field  
1361 fluctuations in echo planar imaging time series. *Magn. Reson. Med.* 74, 396–409.  
1362 <https://doi.org/10.1002/mrm.25407>
- 1363 Kasper, L., Engel, M., Barmet, C., Haeberlin, M., Wilm, B.J., Dietrich, B.E., Schmid, T.,  
1364 Gross, S., Brunner, D.O., Stephan, K.E., Pruessmann, K.P., 2018. Rapid anatomical  
1365 brain imaging using spiral acquisition and an expanded signal model. *NeuroImage,*  
1366 *Neuroimaging with Ultra-high Field MRI: Present and Future* 168, 88–100.  
1367 <https://doi.org/10.1016/j.neuroimage.2017.07.062>
- 1368 Kasper, L., Engel, M., Heinzle, J., Mueller-Schrader, M., Graedel, N.N., Reber, J., Schmid,  
1369 T., Barmet, C., Wilm, B.J., Stephan, K.E., Pruessmann, K.P., 2021. Data Collection  
1370 for the Article “Advances in Spiral fMRI - A High-resolution Study with Single-shot  
1371 Acquisition”: Single Subject Dataset. <https://doi.org/10.3929/ethz-b-000487412>
- 1372 Kasper, L., Haeberlin, M., Dietrich, B.E., Gross, S., Barmet, C., Wilm, B.J., Vannesjo, S.J.,  
1373 Brunner, D.O., Ruff, C.C., Stephan, K.E., Pruessmann, K.P., 2014. Matched-filter  
1374 acquisition for BOLD fMRI. *NeuroImage* 100, 145–160.  
1375 <https://doi.org/10.1016/j.neuroimage.2014.05.024>

## Advances in Spiral fMRI

- 1376 Katyal, S., Zughni, S., Greene, C., Ress, D., 2010. Topography of Covert Visual Attention in  
1377 Human Superior Colliculus. *J. Neurophysiol.* 104, 3074–3083.  
1378 <https://doi.org/10.1152/jn.00283.2010>
- 1379 Keeling, S.L., Bammer, R., 2004. A variational approach to magnetic resonance coil  
1380 sensitivity estimation. *Appl. Math. Comput.* 158, 359–388.  
1381 <https://doi.org/10.1016/j.amc.2003.08.110>
- 1382 Kimmlingen, R., Eberlein, E., Dietz, P., Kreher, S., Schuster, J., Riegler, J., Matschl, V.,  
1383 Schnetter, V., Schmidt, A., Lenz, H., Mustafa, E., Fischer, D., Potthast, A.,  
1384 Kreischer, L., Eberler, M., Hebrank, F., Thein, H., Heberlein, K., Hoecht, P., Witzel,  
1385 T., Tisdall, D., Xu, J., Yacoub, E., Adriany, G., Auerbach, E., Moeller, S., Feinberg,  
1386 D., Lehne, D., Wald, L.L., Rosen, B., Ugurbil, K., Essen, D. van, Wedeen, V.,  
1387 Schmitt, F., 2012. Concept and realization of high strength gradients for the  
1388 Human Connectome Project, in: Proceedings of the 20th Annual Meeting of  
1389 ISMRM. Presented at the ISMRM, Melbourne, Australia, p. 696.
- 1390 Knopp, T., Grosser, M., 2021. MRIReco.jl: An MRI reconstruction framework written in  
1391 Julia. *Magn. Reson. Med.* 86, 1633–1646. <https://doi.org/10.1002/mrm.28792>
- 1392 Kok, P., Bains, L.J., van Mourik, T., Norris, D.G., de Lange, F.P., 2016. Selective Activation  
1393 of the Deep Layers of the Human Primary Visual Cortex by Top-Down Feedback.  
1394 *Curr. Biol.* 26, 371–376. <https://doi.org/10.1016/j.cub.2015.12.038>
- 1395 Koopmans, P.J., Barth, M., Norris, D.G., 2010. Layer-specific BOLD activation in human  
1396 V1. *Hum. Brain Mapp.* 31, 1297–1304. <https://doi.org/10.1002/hbm.20936>
- 1397 Kujovic, M., Zilles, K., Malikovic, A., Schleicher, A., Mohlberg, H., Rottschy, C., Eickhoff,  
1398 S.B., Amunts, K., 2013. Cytoarchitectonic mapping of the human dorsal extrastriate  
1399 cortex. *Brain Struct. Funct.* 218, 157–172. <https://doi.org/10.1007/s00429-012-0390-9>
- 1400 Kundu, P., Inati, S.J., Evans, J.W., Luh, W.-M., Bandettini, P.A., 2012. Differentiating  
1401 BOLD and non-BOLD signals in fMRI time series using multi-echo EPI.  
1402 *NeuroImage* 60, 1759–1770. <https://doi.org/10.1016/j.neuroimage.2011.12.028>

## Advances in Spiral fMRI

- 1403 Kurban, D., Liberman, G., Kashyap, S., Ivanov, D., Poser, B.A., 2019. Dual-echo  
1404 simultaneous multi-slice spiral acquisition for simultaneous CBF and BOLD fMRI  
1405 at 7T, in: Proceedings of the 27th Annual Meeting of ISMRM. Montreal, Canada, p.  
1406 367.
- 1407 Larkman, D.J., 2007. The g-Factor and Coil Design, in: Schoenberg, S.O., Dietrich, O.,  
1408 Reiser, M.F. (Eds.), Parallel Imaging in Clinical MR Applications, Medical  
1409 Radiology. Springer, Berlin, Heidelberg, pp. 37-48. [https://doi.org/10.1007/978-3-](https://doi.org/10.1007/978-3-540-68879-2_3)  
1410 [540-68879-2\\_3](https://doi.org/10.1007/978-3-540-68879-2_3)
- 1411 Larkman, D.J., Hajnal, J.V., Herlihy, A.H., Coutts, G.A., Young, I.R., Ehnholm, G., 2001.  
1412 Use of multicoil arrays for separation of signal from multiple slices simultaneously  
1413 excited. *J. Magn. Reson. Imaging* 13, 313-317. [https://doi.org/10.1002/1522-](https://doi.org/10.1002/1522-2586(200102)13:2<313::AID-JMRI1045>3.0.CO;2-W)  
1414 [2586\(200102\)13:2<313::AID-JMRI1045>3.0.CO;2-W](https://doi.org/10.1002/1522-2586(200102)13:2<313::AID-JMRI1045>3.0.CO;2-W)
- 1415 Law, C.S., Glover, G.H., 2009. Interleaved spiral-in/out with application to functional MRI  
1416 (fMRI). *Magn. Reson. Med.* 62, 829-834. <https://doi.org/10.1002/mrm.22056>
- 1417 Lawrence, S.J.D., van Mourik, T., Kok, P., Koopmans, P.J., Norris, D.G., de Lange, F.P.,  
1418 2018. Laminar Organization of Working Memory Signals in Human Visual Cortex.  
1419 *Curr. Biol.* 28, 3435-3440.e4. <https://doi.org/10.1016/j.cub.2018.08.043>
- 1420 Lee, Y., Wilm, B.J., Brunner, D.O., Gross, S., Schmid, T., Nagy, Z., Pruessmann, K.P., 2021.  
1421 On the signal-to-noise ratio benefit of spiral acquisition in diffusion MRI. *Magn.*  
1422 *Reson. Med.* 85, 1924-1937. <https://doi.org/10.1002/mrm.28554>
- 1423 Lewis, L.D., Setsompop, K., Rosen, B.R., Polimeni, J.R., 2016. Fast fMRI can detect  
1424 oscillatory neural activity in humans. *Proc. Natl. Acad. Sci.* 113, E6679-E6685.  
1425 <https://doi.org/10.1073/pnas.1608117113>
- 1426 Likes, R.S., 1981. Moving gradient zeugmatography. US 4307343.
- 1427 Lu, H., Golay, X., Pekar, J.J., Zijl, P.C.M. van, 2003. Functional magnetic resonance  
1428 imaging based on changes in vascular space occupancy. *Magn. Reson. Med.* 50,  
1429 263-274. <https://doi.org/10.1002/mrm.10519>

## Advances in Spiral fMRI

- 1430 Lu, H., Hua, J., van Zijl, P.C.M., 2013. Noninvasive functional imaging of cerebral blood  
1431 volume with vascular-space-occupancy (VASO) MRI. *NMR Biomed.* 26, 932–948.  
1432 <https://doi.org/10.1002/nbm.2905>
- 1433 Lustig, M., Kim, S.-J., Pauly, J.M., 2008. A Fast Method for Designing Time-Optimal  
1434 Gradient Waveforms for Arbitrary k-Space Trajectories. *IEEE Trans. Med. Imaging*  
1435 27, 866–873. <https://doi.org/10.1109/TMI.2008.922699>
- 1436 Lustig, M., Pauly, J.M., 2010. SPIRiT: Iterative self-consistent parallel imaging  
1437 reconstruction from arbitrary k-space. *Magn. Reson. Med.* 64, 457–471.  
1438 <https://doi.org/10.1002/mrm.22428>
- 1439 Maier, O., Baete, S.H., Fyrdahl, A., Hammernik, K., Harrevelt, S., Kasper, L., Karakuzu, A.,  
1440 Loecher, M., Patzig, F., Tian, Y., Wang, K., Gallichan, D., Uecker, M., Knoll, F.,  
1441 2021. CG-SENSE revisited: Results from the first ISMRM reproducibility challenge.  
1442 *Magn. Reson. Med.* 85, 1821–1839. <https://doi.org/10.1002/mrm.28569>
- 1443 Malikovic, A., Amunts, K., Schleicher, A., Mohlberg, H., Eickhoff, S.B., Wilms, M.,  
1444 Palomero-Gallagher, N., Armstrong, E., Zilles, K., 2007. Cytoarchitectonic Analysis  
1445 of the Human Extrastriate Cortex in the Region of V5/MT+: A Probabilistic,  
1446 Stereotaxic Map of Area hOc5. *Cereb. Cortex* 17, 562–574.  
1447 <https://doi.org/10.1093/cercor/bhj181>
- 1448 Malikovic, A., Amunts, K., Schleicher, A., Mohlberg, H., Kujovic, M., Palomero-Gallagher,  
1449 N., Eickhoff, S.B., Zilles, K., Zilles, K., 2016. Cytoarchitecture of the human lateral  
1450 occipital cortex: mapping of two extrastriate areas hOc4la and hOc4lp. *Brain*  
1451 *Struct. Funct.* 221, 1877–1897. <https://doi.org/10.1007/s00429-015-1009-8>
- 1452 Man, L.-C., Pauly, J.M., Macovski, A., 1997. Multifrequency interpolation for fast off-  
1453 resonance correction. *Magn. Reson. Med.* 37, 785–792.  
1454 <https://doi.org/10.1002/mrm.1910370523>
- 1455 Mansfield, P., 1977. Multi-planar image formation using NMR spin echoes. *J. Phys. C Solid*  
1456 *State Phys.* 10, L55. <https://doi.org/10.1088/0022-3719/10/3/004>

## Advances in Spiral fMRI

- 1457 Martino, F.D., Moerel, M., Ugurbil, K., Goebel, R., Yacoub, E., Formisano, E., 2015.  
1458 Frequency preference and attention effects across cortical depths in the human  
1459 primary auditory cortex. *Proc. Natl. Acad. Sci.* 112, 16036–16041.  
1460 <https://doi.org/10.1073/pnas.1507552112>
- 1461 Menon, R.S., 2002. Postacquisition suppression of large-vessel BOLD signals in high-  
1462 resolution fMRI. *Magn. Reson. Med.* 47, 1–9. <https://doi.org/10.1002/mrm.10041>
- 1463 Meyer, C.H., Hu, B.S., Nishimura, D.G., Macovski, A., 1992. Fast Spiral Coronary Artery  
1464 Imaging. *Magn. Reson. Med.* 28, 202–213. <https://doi.org/10.1002/mrm.1910280204>
- 1465 Muckli, L., De Martino, F., Vizioli, L., Petro, L.S., Smith, F.W., Ugurbil, K., Goebel, R.,  
1466 Yacoub, E., 2015. Contextual Feedback to Superficial Layers of V1. *Curr. Biol.* 25,  
1467 2690–2695. <https://doi.org/10.1016/j.cub.2015.08.057>
- 1468 Noll, D.C., Cohen, J.D., Meyer, C.H., Schneider, W., 1995. Spiral K-space MR imaging of  
1469 cortical activation. *J. Magn. Reson. Imaging* 5, 49–56.  
1470 <https://doi.org/10.1002/jmri.1880050112>
- 1471 Nussbaum, J., Rösler, M.B., Dietrich, B.E., Pruessmann, K.P., 2019. Nonlinearity and  
1472 thermal effects in gradient chains: a cascade analysis based on current and field  
1473 sensing, in: *Proceedings of the 27th Annual Meeting of ISMRM*. Montreal, Canada,  
1474 p. 213.
- 1475 Patzig, F., Kasper, L., Ulrich, T., Engel, M., Vannesjo, S.J., Weiger, M., Brunner, D.O.,  
1476 Wilm, B.J., Pruessmann, K.P., 2019. ISMRM 2019 RRSF Challenge: MRI Technology  
1477 and Methods Lab, ETH Zurich, GitHub Submission, in: *ISMRM 2019 Reproducible*  
1478 *Research Study Group Challenge*. <https://dx.doi.org/10.24433/CO.5840424.v1>
- 1479 Patzig, F., Wilm, B.J., Gross, S., Brunner, D.O., Pruessmann, K.P., 2020. Off-Resonance  
1480 Self-Correction for Single-Shot Imaging, in: *Proceedings of the 28th Annual*  
1481 *Meeting of ISMRM*. p. 3040.
- 1482 Peters, A.M., Brookes, M.J., Hoogenraad, F.G., Gowland, P.A., Francis, S.T., Morris, P.G.,  
1483 Bowtell, R., 2007. T2\* measurements in human brain at 1.5, 3 and 7 T. *Magn.*



## Advances in Spiral fMRI

- 1484 Reson. Imaging, Proceedings of the International School on Magnetic Resonance  
1485 and Brain Function 25, 748–753. <https://doi.org/10.1016/j.mri.2007.02.014>
- 1486 Pfeuffer, J., Van de Moortele, P.-F., Ugurbil, K., Hu, X., Glover, G.H., 2002. Correction of  
1487 physiologically induced global off-resonance effects in dynamic echo-planar and  
1488 spiral functional imaging. Magn. Reson. Med. 47, 344–353.  
1489 <https://doi.org/10.1002/mrm.10065>
- 1490 Poser, B.A., Koopmans, P.J., Witzel, T., Wald, L.L., Barth, M., 2010. Three dimensional  
1491 echo-planar imaging at 7 Tesla. NeuroImage 51, 261–266.  
1492 <https://doi.org/10.1016/j.neuroimage.2010.01.108>
- 1493 Power, J.D., Barnes, K.A., Snyder, A.Z., Schlaggar, B.L., Petersen, S.E., 2012. Spurious but  
1494 systematic correlations in functional connectivity MRI networks arise from subject  
1495 motion. NeuroImage 59, 2142–2154. <https://doi.org/10.1016/j.neuroimage.2011.10.018>
- 1496 Power, J.D., Lynch, C.J., Silver, B.M., Dubin, M.J., Martin, A., Jones, R.M., 2019.  
1497 Distinctions among real and apparent respiratory motions in human fMRI data.  
1498 NeuroImage 201, 116041. <https://doi.org/10.1016/j.neuroimage.2019.116041>
- 1499 Power, J.D., Plitt, M., Gotts, S.J., Kundu, P., Voon, V., Bandettini, P.A., Martin, A., 2018.  
1500 Ridding fMRI data of motion-related influences: Removal of signals with distinct  
1501 spatial and physical bases in multiecho data. Proc. Natl. Acad. Sci. 201720985.  
1502 <https://doi.org/10.1073/pnas.1720985115>
- 1503 Power, J.D., Schlaggar, B.L., Petersen, S.E., 2015. Recent progress and outstanding issues  
1504 in motion correction in resting state fMRI. NeuroImage 105, 536–551.  
1505 <https://doi.org/10.1016/j.neuroimage.2014.10.044>
- 1506 Preston, A.R., Bornstein, A.M., Hutchinson, J.B., Gaare, M.E., Glover, G.H., Wagner, A.D.,  
1507 2010. High-resolution fMRI of Content-sensitive Subsequent Memory Responses in  
1508 Human Medial Temporal Lobe. J. Cogn. Neurosci. 22, 156–173.  
1509 <https://doi.org/10.1162/jocn.2009.21195>
- 1510 Pruessmann, K.P., 2006. Encoding and reconstruction in parallel MRI. NMR Biomed. 19,  
1511 288. <http://dx.doi.org/10.1002/nbm.1042>

## Advances in Spiral fMRI

- 1512 Pruessmann, K.P., Weiger, M., Börnert, P., Boesiger, P., 2001. Advances in sensitivity  
1513 encoding with arbitrary k-space trajectories. *Magn. Reson. Med.* 46, 638–651.  
1514 <http://dx.doi.org/10.1002/mrm.1241>
- 1515 Pruessmann, K.P., Weiger, M., Scheidegger, M.B., Boesiger, P., 1999. SENSE: Sensitivity  
1516 encoding for fast MRI. *Magn. Reson. Med.* 42, 952–962.  
1517 [https://doi.org/10.1002/\(SICI\)1522-2594\(199911\)42:5<952::AID-MRM16>3.0.CO;2-S](https://doi.org/10.1002/(SICI)1522-2594(199911)42:5<952::AID-MRM16>3.0.CO;2-S)
- 1518 Qin, Q., 2012. Point spread functions of the T<sub>2</sub> decay in k-space trajectories with long  
1519 echo train. *Magn. Reson. Imaging* 30, 1134–1142.  
1520 <https://doi.org/10.1016/j.mri.2012.04.017>
- 1521 Rahmer, J., Mazurkewitz, P., Börnert, P., Nielsen, T., 2019. Rapid acquisition of the 3D  
1522 MRI gradient impulse response function using a simple phantom measurement.  
1523 *Magn. Reson. Med.* 82, 2146–2159. <https://doi.org/10.1002/mrm.27902>
- 1524 Rahmer, J., Schmale, I., Mazurkewitz, P., Lips, O., Börnert, P., 2021. Non-Cartesian k-  
1525 space trajectory calculation based on concurrent reading of the gradient amplifiers'  
1526 output currents. *Magn. Reson. Med.* 85, 3060–3070.  
1527 <https://doi.org/10.1002/mrm.28725>
- 1528 Ress, D., Glover, G.H., Liu, J., Wandell, B., 2007. Laminar profiles of functional activity in  
1529 the human brain. *NeuroImage* 34, 74–84.  
1530 <https://doi.org/10.1016/j.neuroimage.2006.08.020>
- 1531 Robison, R.K., Devaraj, A., Pipe, J.G., 2010. Fast, simple gradient delay estimation for  
1532 spiral MRI. *Magn. Reson. Med.* 63, 1683–1690. <https://doi.org/10.1002/mrm.22327>
- 1533 Robison, R.K., Li, Z., Wang, D., Ooi, M.B., Pipe, J.G., 2019. Correction of Bo eddy current  
1534 effects in spiral MRI. *Magn. Reson. Med.* 0. <https://doi.org/10.1002/mrm.27583>
- 1535 Rottschy, C., Eickhoff, S.B., Schleicher, A., Mohlberg, H., Kujovic, M., Zilles, K., Amunts,  
1536 K., 2007. Ventral visual cortex in humans: Cytoarchitectonic mapping of two  
1537 extrastriate areas. *Hum. Brain Mapp.* 28, 1045–1059.  
1538 <https://doi.org/10.1002/hbm.20348>

## Advances in Spiral fMRI

- 1539 Savjani, R.R., Katyal, S., Halfen, E., Kim, J.H., Ress, D., 2018. Polar-angle representation of  
1540 saccadic eye movements in human superior colliculus. *NeuroImage* 171, 199–208.  
1541 <https://doi.org/10.1016/j.neuroimage.2017.12.080>
- 1542 Schmitt, F., Stehling, M.K., Turner, R., 2012. *Echo-Planar Imaging: Theory, Technique and*  
1543 *Application*. Springer Science & Business Media.
- 1544 Setsompop, K., Gagoski, B.A., Polimeni, J.R., Witzel, T., Wedeen, V.J., Wald, L.L., 2012.  
1545 Blipped-controlled aliasing in parallel imaging for simultaneous multislice echo  
1546 planar imaging with reduced g-factor penalty. *Magn. Reson. Med.* 67, 1210–1224.  
1547 <https://doi.org/10.1002/mrm.23097>
- 1548 Shewchuk, J.R., 1994. *An Introduction to the Conjugate Gradient Method Without the*  
1549 *Agonizing Pain*.
- 1550 Siero, J.C., Petridou, N., Hoogduin, H., Luijten, P.R., Ramsey, N.F., 2011. Cortical Depth-  
1551 Dependent Temporal Dynamics of the BOLD Response in the Human Brain: J.  
1552 *Cereb. Blood Flow Metab.* <https://doi.org/10.1038/jcbfm.2011.57>
- 1553 Singh, V., Pfeuffer, J., Zhao, T., Ress, D., 2018. Evaluation of spiral acquisition variants for  
1554 functional imaging of human superior colliculus at 3T field strength. *Magn. Reson.*  
1555 *Med.* 79, 1931–1940. <https://doi.org/10.1002/mrm.26845>
- 1556 Sitek, K.R., Gulban, O.F., Calabrese, E., Johnson, G.A., Lage-Castellanos, A., Moerel, M.,  
1557 Ghosh, S.S., De Martino, F., 2019. Mapping the human subcortical auditory system  
1558 using histology, postmortem MRI and in vivo MRI at 7T. *eLife* 8, e48932.  
1559 <https://doi.org/10.7554/eLife.48932>
- 1560 Smith, S.M., Beckmann, C.F., Andersson, J., Auerbach, E.J., Bijsterbosch, J., Douaud, G.,  
1561 Duff, E., Feinberg, D.A., Griffanti, L., Harms, M.P., Kelly, M., Laumann, T., Miller,  
1562 K.L., Moeller, S., Petersen, S., Power, J., Salimi-Khorshidi, G., Snyder, A.Z., Vu,  
1563 A.T., Woolrich, M.W., Xu, J., Yacoub, E., Uğurbil, K., Van Essen, D.C., Glasser,  
1564 M.F., 2013. Resting-state fMRI in the Human Connectome Project. *NeuroImage*,  
1565 *Mapping the Connectome* 80, 144–168.  
1566 <https://doi.org/10.1016/j.neuroimage.2013.05.039>

## Advances in Spiral fMRI

- 1567 Sodickson, D.K., Manning, W.J., 1997. Simultaneous acquisition of spatial harmonics  
1568 (SMASH): Fast imaging with radiofrequency coil arrays. *Magn. Reson. Med.* 38,  
1569 591–603. <https://doi.org/10.1002/mrm.1910380414>
- 1570 Splitthoff, D. n., Zaitsev, M., 2009. SENSE shimming (SSH): A fast approach for  
1571 determining  $B_0$  field inhomogeneities using sensitivity coding. *Magn. Reson. Med.*  
1572 62, 1319–1325. <https://doi.org/10.1002/mrm.22083>
- 1573 Stich, M., Pfaff, C., Wech, T., Slawig, A., Ruyters, G., Dewdney, A., Ringler, R., Köstler, H.,  
1574 2020. The temperature dependence of gradient system response characteristics.  
1575 *Magn. Reson. Med.* 83, 1519–1527. <https://doi.org/10.1002/mrm.28013>
- 1576 Stikov, N., Trzasko, J.D., Bernstein, M.A., 2019. Reproducibility and the future of MRI  
1577 research. *Magn. Reson. Med.* 82, 1981–1983. <https://doi.org/10.1002/mrm.27939>
- 1578 Sutton, B.P., Noll, D.C., Fessler, J.A., 2003. Fast, iterative image reconstruction for MRI in  
1579 the presence of field inhomogeneities. *IEEE Trans. Med. Imaging* 22, 178–188.  
1580 <https://doi.org/10.1109/TMI.2002.808360>
- 1581 Uğurbil, K., Xu, J., Auerbach, E.J., Moeller, S., Vu, A.T., Duarte-Carvajalino, J.M., Lenglet,  
1582 C., Wu, X., Schmitter, S., Van de Moortele, P.F., Strupp, J., Sapiro, G., De Martino,  
1583 F., Wang, D., Harel, N., Garwood, M., Chen, L., Feinberg, D.A., Smith, S.M., Miller,  
1584 K.L., Sotiropoulos, S.N., Jbabdi, S., Andersson, J.L.R., Behrens, T.E.J., Glasser, M.F.,  
1585 Van Essen, D.C., Yacoub, E., 2013. Pushing spatial and temporal resolution for  
1586 functional and diffusion MRI in the Human Connectome Project. *NeuroImage* 80,  
1587 80–104. <https://doi.org/10.1016/j.neuroimage.2013.05.012>
- 1588 Uludağ, K., Blinder, P., 2018. Linking brain vascular physiology to hemodynamic response  
1589 in ultra-high field MRI. *NeuroImage* 168, 279–295.  
1590 <https://doi.org/10.1016/j.neuroimage.2017.02.063>
- 1591 Vannesjo, S.J., Dietrich, B.E., Pavan, M., Brunner, D.O., Wilm, B.J., Barmet, C.,  
1592 Pruessmann, K.P., 2014. Field camera measurements of gradient and shim impulse  
1593 responses using frequency sweeps. *Magn. Reson. Med.* 72, 570–583.  
1594 <https://doi.org/10.1002/mrm.24934>

## Advances in Spiral fMRI

- 1595 Vannesjo, S.J., Graedel, N.N., Kasper, L., Gross, S., Busch, J., Haeberlin, M., Barmet, C.,  
1596 Pruessmann, K.P., 2016. Image reconstruction using a gradient impulse response  
1597 model for trajectory prediction. *Magn. Reson. Med.* 76, 45–58.  
1598 <https://doi.org/10.1002/mrm.25841>
- 1599 Vannesjo, S.J., Haeberlin, M., Kasper, L., Pavan, M., Wilm, B.J., Barmet, C., Pruessmann,  
1600 K.P., 2013. Gradient system characterization by impulse response measurements  
1601 with a dynamic field camera. *Magn. Reson. Med.* 69, 583–93.  
1602 <https://doi.org/10.1002/mrm.24263>
- 1603 Wandell, B.A., Dumoulin, S.O., Brewer, A.A., 2007. Visual Field Maps in Human Cortex.  
1604 *Neuron* 56, 366–383. <https://doi.org/10.1016/j.neuron.2007.10.012>
- 1605 Wang, Y.C., Bianciardi, M., Chanes, L., Satpute, A.B., 2020. Ultra High Field fMRI of  
1606 Human Superior Colliculi Activity during Affective Visual Processing. *Sci. Rep.* 10,  
1607 1331. <https://doi.org/10.1038/s41598-020-57653-z>
- 1608 Warnking, J., Dojat, M., Guérin-Dugué, A., Delon-Martin, C., Olympieff, S., Richard, N.,  
1609 Chéhikian, A., Segebarth, C., 2002. fMRI Retinotopic Mapping—Step by Step.  
1610 *NeuroImage* 17, 1665–1683. <https://doi.org/10.1006/nimg.2002.1304>
- 1611 Weiger, M., Overweg, J., Rösler, M.B., Froidevaux, R., Hennel, F., Wilm, B.J., Penn, A.,  
1612 Sturzenegger, U., Schuth, W., Mathlener, M., Borgo, M., Börnert, P., Leussler, C.,  
1613 Luechinger, R., Dietrich, B.E., Reber, J., Brunner, D.O., Schmid, T., Vionnet, L.,  
1614 Pruessmann, K.P., 2018. A high-performance gradient insert for rapid and short-T2  
1615 imaging at full duty cycle. *Magn. Reson. Med.* 79, 3256–3266.  
1616 <https://doi.org/10.1002/mrm.26954>
- 1617 Weiger, M., Pruessmann, K.P., Österbauer, R., Börnert, P., Boesiger, P., Jezzard, P., 2002.  
1618 Sensitivity-encoded single-shot spiral imaging for reduced susceptibility artifacts  
1619 in BOLD fMRI. *Magn. Reson. Med.* 48, 860–866.  
1620 <https://doi.org/10.1002/mrm.10286>

## Advances in Spiral fMRI

- 1621 Welvaert, M., Rosseel, Y., 2013. On the Definition of Signal-To-Noise Ratio and Contrast-  
1622 To-Noise Ratio for fMRI Data. PLoS ONE 8, e77089.  
1623 <https://doi.org/10.1371/journal.pone.0077089>
- 1624 Wilkinson, M.D., Dumontier, M., Aalbersberg, I.J., Appleton, G., Axton, M., Baak, A.,  
1625 Blomberg, N., Boiten, J.-W., Santos, L.B. da S., Bourne, P.E., Bouwman, J., Brookes,  
1626 A.J., Clark, T., Crosas, M., Dillo, I., Dumon, O., Edmunds, S., Evelo, C.T., Finkers,  
1627 R., Gonzalez-Beltran, A., Gray, A.J.G., Groth, P., Goble, C., Grethe, J.S., Heringa, J.,  
1628 Hoen, P.A.C. 't, Hooft, R., Kuhn, T., Kok, R., Kok, J., Lusher, S.J., Martone, M.E.,  
1629 Mons, A., Packer, A.L., Persson, B., Rocca-Serra, P., Roos, M., Schaik, R. van,  
1630 Sansone, S.-A., Schultes, E., Sengstag, T., Slater, T., Strawn, G., Swertz, M.A.,  
1631 Thompson, M., Lei, J. van der, Mulligen, E. van, Velterop, J., Waagmeester, A.,  
1632 Wittenburg, P., Wolstencroft, K., Zhao, J., Mons, B., 2016. The FAIR Guiding  
1633 Principles for scientific data management and stewardship. Sci. Data 3, 1-9.  
1634 <https://doi.org/10.1038/sdata.2016.18>
- 1635 Wilm, B.J., Barmet, C., Gross, S., Kasper, L., Vannesjo, S.J., Haeberlin, M., Dietrich, B.E.,  
1636 Brunner, D.O., Schmid, T., Pruessmann, K.P., 2017. Single-shot spiral imaging  
1637 enabled by an expanded encoding model: Demonstration in diffusion MRI. Magn.  
1638 Reson. Med. 77, 83-91. <https://doi.org/10.1002/mrm.26493>
- 1639 Wilm, B.J., Barmet, C., Pavan, M., Pruessmann, K.P., 2011. Higher order reconstruction for  
1640 MRI in the presence of spatiotemporal field perturbations. Magn. Reson. Med. 65,  
1641 1690-1701. <https://doi.org/10.1002/mrm.22767>
- 1642 Wright, K.L., Hamilton, J.I., Griswold, M.A., Gulani, V., Seiberlich, N., 2014. Non-  
1643 Cartesian parallel imaging reconstruction. J. Magn. Reson. Imaging 40, 1022-1040.  
1644 <https://doi.org/10.1002/jmri.24521>
- 1645 Yacoub, E., Harel, N., Uğurbil, K., 2008. High-field fMRI unveils orientation columns in  
1646 humans. Proc. Natl. Acad. Sci. 105, 10607-10612.  
1647 <https://doi.org/10.1073/pnas.0804110105>

## Advances in Spiral fMRI

- 1648 Zahneisen, B., Ernst, T., Poser, B.A., 2015. SENSE and simultaneous multislice imaging.  
1649 Magn. Reson. Med. 74, 1356–1362. <https://doi.org/10.1002/mrm.25519>
- 1650 Zahneisen, B., Poser, B.A., Ernst, T., Stenger, A.V., 2014. Simultaneous Multi-Slice fMRI  
1651 using spiral trajectories. NeuroImage 92, 8–18.  
1652 <https://doi.org/10.1016/j.neuroimage.2014.01.056>
- 1653 Zanche, N.D., Barmet, C., Nordmeyer-Massner, J.A., Pruessmann, K.P., 2008. NMR probes  
1654 for measuring magnetic fields and field dynamics in MR systems. Magn. Reson.  
1655 Med. 60, 176–186. <https://doi.org/10.1002/mrm.21624>
- 1656
